# Supplementary material for: 2-Phenyl-4-bis(methylthio)methyleneoxazol-5-one: versatile template for diversity oriented synthesis of heterocycles
Source: Royal Society of Chemistry journal article supplement (doi:10.1039/c1ob05495c), 2011-01-01

## **2-Phenyl-4-bis(methylthio)methyleneoxazol-5-one: versatile template for diversity oriented synthesis of heterocycles: synthesis of novel 4-bis(methylthio)methylene-2-phenyl-1-aryl/alkylimidazol-5-(4*H*)-ones and other heterocycles**

Vijayalaxmi Amareshwar,<sup>a</sup> Nimesh C. Mishra,<sup>b</sup> Hiriyakkanavar Ila<sup>a\*</sup>

<sup>a</sup>*New Chemistry Unit, Jawaharlal Nehru Centre for Advanced Scientific Research, Jakkur, Bangalore-560064. India. E-mail: hila@jncasr.ac.in.*

<sup>b</sup>*Department of Chemistry, Indian Institute of Technology, Kanpur-206016. India.*

### **Supplementary information**

#### Contents

1. Characterization data for compounds, **4a-g, 4i, 4j-l, 5b, 5d-g, 5j-k.** (S2-S8)
2. <sup>1</sup>H and <sup>13</sup>C NMR spectra of all new compounds, **4a-l, 5a-b, 5d-l, 7-9, 14-17, 22-24.** (S9-S73)

***N*-(3-(Ethylamino)-1,1-bis(methylthio)-3-oxoprop-1-en-2-yl)benzamide (4a).**

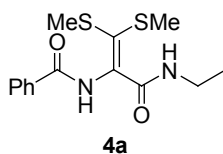

White solid, yield: 198 mg (85%), mp 154-155<sup>0</sup>C.  $R_f = 0.2$  (EtOAc/hexane:4/6).  $\nu_{\max}$  (KBr)/cm<sup>-1</sup> 1580, 1628, 3176, 3329. <sup>1</sup>H NMR  $\delta_H$  (400 MHz, CDCl<sub>3</sub>) 1.27 (3H, t,  $J = 7.2$  Hz, CH<sub>3</sub>), 2.35 (3H, s, SCH<sub>3</sub>), 2.36 (3H, s, SCH<sub>3</sub>), 3.49 (2H, q,  $J = 7.2$  Hz, CH<sub>2</sub>), 6.17 (1H, br s, NH), 7.56-7.44 (3H, m, ArH), 7.85 (2H, d,  $J = 8.4$  Hz, ArH), 8.38 (1H, br s, NH). <sup>13</sup>C NMR  $\delta_C$  (400 MHz, CDCl<sub>3</sub>) 14.3, 16.3, 17.8, 34.9, 124.7, 127.5, 128.7, 132.3, 133.1, 136.7, 164.0, 164.4. MS (MALDI/TOF):  $m/z$  calcd for C<sub>14</sub>H<sub>18</sub>N<sub>2</sub>O<sub>2</sub>S<sub>2</sub> 333.0709 [M + Na]<sup>+</sup>; found 332.990.

***N*-(3-(*i*-propylamino)-1,1-bis(methylthio)-3-oxoprop-1-en-2-yl)benzamide (4b).**

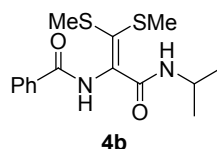

White solid, yield: 195 mg (80%), mp 168<sup>0</sup>C.  $R_f = 0.2$  (EtOAc/hexane: 3/7).  $\nu_{\max}$  (KBr)/cm<sup>-1</sup> 1290, 1544, 1626, 3204, 3312. <sup>1</sup>H NMR  $\delta_H$  (400 MHz, CDCl<sub>3</sub>) 1.29 (6H, d,  $J = 6.4$  Hz, (CH<sub>3</sub>)<sub>2</sub>), 2.33 (3H, s, SCH<sub>3</sub>), 2.34 (3H, s, SCH<sub>3</sub>), 4.26 (1H, sept,  $J = 8$  Hz, CH), 6.01 (1H, br s, NH), 7.44-7.56 (3H, m, ArH), 7.84-7.86 (2H, d,  $J = 7.2$  Hz, ArH), 8.39 (1H, br s, NH). <sup>13</sup>C NMR  $\delta_C$  (100 MHz, CDCl<sub>3</sub>) 16.4, 17.8, 22.4, 42.1, 123.9, 127.5, 128.7, 132.3, 133.2, 137.1, 163.0, 164.4. MS (MALDI/TOF):  $m/z$  calcd for C<sub>15</sub>H<sub>20</sub>N<sub>2</sub>O<sub>2</sub>S<sub>2</sub> [M + Na]<sup>+</sup> 347.0864; found 347.1238.

***N*-(3-(*t*-butylamino)-1,1-bis(methylthio)-3-oxoprop-1-en-2-yl)benzamide (4c).**

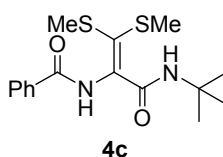

White solid, yield: 206 mg (81%), mp 190-191<sup>0</sup>C.  $R_f = 0.2$  (EtOAc/hexane: 3/7).  $\nu_{\max}$  (KBr)/cm<sup>-1</sup> 1289, 1535, 1631, 3178, 3345. <sup>1</sup>H NMR  $\delta_H$  (400 MHz, CDCl<sub>3</sub>) 1.47 (9H, s, (CH<sub>3</sub>)<sub>3</sub>), 2.33 (3H, s, SCH<sub>3</sub>), 2.34 (3H, s, SCH<sub>3</sub>), 6.02 (1H, br s, NH), 7.42-7.55 (3H, m, ArH), 7.85 (2H, d,  $J = 8.4$  Hz, ArH), 8.4 (1H, br s, NH). <sup>13</sup>C NMR  $\delta_C$  (100MHz, CDCl<sub>3</sub>) 16.4, 17.8, 52.0, 123.5, 127.5, 128.7, 132.2, 133.3, 138.0, 162.7, 164.4. MS (MALDI/TOF):  $m/z$  calcd for C<sub>16</sub>H<sub>22</sub>N<sub>2</sub>O<sub>2</sub>S<sub>2</sub> [M + Na]<sup>+</sup> 361.1021; found 361.1712.

***N*-3-(Cyclopropylamino)-1,1-bis(methylthio)-3-oxoprop-1-en-2-ylbenzamide (4d).**

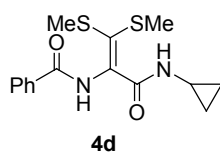

White solid, yield: 190 mg (78%), mp 168-169<sup>0</sup>C.  $R_f = 0.25$  (EtOAc/hexane: 3/7).  $\nu_{\max}$  (KBr)/cm<sup>-1</sup> 1287, 1529, 1572, 1635, 2919, 3181, 3310. <sup>1</sup>H NMR  $\delta_H$  (400 MHz, CDCl<sub>3</sub>) 0.70-0.74 (2H, m, -CH<sub>2</sub>-), 0.81-0.84 (2H, m, -CH<sub>2</sub>-), 2.32 (3H, s, SCH<sub>3</sub>), 2.33 (3H, s, SCH<sub>3</sub>), 2.87 (1H, sext,  $J = 7.2$  Hz, NCH), 6.28 (1H, br s, NH), 7.44-7.56 (3H, m, ArH), 7.84 (2H, d,  $J = 8.4$  Hz, ArH), 8.39 (1H, br s, NH). <sup>13</sup>C NMR  $\delta_C$  (400 MHz, CDCl<sub>3</sub>) 6.47, 16.3, 17.8, 23.0, 124.4, 127.5, 128.7, 132.3, 133.0, 136.7, 164.4, 165.4. MS (MALDI/TOF):  $m/z$  calcd for C<sub>15</sub>H<sub>18</sub>N<sub>2</sub>O<sub>2</sub>S<sub>2</sub> [M + Na]<sup>+</sup> 345.0907; found 345.1533.

***N*-3-(Cyclopentylamino)-1,1-bis(methylthio)-3-oxoprop-1-en-2-ylbenzamide (4e).**

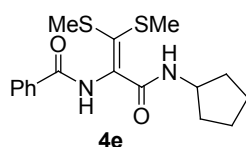

White solid, yield: 198 mg (75%), mp 176-178<sup>0</sup>C.  $R_f = 0.2$  (EtOAc/hexane: 4/6).  $\nu_{\max}$  (KBr)/cm<sup>-1</sup> 1296, 1471, 1549, 1636, 3058, 3263. <sup>1</sup>H NMR  $\delta_H$  (400 MHz, CDCl<sub>3</sub>) 1.63-1.73 (6H, m, -CH<sub>2</sub>-), 2.01-2.05 (2H, m, -CH<sub>2</sub>-), 2.32 (3H, s, SCH<sub>3</sub>), 2.33 (3H, s, SCH<sub>3</sub>), 4.34-4.39 (1H, m, NCH), 6.19-6.21 (1H, d,  $J = 6.4$  Hz, NH), 7.43-7.55 (3H, m, ArH), 7.84-7.86 (2H, d,  $J = 8.8$  Hz, ArH), 8.43 (1H, br s, NH). <sup>13</sup>C NMR  $\delta_C$  (100 MHz, CDCl<sub>3</sub>) 16.4, 17.9, 23.8, 32.6, 51.8, 124.3, 127.5, 128.7, 132.3, 133.1, 140.0, 163.4, 164.4. MS (MALDI/TOF):  $m/z$  calcd for C<sub>17</sub>H<sub>22</sub>N<sub>2</sub>O<sub>2</sub>S<sub>2</sub> [M + Na]<sup>+</sup> 373.1021; found 373.2133.

***N*-3-(Cyclohexylamino)-1,1-bis(methylthio)-3-oxoprop-1-en-2-ylbenzamide (4f).**

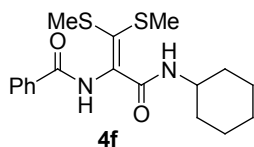

White solid, yield: 227 mg (78%), mp 196-197<sup>0</sup>C.  $R_f = 0.3$  (EtOAc/hexane: 4/6).  $\nu_{\max}$  (KBr)/cm<sup>-1</sup> 1082, 1301, 1479, 1544, 1631, 3350. <sup>1</sup>H NMR  $\delta_H$  (400 MHz, CDCl<sub>3</sub>) 1.17-1.33 (3H, m, -CH<sub>2</sub>-), 1.36-1.47 (2H, m, -CH<sub>2</sub>-), 1.60-1.65 (1H, m, -CH<sub>2</sub>-), 1.71-1.77 (4H, m, -CH<sub>2</sub>-), 2.33 (3H, s, SCH<sub>3</sub>), 2.35 (3H, s, SCH<sub>3</sub>), 3.35-3.39 (1H, m, NCH), 6.09 (1H, d,  $J = 8.0$  Hz, NH), 7.44-7.56 (3H, m, ArH), 7.86 (2H, dd,  $J_1 = 8.0$  Hz,  $J_2 = 8.4$  Hz, ArH), 8.39 (1H, br s, NH). <sup>13</sup>C NMR  $\delta_C$  (100 MHz, CDCl<sub>3</sub>)

16.3, 17.9, 24.8, 25.6, 32.7, 48.8, 124.0, 127.5, 128.7, 132.2, 133.2, 137.2, 163.0, 164.4. MS (MALDI/TOF):  $m/z$  calcd for  $C_{18}H_{24}N_2O_2S_2$   $[M + Na]^+$  387.1177; found 387.2050.

***N*-(3-(Benzylamino)-1,1-bis(methylthio)-3-oxoprop-1-en-2-yl)benzamide (4g).**

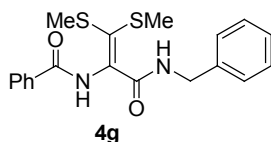

White solid, yield: 232 mg (78%), mp 177-178<sup>o</sup>C.  $R_f$  = 0.2 (MeOH/DCM: 0.2/9.8).  $\nu_{max}$  (KBr)/cm<sup>-1</sup> 1644, 1720, 3237, 3237. <sup>1</sup>H NMR  $\delta_H$  (400 MHz, CDCl<sub>3</sub>) 2.29 (3H, s, SCH<sub>3</sub>), 2.35 (3H, s, SCH<sub>3</sub>), 4.66 (2H, d,  $J$  = 5.6 Hz, CH<sub>2</sub>), 6.41-6.42 (1H, t,  $J$  = 4.8 Hz, NH), 7.28-7.37 (3H, m, ArH), 7.45-7.58 (5H, m, ArH), 7.87 (2H, d,  $J$  = 7.2 Hz, ArH), 8.41 (1H, br s, NH). <sup>13</sup>C NMR  $\delta_C$  (400 MHz, CDCl<sub>3</sub>) 16.4, 17.8, 44.4, 125.0, 127.5, 127.7, 128.2, 128.6, 128.8, 132.3, 133.0, 136.4, 137.8, 164.0, 164.4. MS (MALDI/TOF):  $m/z$  calcd for  $C_{19}H_{20}N_2O_2S_2$   $[M + Na]^+$  395.0864; found 395.1975.

***N*-(3-(2-(1*H*-indol-3-yl)ethylamino)-1,1-bis(methylthio)-3-oxoprop-1-en-2-yl)benzamide (4i).**

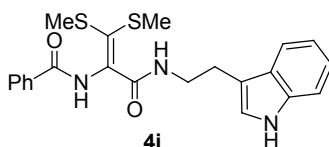

White solid, yield: 287 mg (85%), mp 136-137<sup>o</sup>C.  $\nu_{max}$  (KBr)/cm<sup>-1</sup> 1459, 1574, 1642, 1664, 3208, 3327, 3371.  $R_f$  = 0.3 (MeOH/DCM: 0.2/9.8). <sup>1</sup>H NMR  $\delta_H$  (400 MHz, DMSO-d<sub>6</sub>) 2.28 (3H, s, SCH<sub>3</sub>), 2.30 (3H, s, SCH<sub>3</sub>), 2.91 (2H, t,  $J$  = 8 Hz, CH<sub>2</sub>), 3.41 (2H, t,  $J$  = 8 Hz, NCH<sub>2</sub>), 6.97 (1H, dd,  $J_1$  = 7.2 Hz,  $J_2$  = 0.8 Hz, ArH), 7.06 (1H, dd,  $J_1$  = 7.2 Hz,  $J_2$  = 1.2 Hz, ArH), 7.20 (1H, d,  $J$  = 2 Hz, ArH), 7.33 (1H, d,  $J$  = 8 Hz, ArH), 7.49-7.61 (4H, m, ArH), 7.94 (2H, d,  $J$  = 8 Hz, ArH), 8.18 (1H, t,  $J$  = 5.6 Hz, NH), 9.65 (1H, br s, NH), 10.80 (1H br s, NH). <sup>13</sup>C NMR  $\delta_C$  (400 MHz, DMSO-d<sub>6</sub>) 16.3, 17.0, 24.8, 111.3, 111.8, 118.2, 118.2, 120.8, 122.7, 127.2, 127.7, 128.4, 130.5, 131.8, 133.4, 134.9, 136.3, 163.9, 164.4. MS (MALDI/TOF):  $m/z$  calcd for  $C_{22}H_{23}N_3O_2S_2$   $[M + Na]^+$  448.1130; found 448.1527.

***N*-(3-(4-Methylphenylamino)-1,1-bis(methylthio)-3-oxoprop-1-en-2-yl)benzamide (4j).**

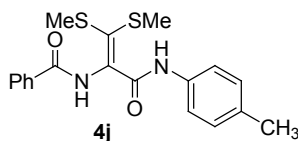

White solid, yield: 208 mg (70%), mp 206-208<sup>0</sup>C.  $R_f = 0.3$  (EtOAc/hexane: 3/7).  $\nu_{\max}$  (KBr)/cm<sup>-1</sup> 1477, 1510, 1604, 1664, 3287. <sup>1</sup>H NMR  $\delta_H$  (400 MHz, CDCl<sub>3</sub>). 2.29 (3H, s, SCH<sub>3</sub>), 2.32 (3H, s, SCH<sub>3</sub>), 2.33 (3H, s, SCH<sub>3</sub>), 7.09 (2H, d,  $J = 8.0$ , ArH), 7.43-7.54 (5H, m, ArH), 7.87 (2H, d,  $J = 7.8$  Hz, ArH), 8.36 (1H, br s, NH), 8.51 (1H, br s, NH). <sup>13</sup>C NMR  $\delta_C$  (100 MHz, CDCl<sub>3</sub>) 16.4, 17.8, 20.9, 120.2, 127.6, 128.7, 129.4, 132.3, 132.6, 132.9, 134.1, 135.1, 135.4, 162.2, 165.0. MS (MALDI/TOF):  $m/z$  calcd for C<sub>19</sub>H<sub>20</sub>N<sub>2</sub>O<sub>2</sub>S<sub>2</sub> [M + Na]<sup>+</sup> 395.0864; found 395.2066.

***N*-(3-(4-methoxyphenylamino)-1,1-bis(methylthio)-3-oxoprop-1-en-2-yl)benzamide (4k).**

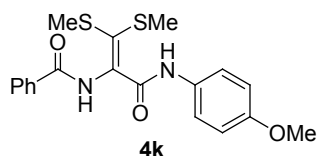

White solid, yield: 95 mg (65%), mp 174-1175<sup>0</sup>C.  $R_f = 0.3$  (MeOH/DCM: 2/8).  $\nu_{\max}$  (KBr)/cm<sup>-1</sup> 1239, 1511, 1646, 3246. <sup>1</sup>H NMR  $\delta_H$  (400 MHz, CDCl<sub>3</sub>) 2.37 (3H, s, SCH<sub>3</sub>), 2.38 (3H, s, SCH<sub>3</sub>), 3.79 (3H, s, OCH<sub>3</sub>), 6.89 (1H, d,  $J = 8.4$  Hz, ArH), 7.45-7.57 (5H, m, ArH), 7.87 (2H, d,  $J = 8.4$  Hz, ArH), 8.01 (1H, br s, NH), 8.37 (1H, br s, NH). <sup>13</sup>C NMR  $\delta_C$  (100 MHz, CDCl<sub>3</sub>) 16.4, 17.9, 55.5, 114.2, 122.0, 127.0, 127.6, 128.7, 130.9, 132.4, 132.8, 136.0, 156.7, 162.0, 164.9. MS (FAB):  $m/z$  calcd for C<sub>20</sub>H<sub>22</sub>N<sub>2</sub>O<sub>4</sub>S<sub>2</sub> [M + Na]<sup>+</sup> 441.0919; found 441.2707.

***N*-(3-(3,4-Dimethoxyphenylamino)-1,1-bis(methylthio)-3-oxoprop-1-en-2-yl)benzamide (4l).**

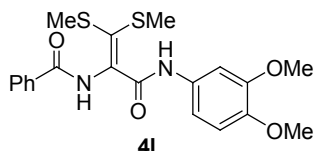

White solid, yield: 217 mg (69%), mp 210-211<sup>0</sup>C.  $R_f = 0.2$  (EtOAc/hexane: 4/6).  $\nu_{\max}$  (KBr)/cm<sup>-1</sup> 1236, 1513, 1580, 1609, 1651, 3080, 3251. <sup>1</sup>H NMR  $\delta_H$  (400 MHz, CDCl<sub>3</sub>) 2.25 (3H, s, SCH<sub>3</sub>), 2.29 (3H, s, SCH<sub>3</sub>), 3.79 (3H, s, OCH<sub>3</sub>), 3.81 (3H, s, OCH<sub>3</sub>), 6.70 (1H, d,  $J = 8.8$  Hz, ArH), 7.02 (1H, dd,  $J_1 = 8.8$  Hz,  $J_2 = 2.2$  Hz, ArH), 7.37-7.51 (4H, m, ArH), 7.85 (2H, d,  $J = 7.32$ , ArH), 8.54 (2H, br s, NH), 8.55 (1H, br s, NH). MS (MALDI/TOF):  $m/z$  calcd for C<sub>20</sub>H<sub>22</sub>N<sub>2</sub>O<sub>4</sub>S<sub>2</sub> [M + Na]<sup>+</sup> 441.0919; found 441.1702.

#### 4-(Bis(methylthio)methylene)-1-isopropyl-2-phenyl-1H-imidazol-5-(4H)-one (5b).

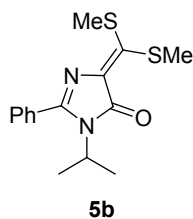

Yellow solid, yield: 91 mg (48%), mp 110<sup>0</sup>C.  $R_f = 0.7$  (EtOAc/hexane: 3/7).  $\nu_{\max}$  (KBr)/cm<sup>-1</sup> 1278, 1368, 1495, 1561, 1669. <sup>1</sup>H NMR  $\delta_H$  (400 MHz, CDCl<sub>3</sub>) 1.47 (6H, d,  $J = 6.8$ , (CH<sub>3</sub>)<sub>2</sub>), 2.60 (3H, s, SCH<sub>3</sub>), 2.75 (3H, s, SCH<sub>3</sub>), 4.16 (1H, sept,  $J = 6.8$  Hz, NCH), 7.44-7.48 (3H, m, ArH), 7.53-7.55 (2H, m, ArH). <sup>13</sup>C NMR  $\delta_C$  (100 MHz, CDCl<sub>3</sub>) 18.0, 20.0, 20.0, 47.6, 128.4, 128.6, 130.1, 130.3, 135.7, 154.6, 156.1, 165.3. MS (MALDI/TOF):  $m/z$  calcd for C<sub>15</sub>H<sub>18</sub>N<sub>2</sub>OS<sub>2</sub> [M + H]<sup>+</sup> 307.0939; found 307.1093.

#### 4-(Bis(methylthio)methylene)-1-cyclopropyl-2-phenyl-1H-imidazol-5-(4H)-one (5d).

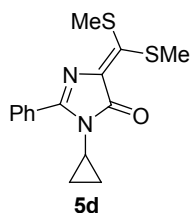

White solid, yield: 126 mg (67%), mp 99-100<sup>0</sup>C.  $R_f = 0.2$  (EtOAc/hexane: 4/6).  $\nu_{\max}$  (KBr)/cm<sup>-1</sup> 1294, 1396, 1487, 1550, 1667. <sup>1</sup>H NMR  $\delta_H$  (400 MHz, CDCl<sub>3</sub>) 0.57 (2H, m, CH<sub>2</sub>), 0.89 (2H, m, CH<sub>2</sub>), 2.57 (3H, s, SCH<sub>3</sub>), 2.76 (3H, s, SCH<sub>3</sub>), 2.87 (1H, br m, NCH), 7.37-7.42 (3H, m, ArH), 7.82 (2H, d,  $J = 6.8$ , 2H, ArH). <sup>13</sup>C NMR  $\delta_C$  (100 MHz, CDCl<sub>3</sub>) 8.5, 18.5, 19.9, 24.4, 128.3, 128.6, 129.0, 130.7, 133.3, 155.3, 156.7, 165.0 MALDI/TOF):  $m/z$  calcd for C<sub>15</sub>H<sub>16</sub>N<sub>2</sub>OS<sub>2</sub> [M + H]<sup>+</sup> 305.078; found 2305.2065.

#### 4-(Bis(methylthio)methylene)-1-cyclopentyl-2-phenyl-1H-imidazol-5-(4H)-one (5e).

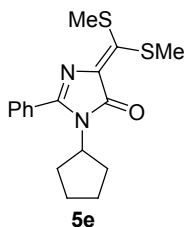

Yellow low melting solid, yield: 123 mg (65%),  $R_f = 0.6$  (EtOAc/hexane: 3/7).  $\nu_{\max}$  (KBr)/cm<sup>-1</sup> 1370, 1496, 1562, 1676. <sup>1</sup>H NMR  $\delta_H$  (400 MHz, CDCl<sub>3</sub>) 1.43-1.49 (2H, m, -CH<sub>2</sub>-), 1.71-1.79 (2H, m, -CH<sub>2</sub>-), 1.86-1.96 (2H, m, CH<sub>2</sub>), 2.20-2.29 (2H, quint,  $J = 8.8$  Hz, CH<sub>2</sub>), 2.57 (3H, s, SCH<sub>3</sub>), 2.73

(3H, s, SCH<sub>3</sub>), 4.18-4.22 (1H, m, CH), 7.39-7.44 (3H, m, ArH), 7.52-7.54 (2H, m, ArH). <sup>13</sup>C NMR δ<sub>C</sub> (100 MHz, CDCl<sub>3</sub>) 18.0, 19.7, 25.4, 29.4, 56.1, 126.1, 128.6, 128.6, 128.8, 129.8, 130.5, 156.6, 164.6. MS (FAB, *m/z*, %): 333(50, [M + H]<sup>+</sup>). Elemental analysis for C<sub>17</sub>H<sub>20</sub>N<sub>2</sub>OS<sub>2</sub>: calcd: C, 61.41; H, 6.06; N, 8.43. Found: C, 61.48; H, 6.11; N, 8.36.

**4-(Bis(methylthio)methylene)-1-cyclohexyl-2-phenyl-1H-imidazol-5-(4H)-one (5f).**

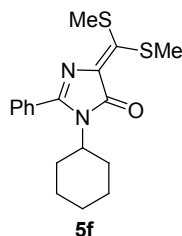

Pale yellow solid, yield: 122 mg (64%), mp 97-98<sup>0</sup>C. R<sub>f</sub> = 0.6 (EtOAc/hexane: 4/6). v<sub>max</sub> (KBr)/cm<sup>-1</sup> 1371, 1444, 1494, 1564, 1583, 1665. <sup>1</sup>H NMR δ<sub>H</sub> (400 MHz, CDCl<sub>3</sub>) 1.18-1.08 (4H, m, -CH<sub>2</sub>-), 1.37-1.78 (4H, m, -CH<sub>2</sub>-), 2.34-2.43 (2H, m, -CH<sub>2</sub>-), 2.6 (3H, s, SCH<sub>3</sub>), 2.7 (3H, s, SCH<sub>3</sub>), 3.68-3.71 (1H, m, NCH), 7.40-7.45 (3H, m, ArH), 7.49-7.51 (2H, m, ArH). <sup>13</sup>C NMR δ<sub>C</sub> (100 MHz, CDCl<sub>3</sub>) 18.0, 19.5, 24.9, 25.9, 29.4, 55.6, 128.4, 128.5, 130.1, 130.2, 135.7, 154.5, 156.3, 165.1. MS (FAB, *m/z*, %): 347 (100, [M + H]<sup>+</sup>, 346 (60, [M]<sup>+</sup>). Elemental analysis for C<sub>18</sub>H<sub>22</sub>N<sub>2</sub>OS<sub>2</sub>: calcd: C, 62.39; H, 6.40; N, 8.08. Found: C, 62.46, H, 6.48, N, 8.02.

**4-(Bis(methylthio)methylen)-1-benzyl-4-(bis(methylthio)methylen)-2-phenyl-1H-imidazol-5(4H)-one (5g).**

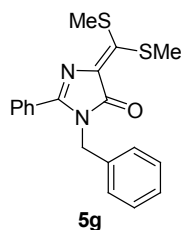

White solid, yield: 111 mg (59%), mp 129-130<sup>0</sup>C. R<sub>f</sub> = 0.5 (EtOAc/hexane: 2/8). v<sub>max</sub> (KBr)/cm<sup>-1</sup> 1307, 1391, 1438, 1494, 1557, 1681. <sup>1</sup>H NMR δ<sub>H</sub> (400 MHz, CDCl<sub>3</sub>) 2.65 (3H, s, SCH<sub>3</sub>), 2.82 (3H, s, SCH<sub>3</sub>), 4.91 (2H, s, CH<sub>2</sub>), 7.10 (2H, d, *J* = 7.0 Hz, ArH), 7.21-7.28 (3H, m, ArH), 7.36-7.37 (2H, m, ArH), 7.41-7.42 (1H, m, ArH), 7.53-7.54 (2H, m, ArH). <sup>13</sup>C NMR δ<sub>C</sub> (100 MHz, CDCl<sub>3</sub>) 18.2, 19.7, 45.2, 126.8, 127.4, 128.3, 128.5, 128.6, 129.6, 130.5, 134.5, 136.8, 155.1, 156.5, 165.0. MS (MALDI/TOF): *m/z* calcd for C<sub>19</sub>H<sub>18</sub>N<sub>2</sub>OS<sub>2</sub> [M + H]<sup>+</sup> 355.0939; found 355.1284.

**4-(Bis(methylthio)methylene)-2-phenyl-1-(4-methylphenyl)-1*H*-imidazol-5(4*H*)-one (5j).**

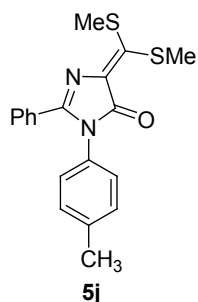

Yellow solid, yield: 110 mg (58%), mp 165-166<sup>0</sup>C.  $R_f = 0.5$  (EtOAc/hexane: 2/8).  $\nu_{\max}$  (KBr)/cm<sup>-1</sup> 1384, 1493, 1557, 1680, 2853, 2922, 3349. <sup>1</sup>H NMR  $\delta_H$  (400 MHz, CDCl<sub>3</sub>) 2.37 (3H, s, SCH<sub>3</sub>), 2.66 (3H, s, SCH<sub>3</sub>), 2.90 (3H, s, CH<sub>3</sub>), 7.04 (2H, d,  $J = 8.0$  Hz, ArH), 7.19 (2H, d,  $J = 8.0$  Hz, ArH), 7.24-7.37 (3H, m, ArH), 7.46 (2H, dd,  $J_1 = 7.8$  Hz,  $J_2 = 1.5$  Hz, ArH). <sup>13</sup>C NMR  $\delta_C$  (100 MHz, CDCl<sub>3</sub>) 18.4, 20.0, 21.2, 127.1, 128.2, 128.7, 129.2, 129.9, 130.3, 132.2, 134.2, 138.1, 153.1, 156.7, 164.2. MS (ESI):  $m/z$  355.2 ([M + H]<sup>+</sup>, 100%). Elemental analysis for C<sub>19</sub>H<sub>18</sub>N<sub>2</sub>OS<sub>2</sub>: calcd: C, 64.38; H, 5.12; N, 7.90. Found: C, 64.46; H, 5.16; N, 7.86.

**4-(Bis(methylthio)methylene)-1-(4-methoxyphenyl)-2-phenyl-1*H*-imidazol-5(4*H*)-one (5k).**

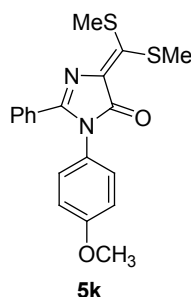

Yellow solid, yield: 122 mg (64%), mp 166-168<sup>0</sup>C.  $R_f = 0.3$  (EtOAc/hexane: 4/6).  $\nu_{\max}$  (KBr)/cm<sup>-1</sup> 1244, 1297, 1492, 1512, 1558, 1672. <sup>1</sup>H NMR  $\delta_H$  (400 MHz, CDCl<sub>3</sub>) 2.63 (3H, s, CH<sub>3</sub>), 2.87 (3H, s, SCH<sub>3</sub>), 3.79 (3H, s, OCH<sub>3</sub>), 6.88 (2H, d,  $J = 8.5$  Hz, ArH), 7.05 (2H, d,  $J = 8.5$  Hz, ArH), 7.22-7.35 (3H, m, ArH), 7.45 (2H, d,  $J = 7.5$  Hz, ArH). <sup>13</sup>C NMR  $\delta_C$  (100 MHz, CDCl<sub>3</sub>) 18.6, 20.2, 55.4, 114.6, 127.3, 128.2, 128.4, 128.6, 128.9, 130.7, 132.8, 153.2, 157.9, 159.3, 163.7. MS (ESI,  $m/z$ , %): 371 (100, [M + H]<sup>+</sup>). Elemental analysis for C<sub>19</sub>H<sub>18</sub>N<sub>2</sub>O<sub>2</sub>S<sub>2</sub>: calcd: C, 61.60; H, 4.90; N, 7.56. Found: C, 61.67; H, 4.94; N, 7.49.



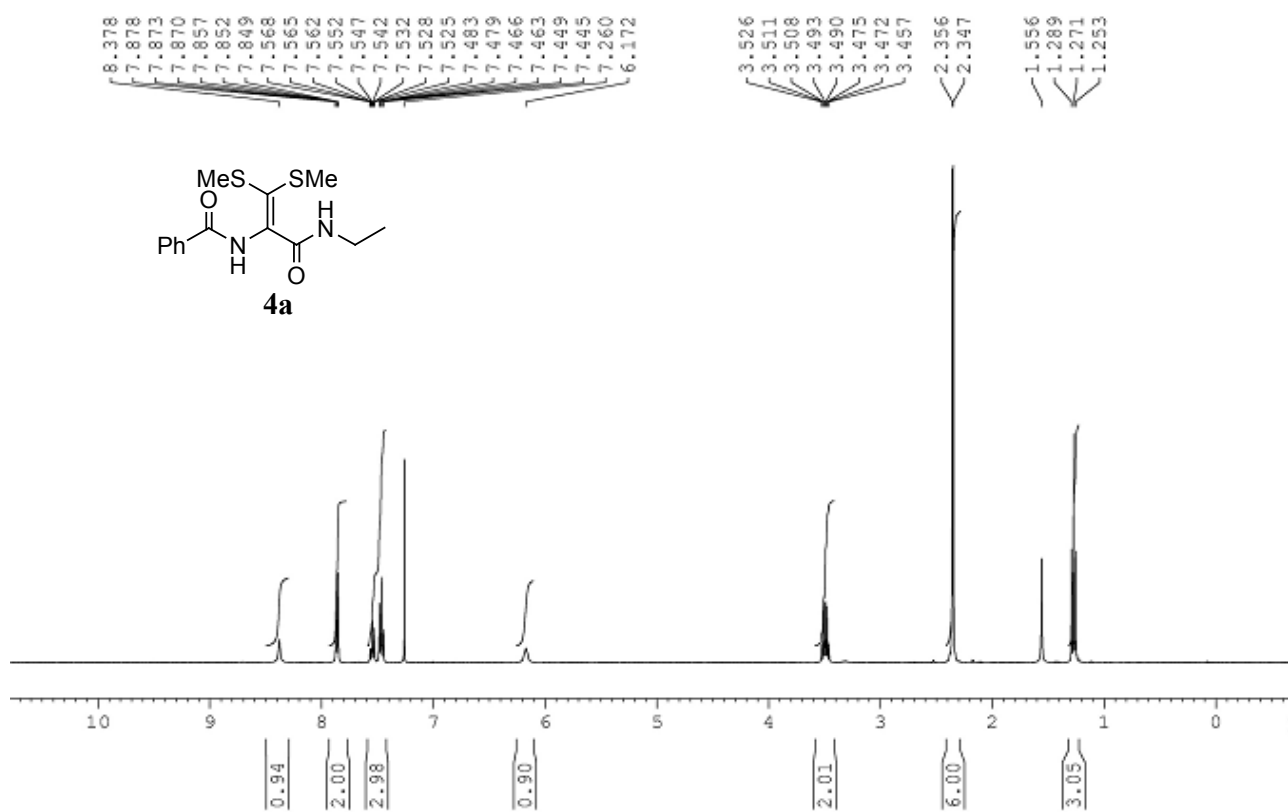

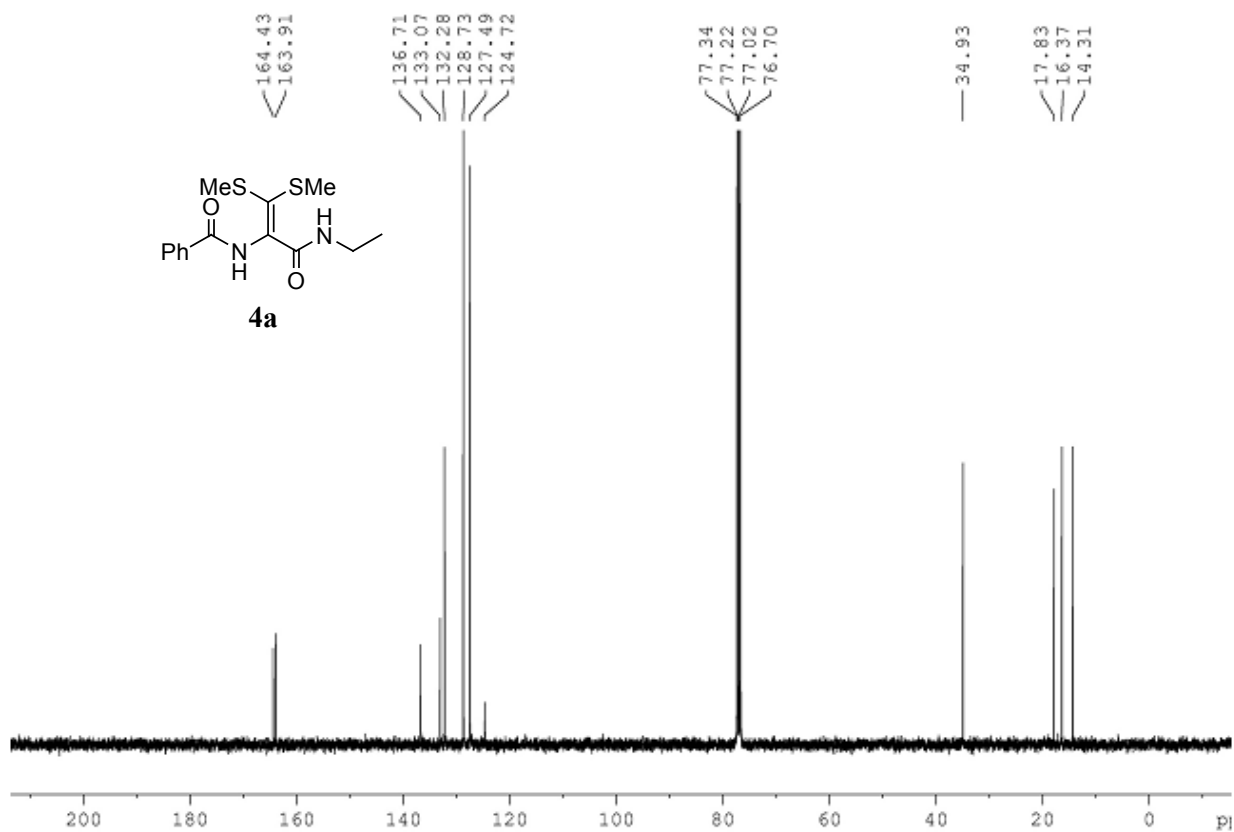

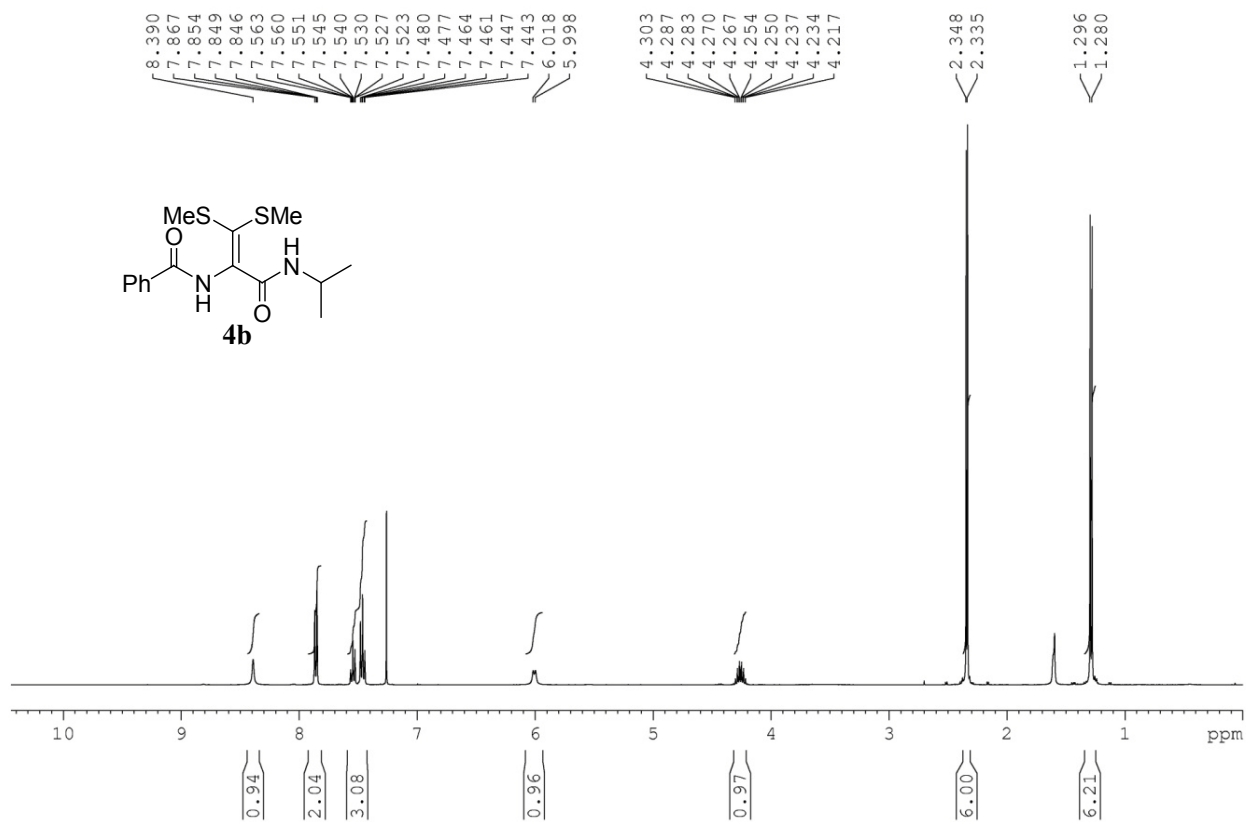

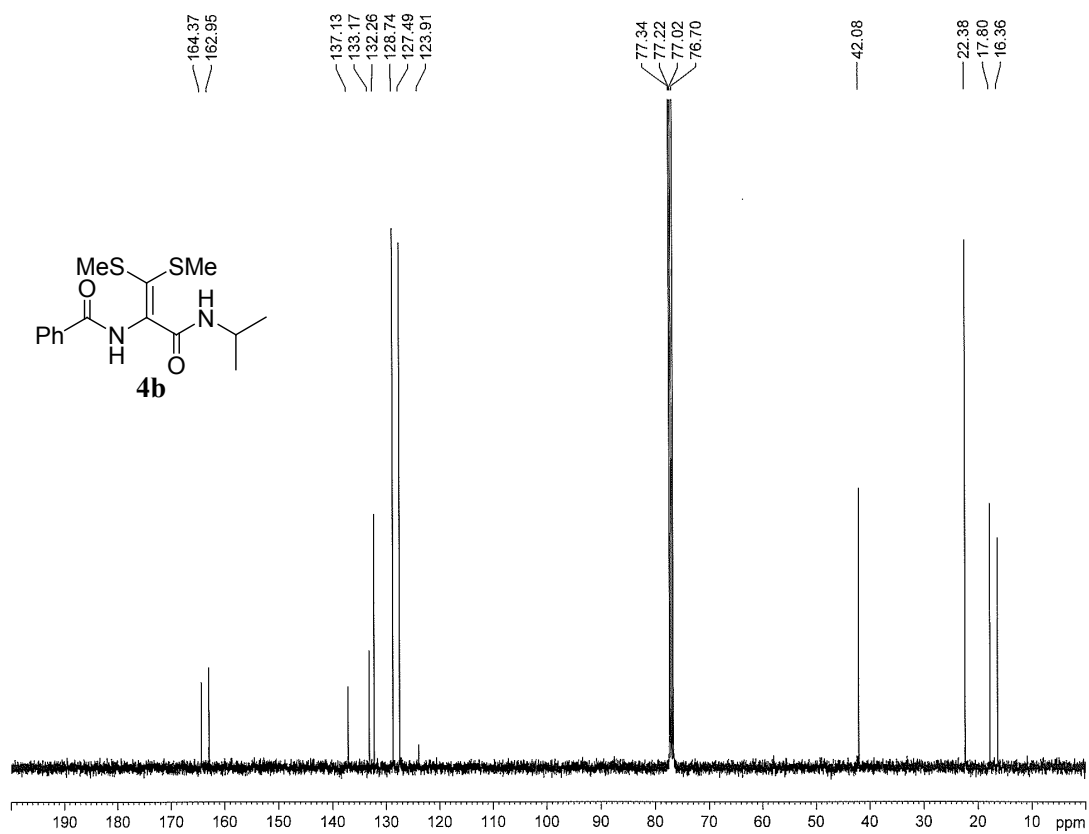



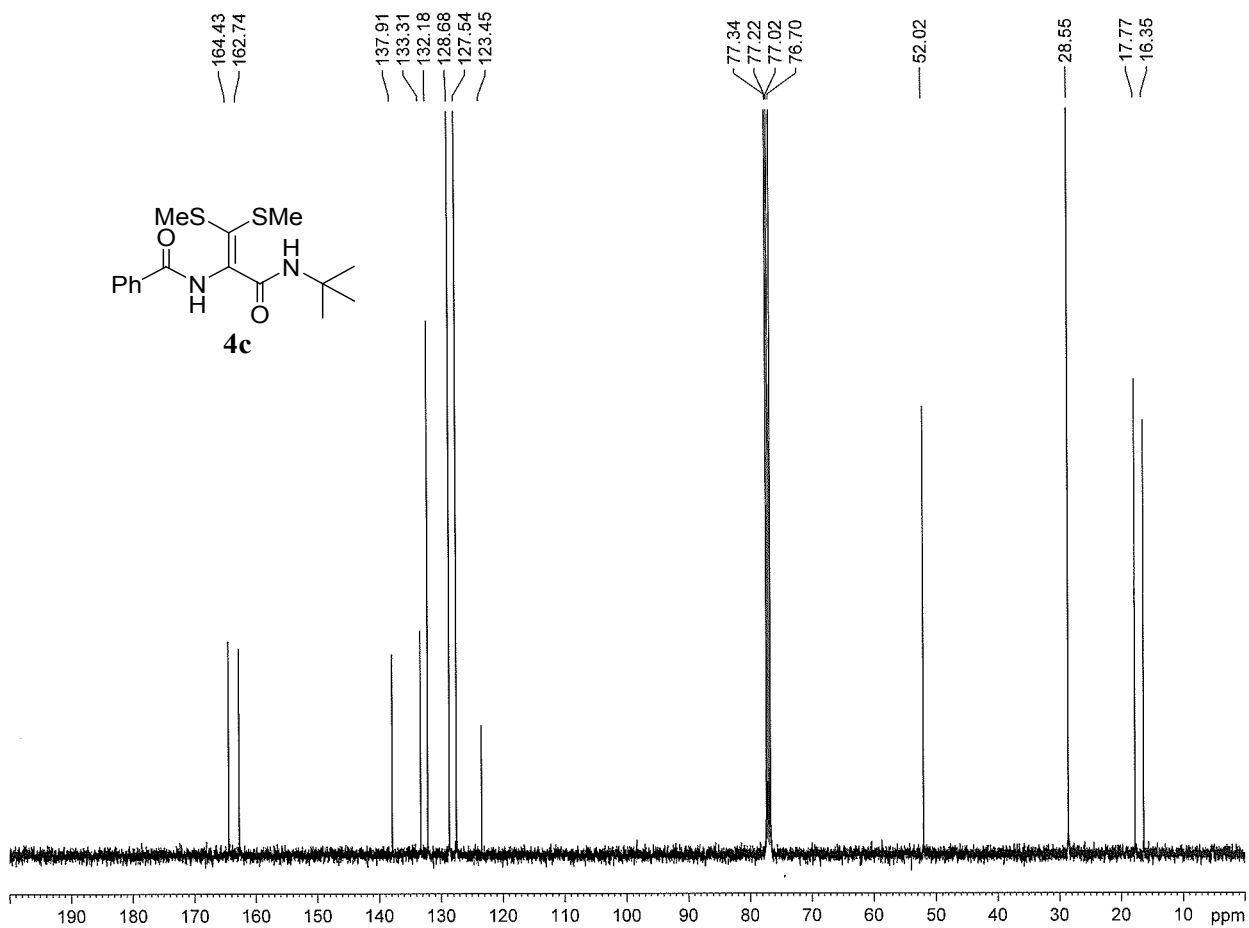

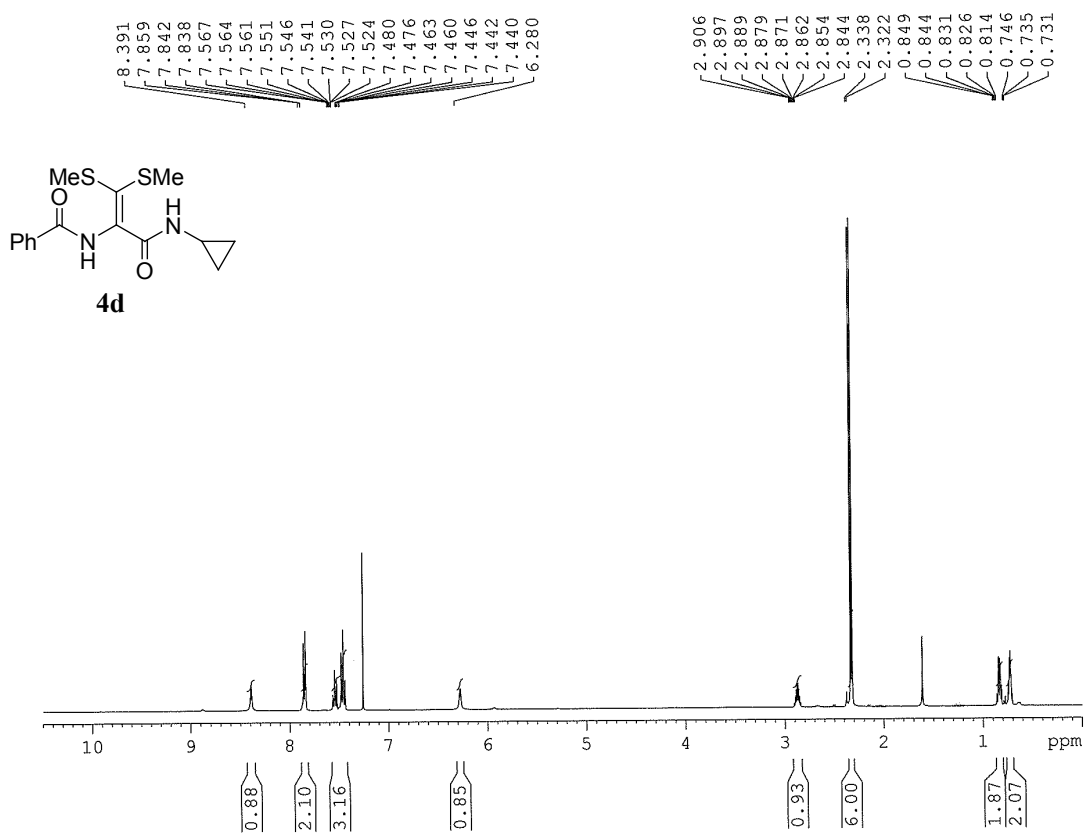

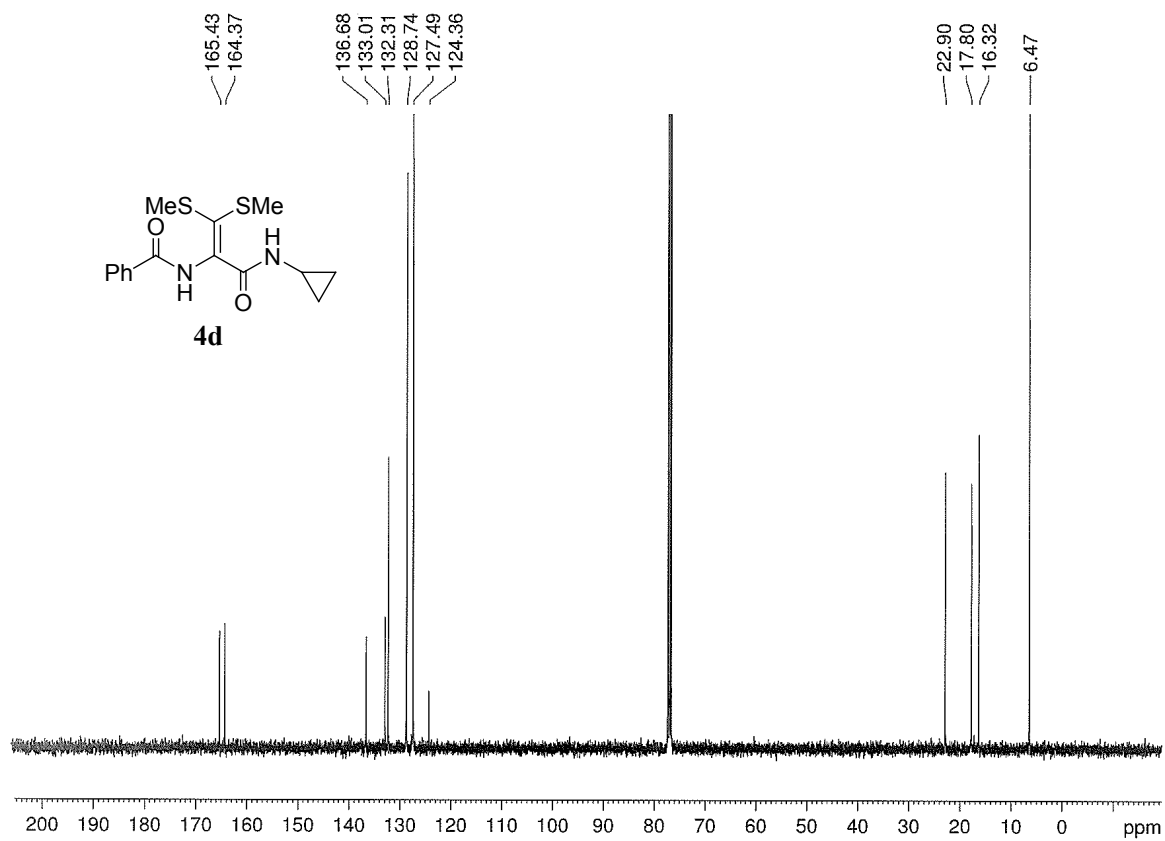



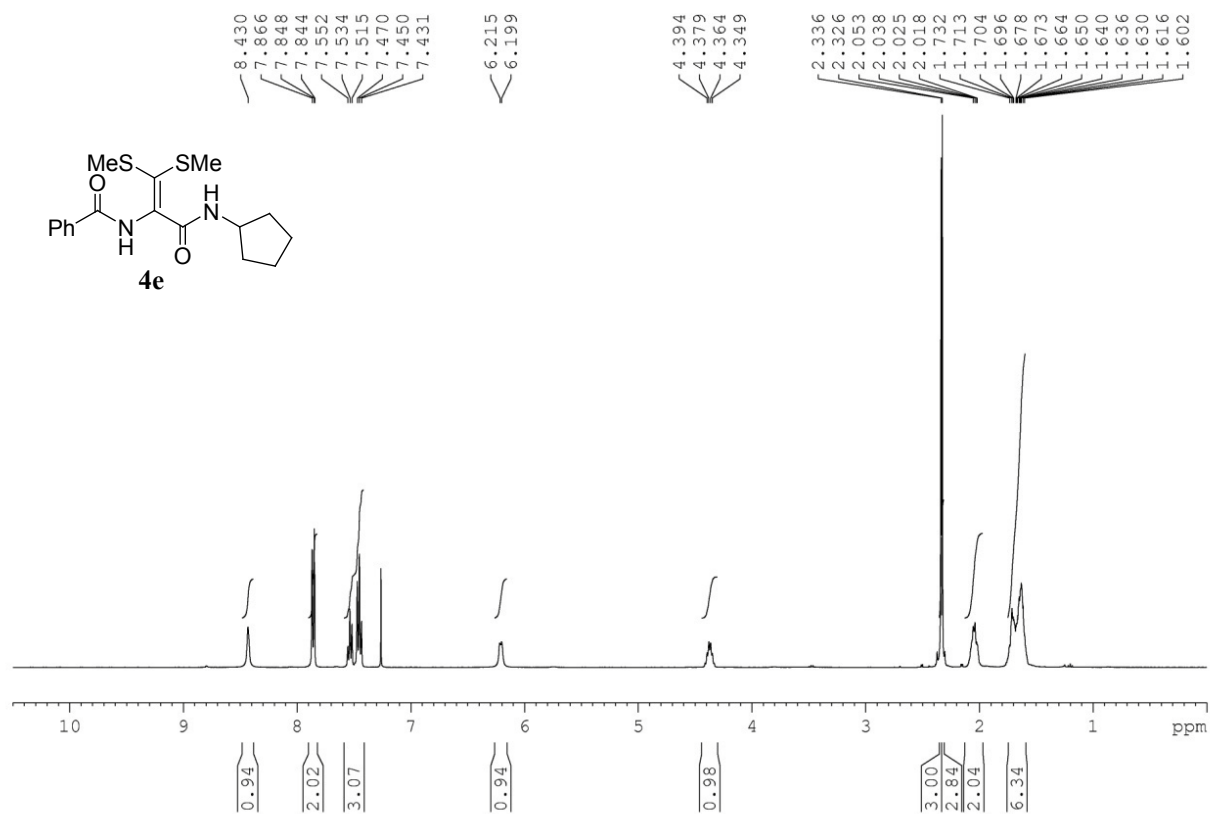

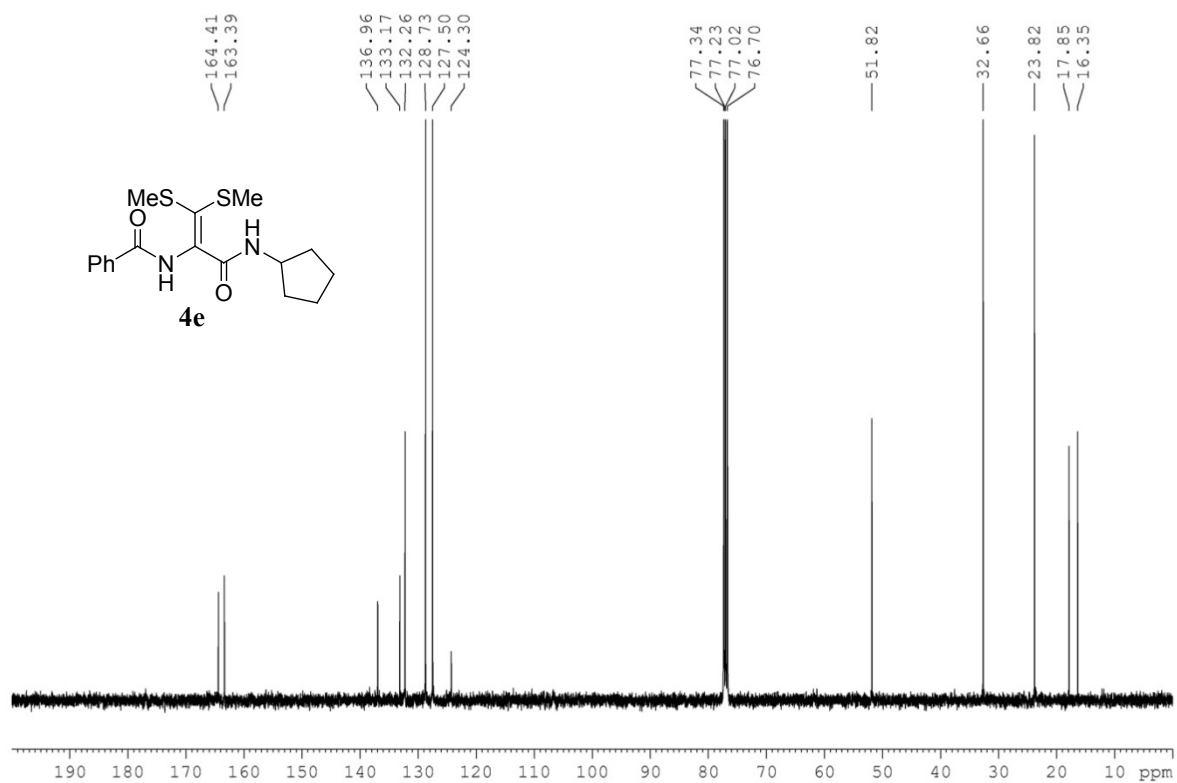

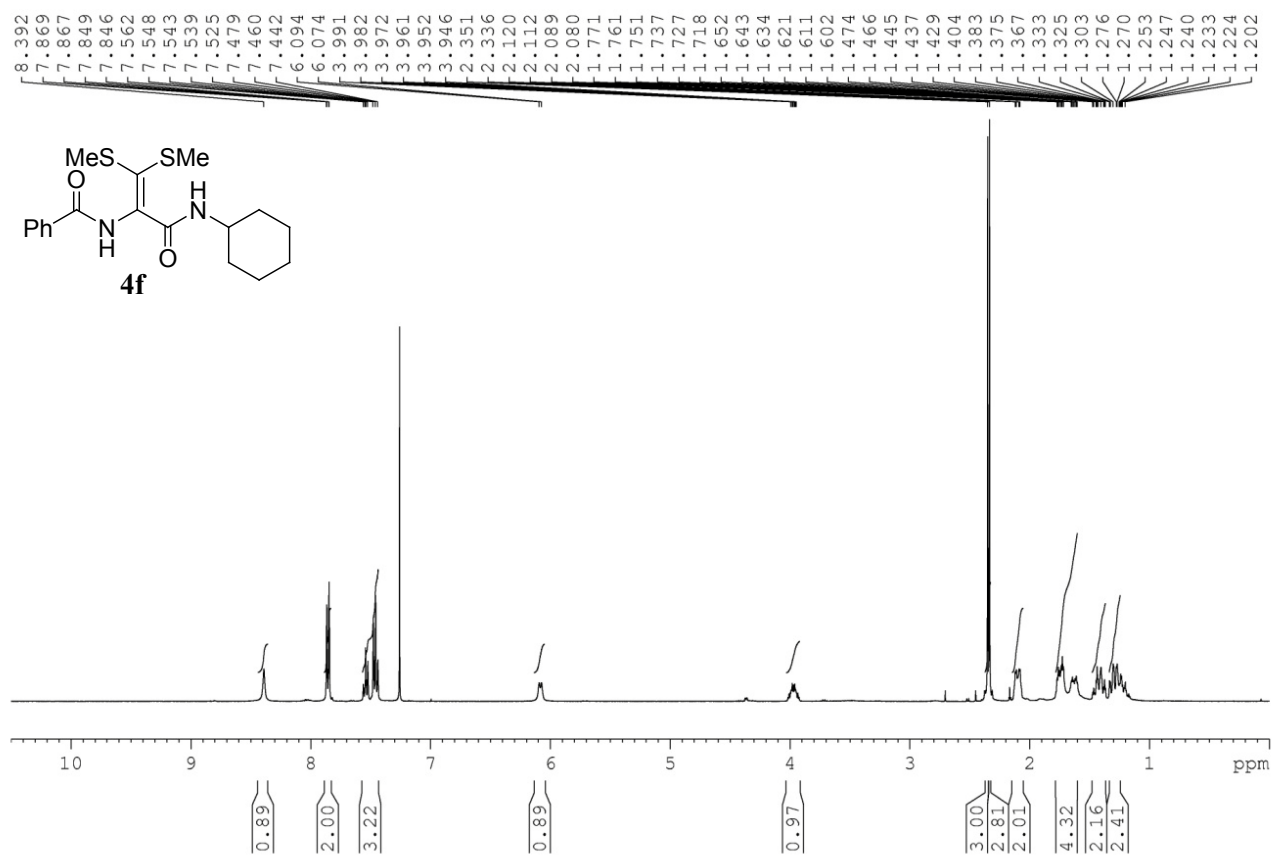

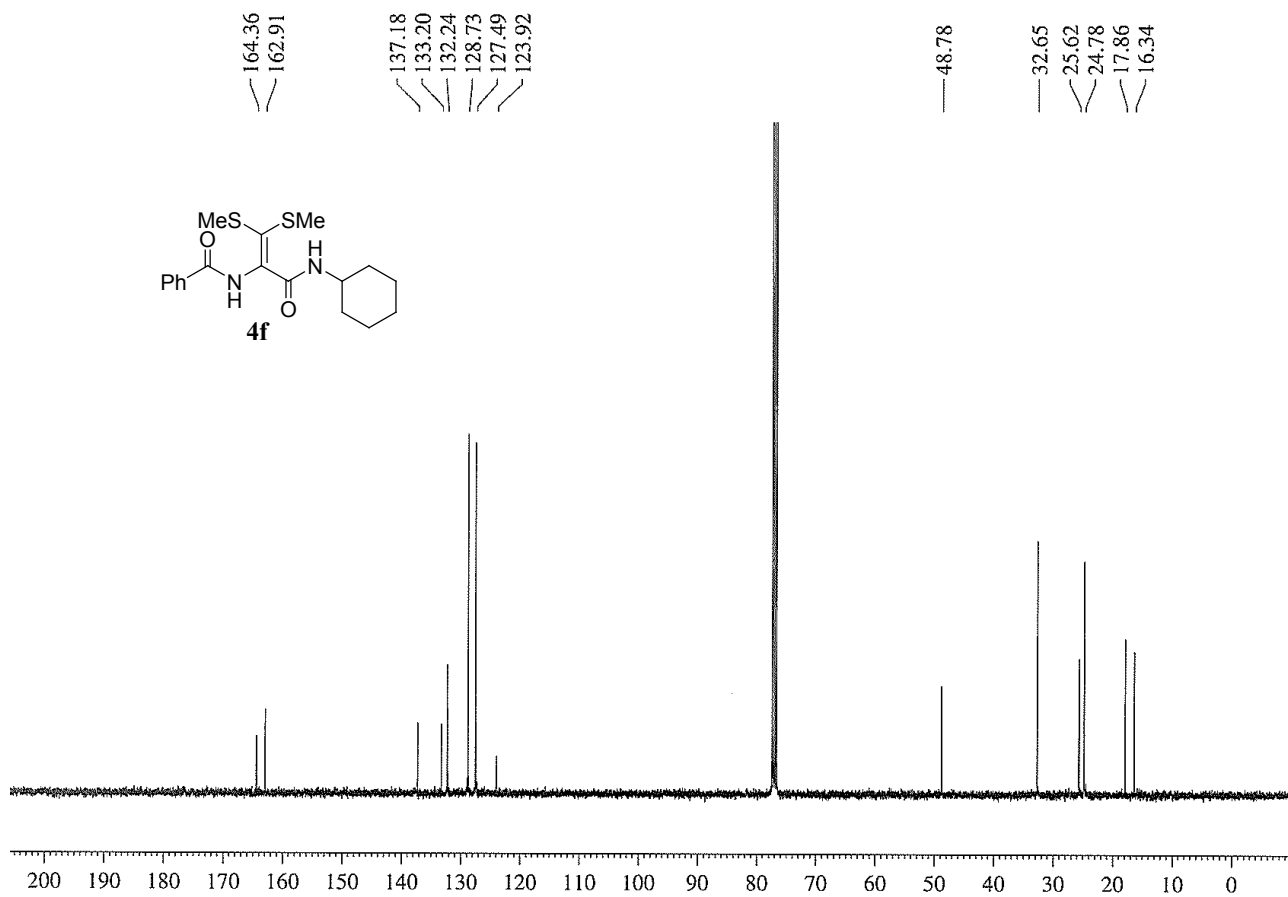

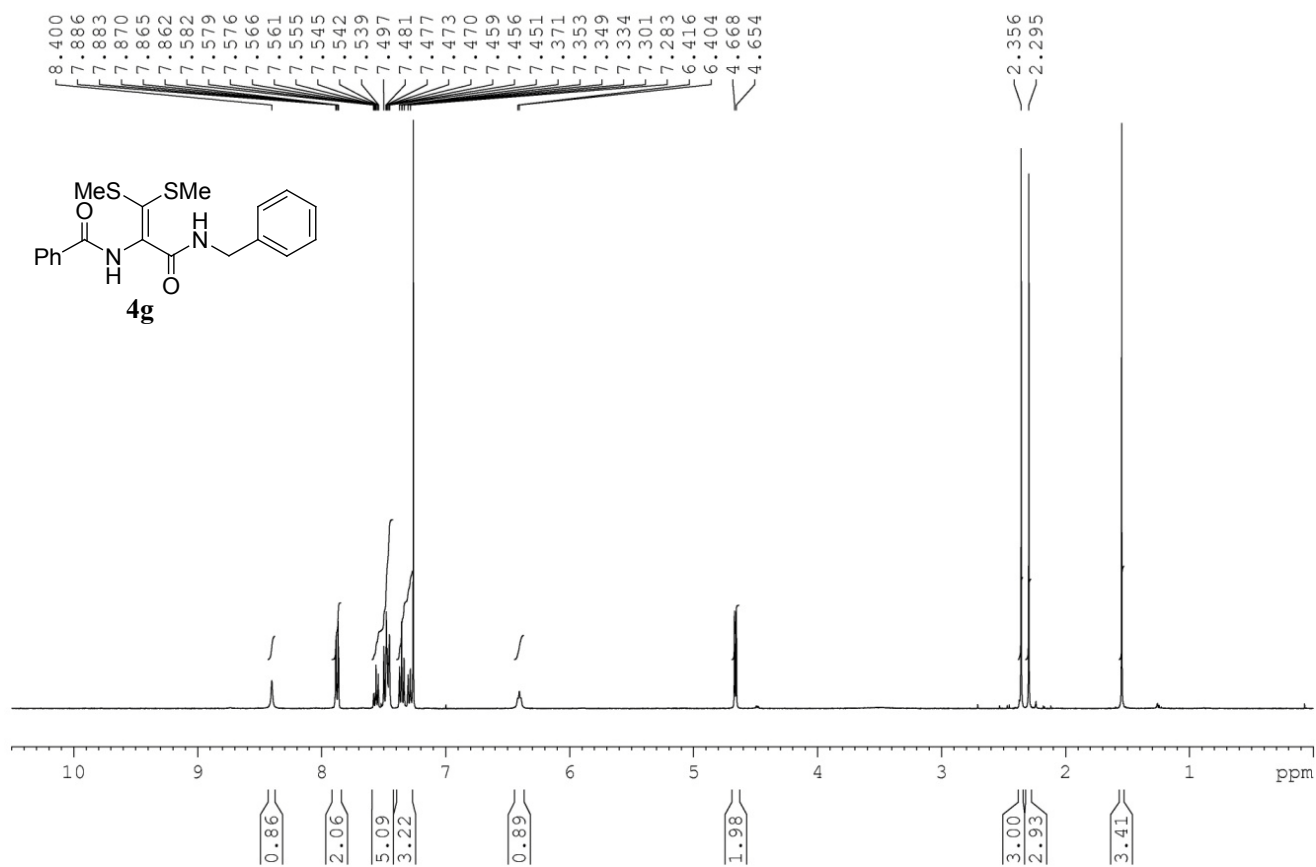

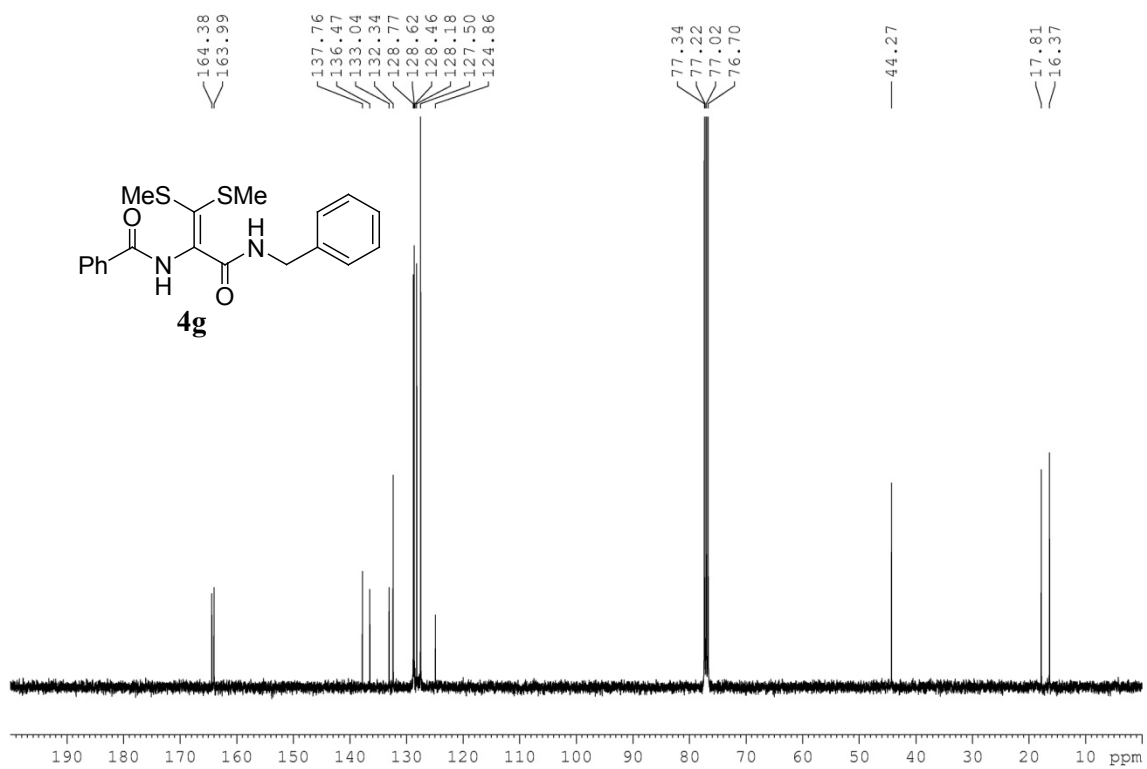

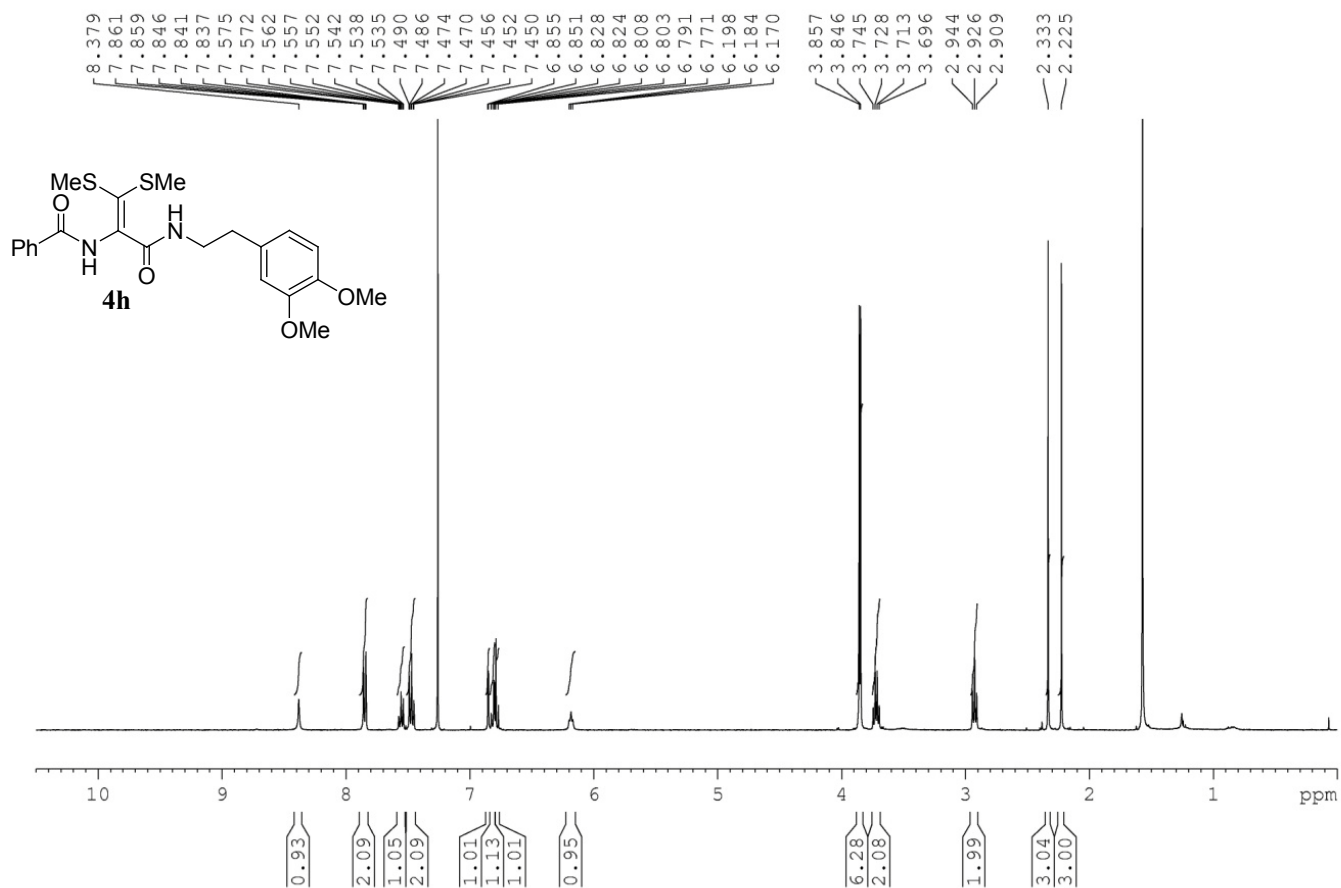

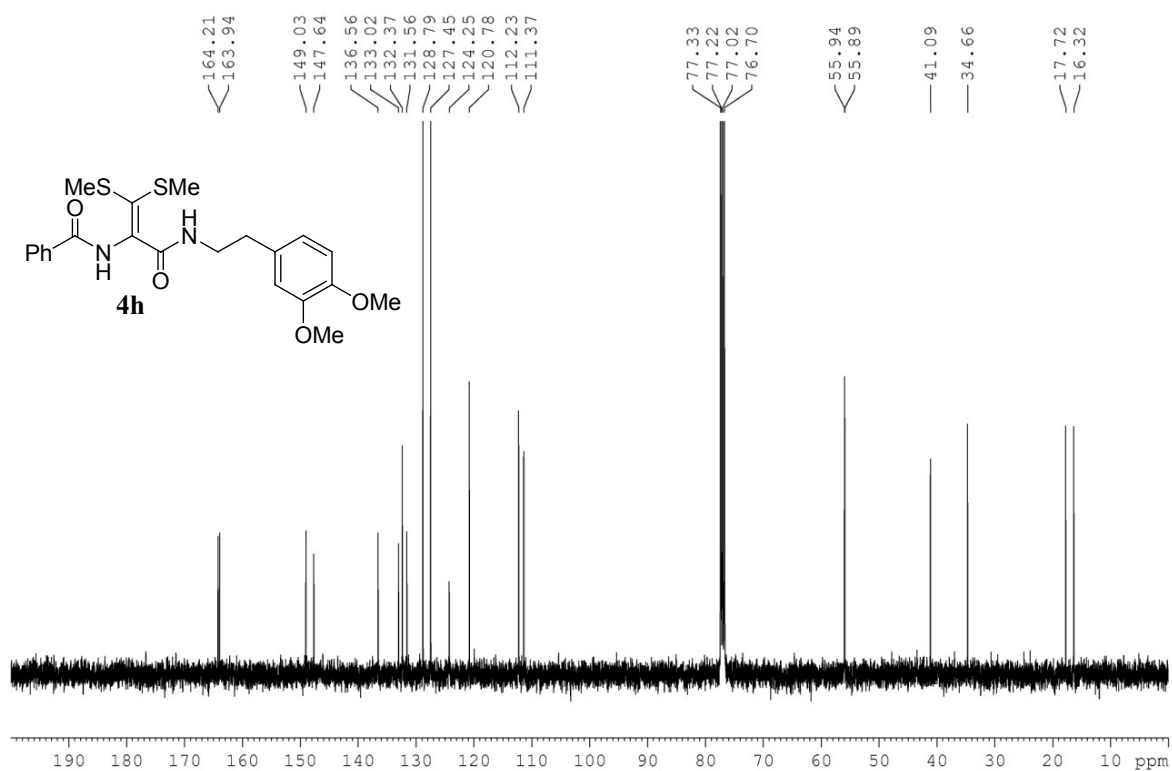



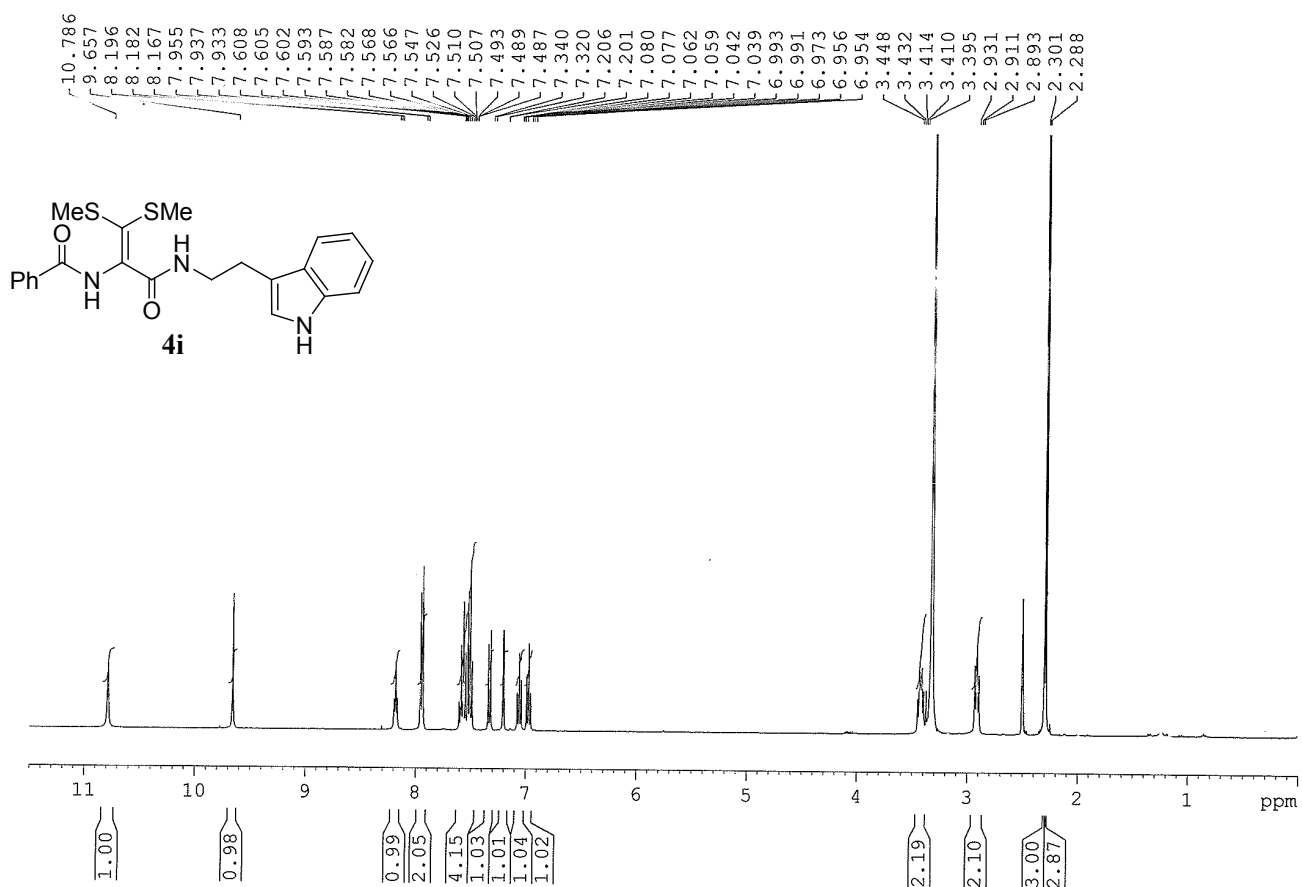

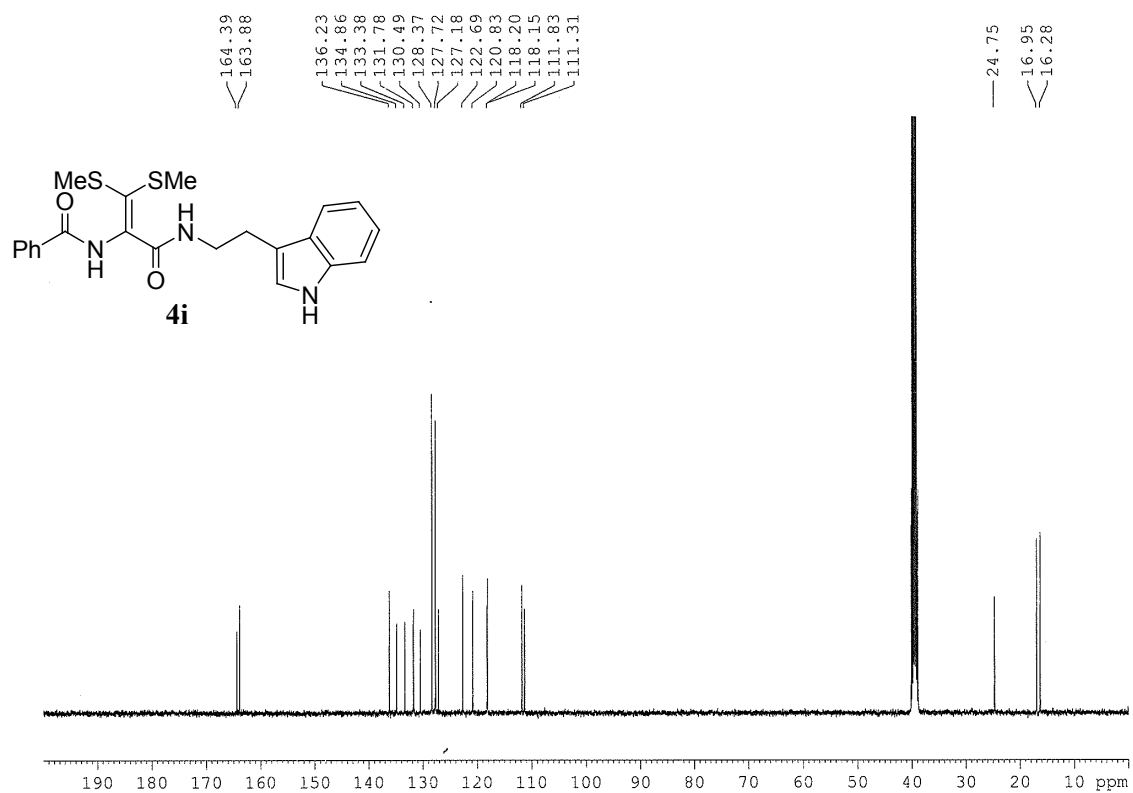

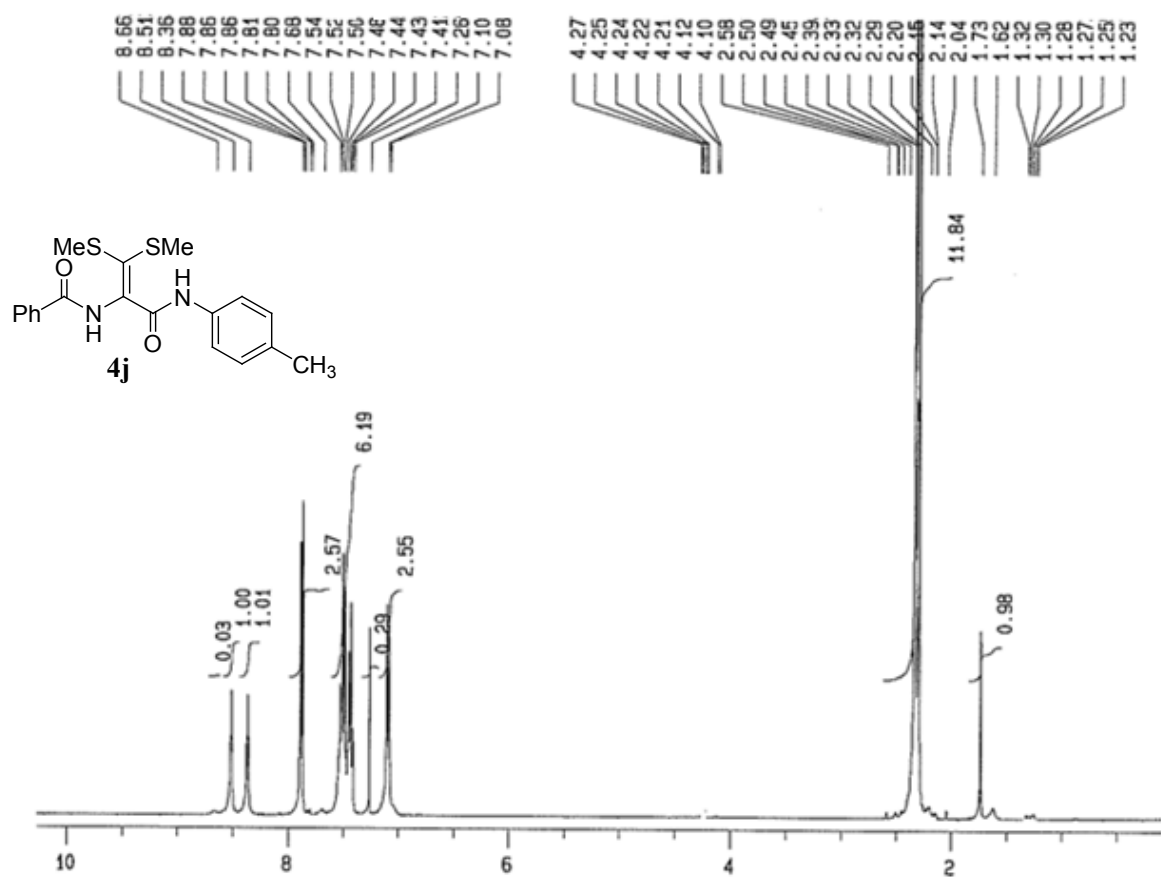

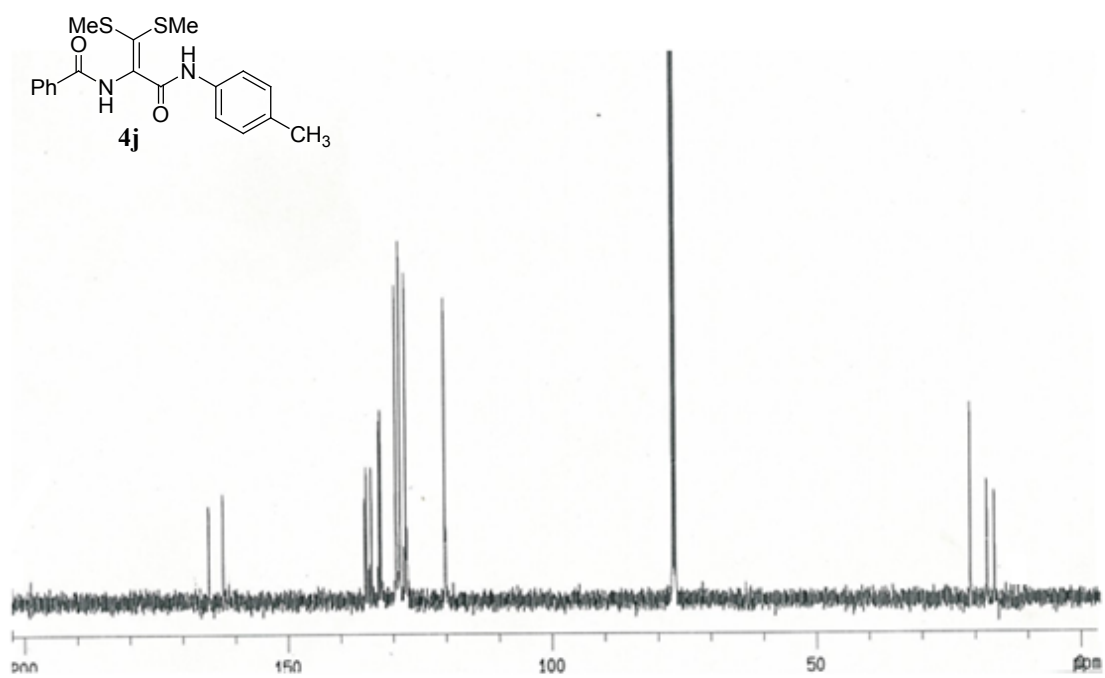

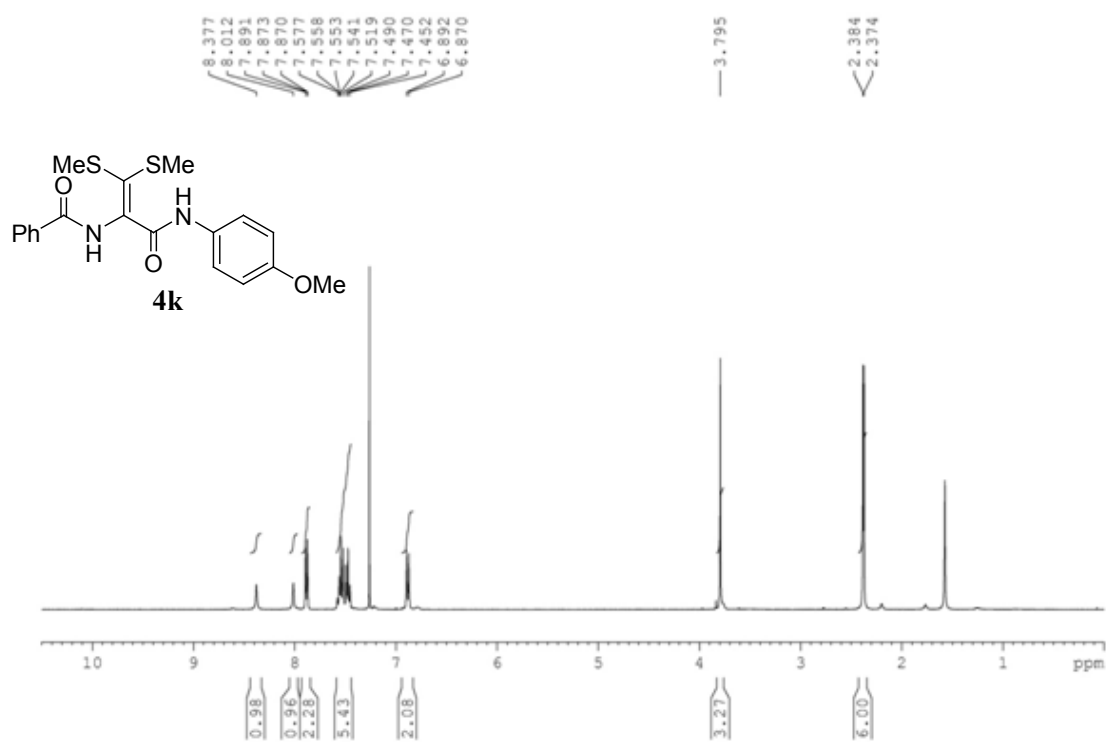

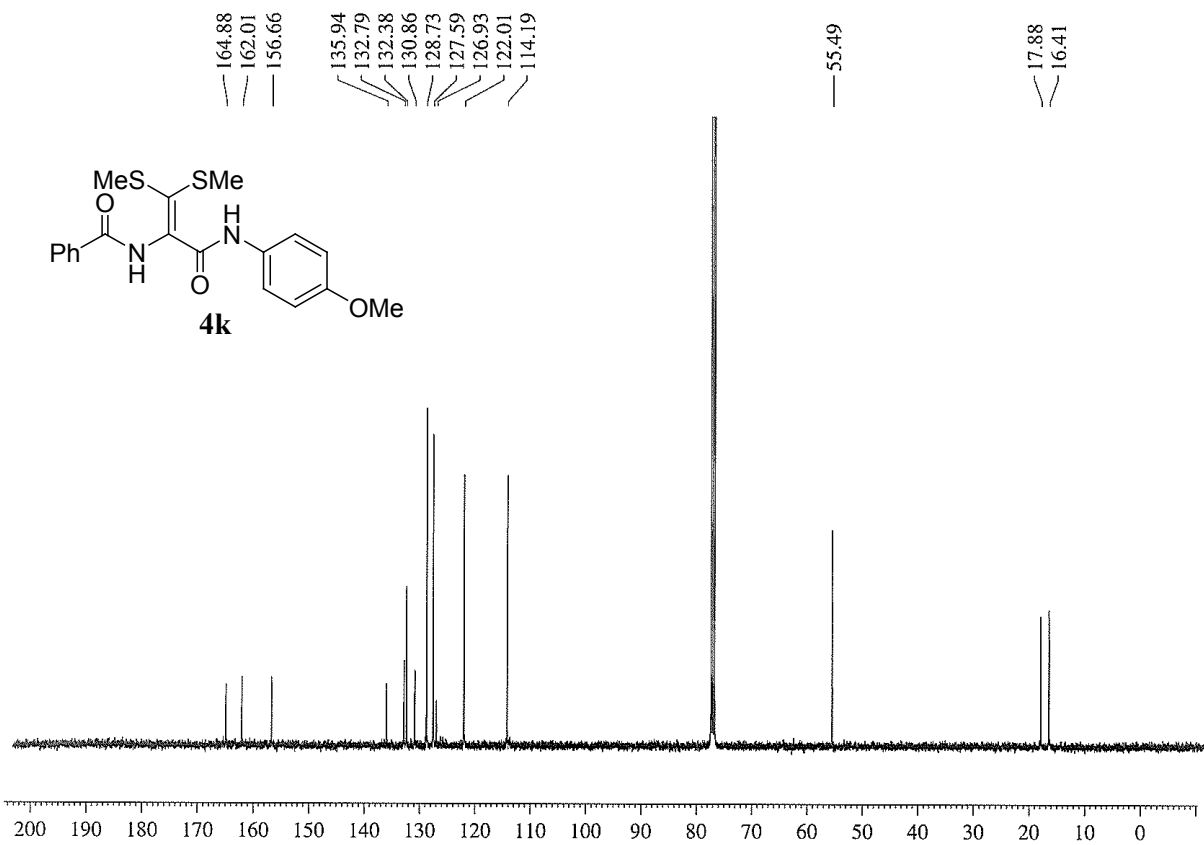

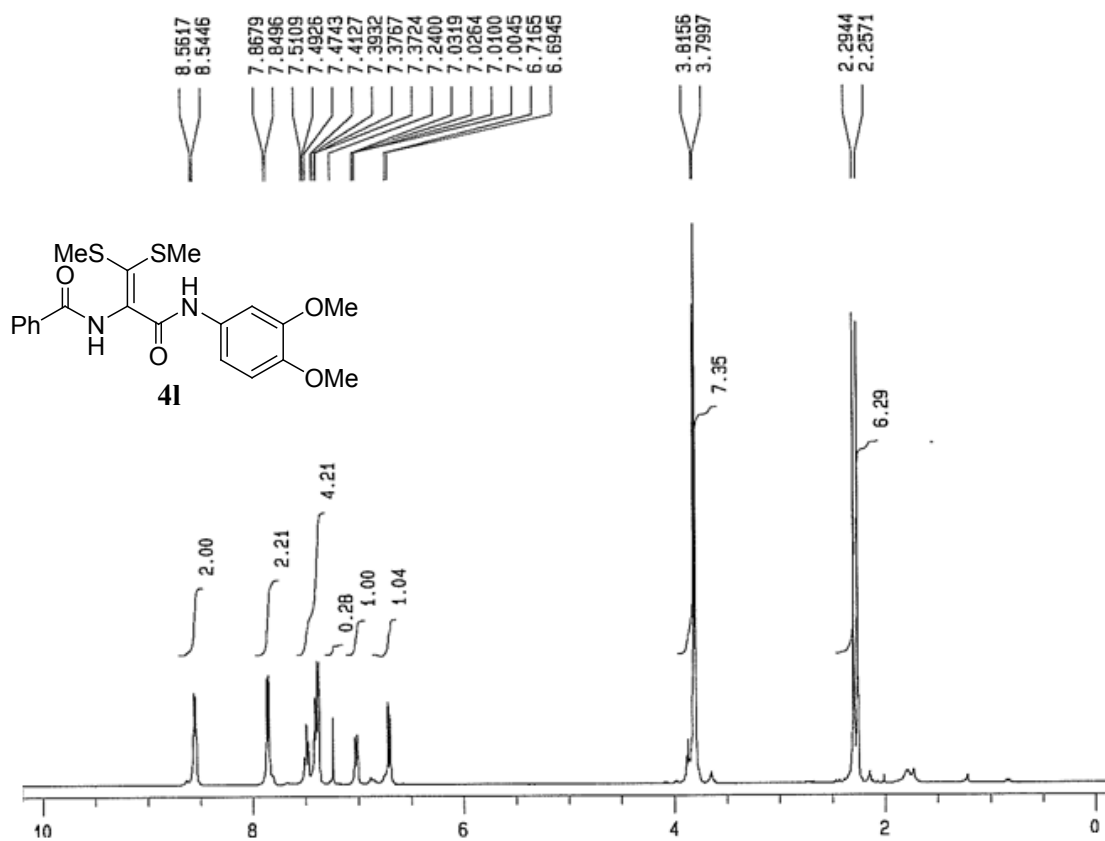

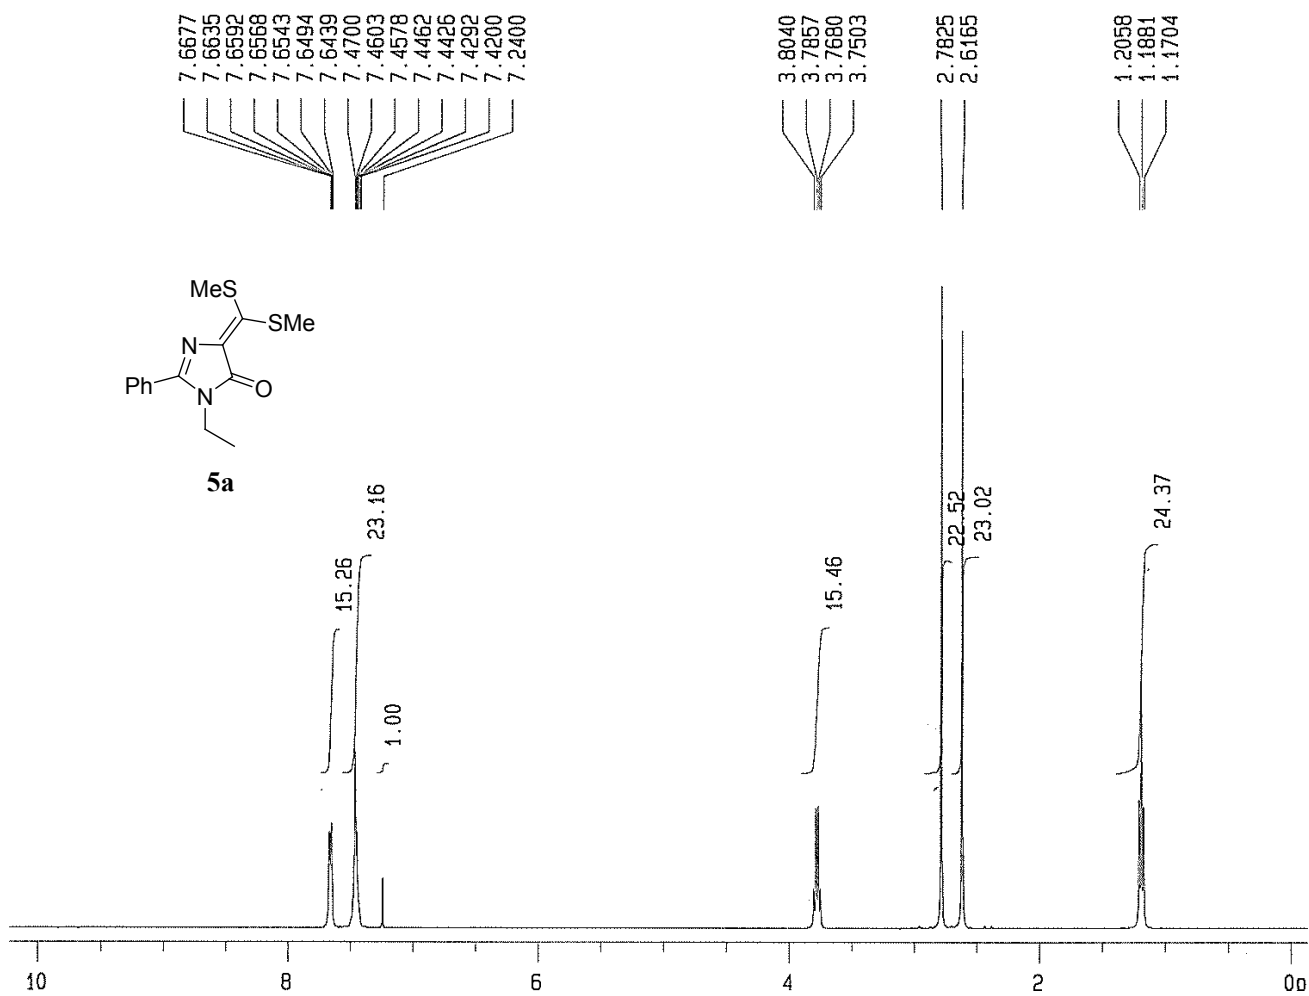



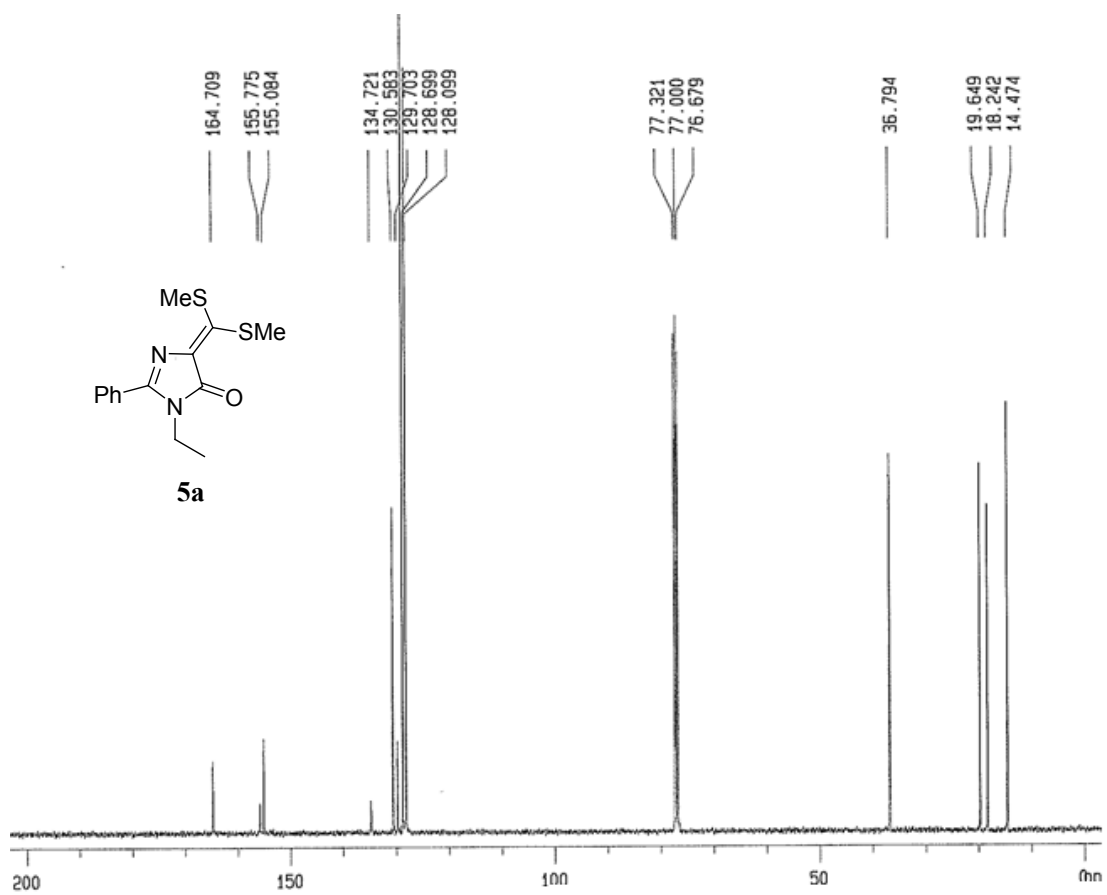

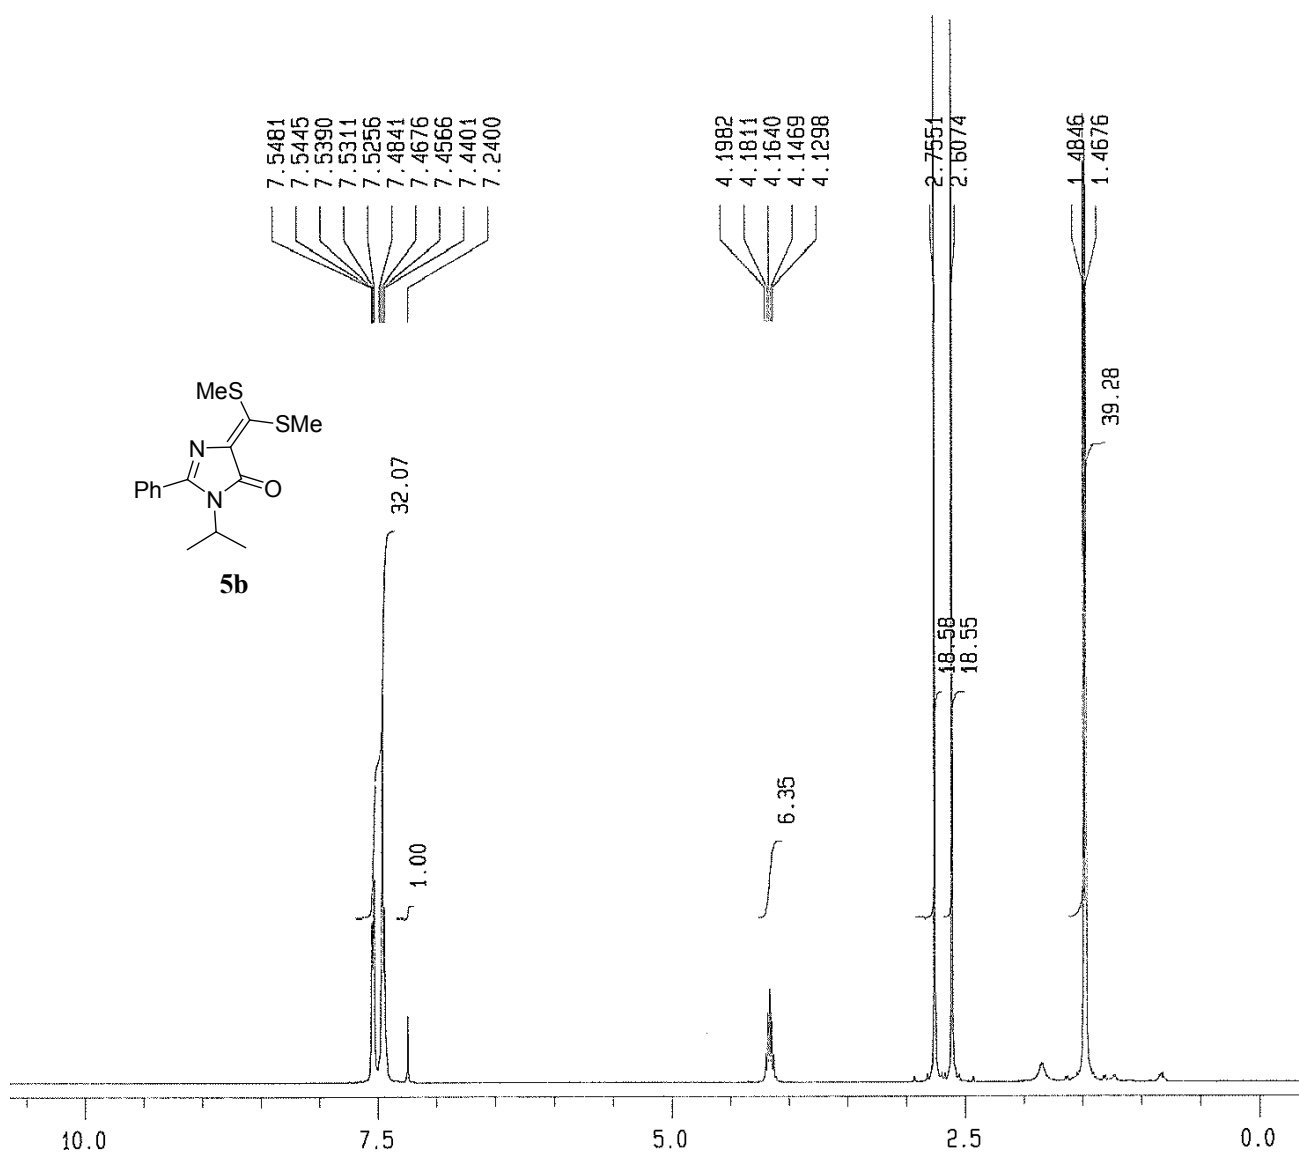

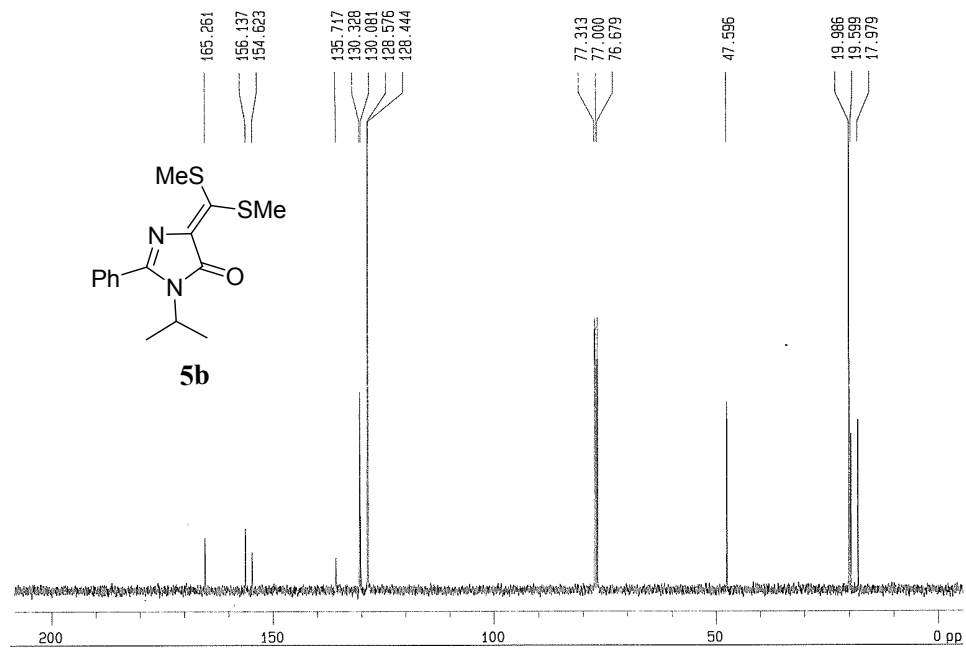

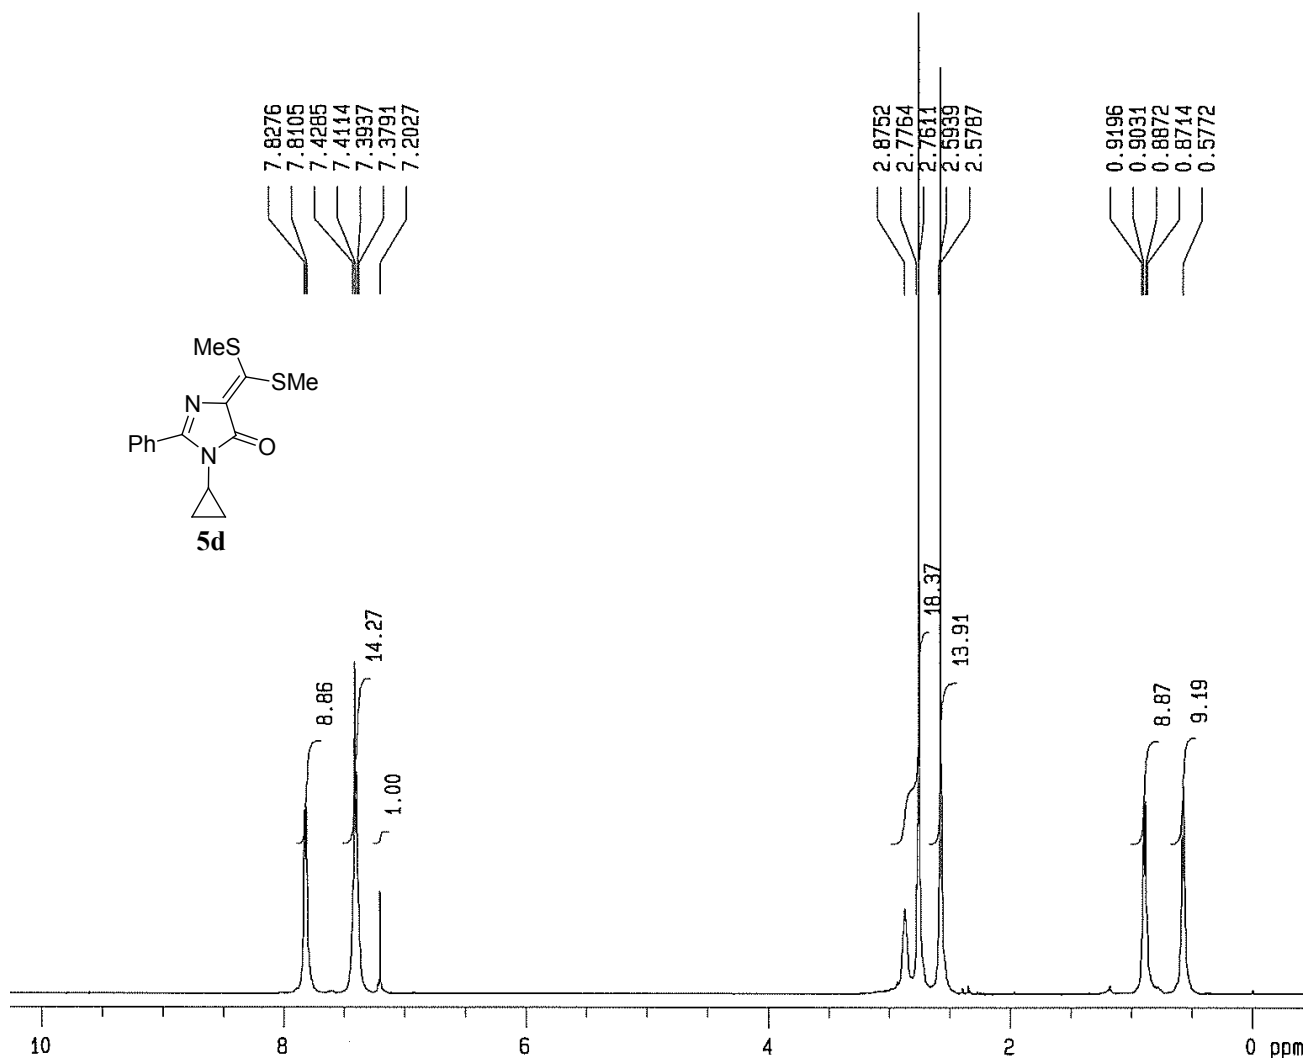

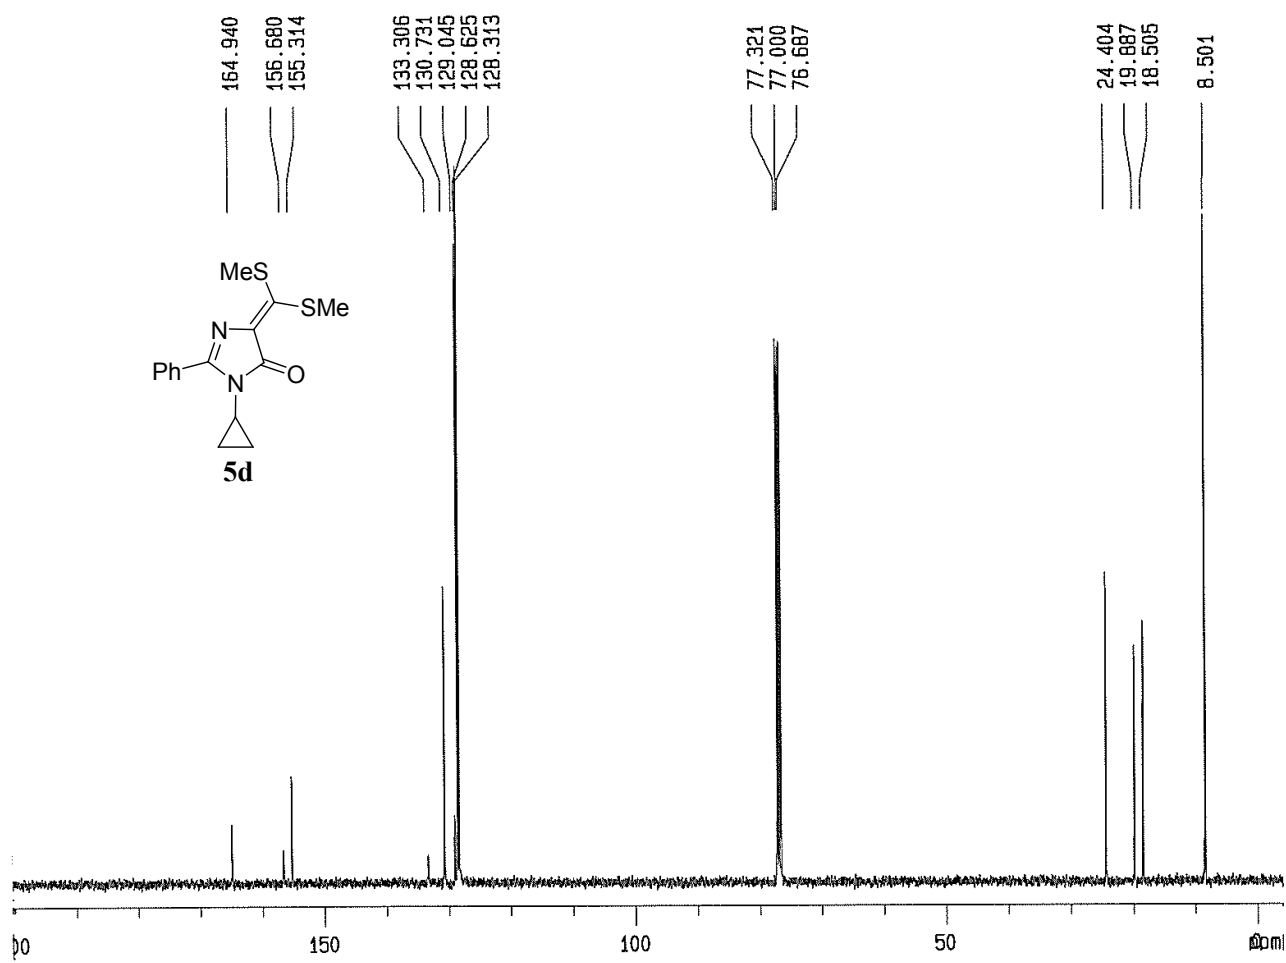

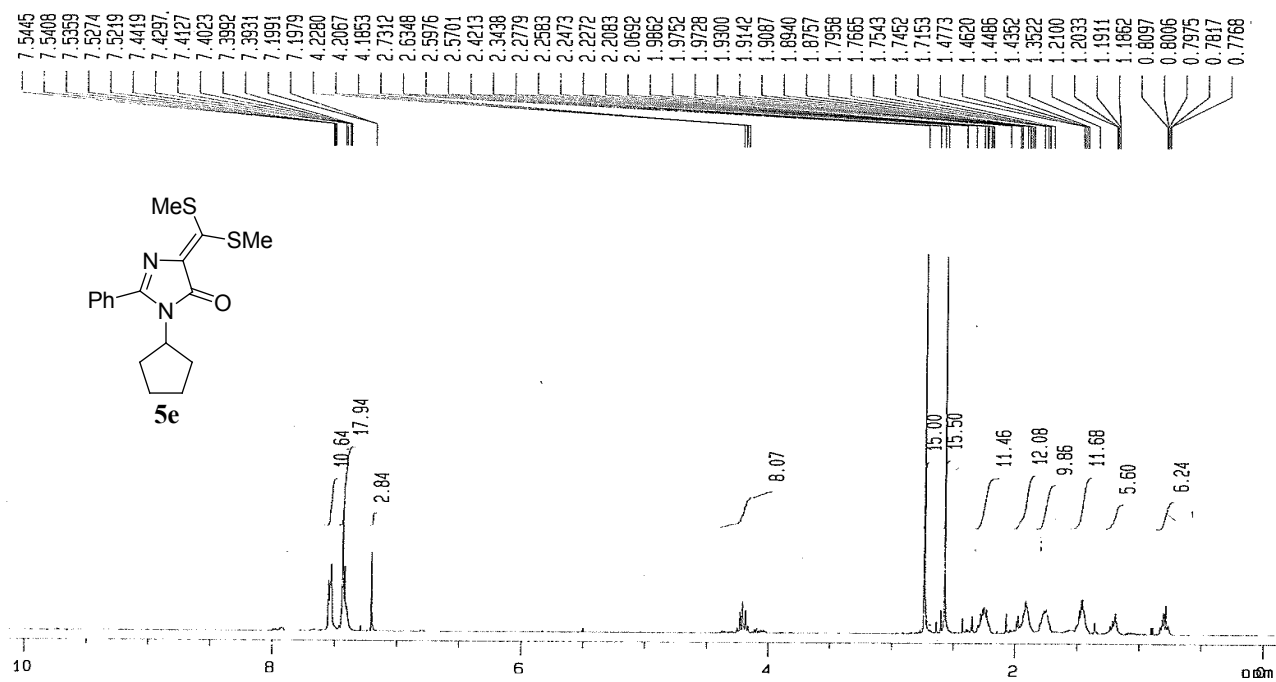

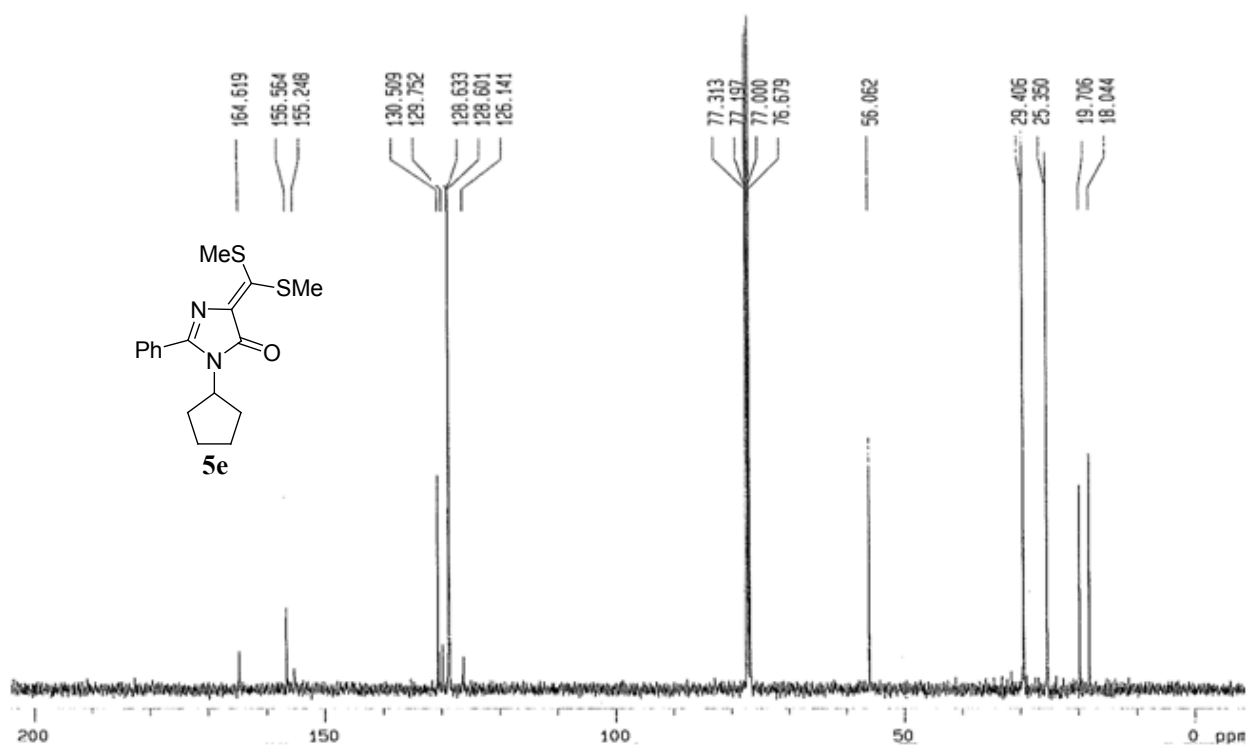

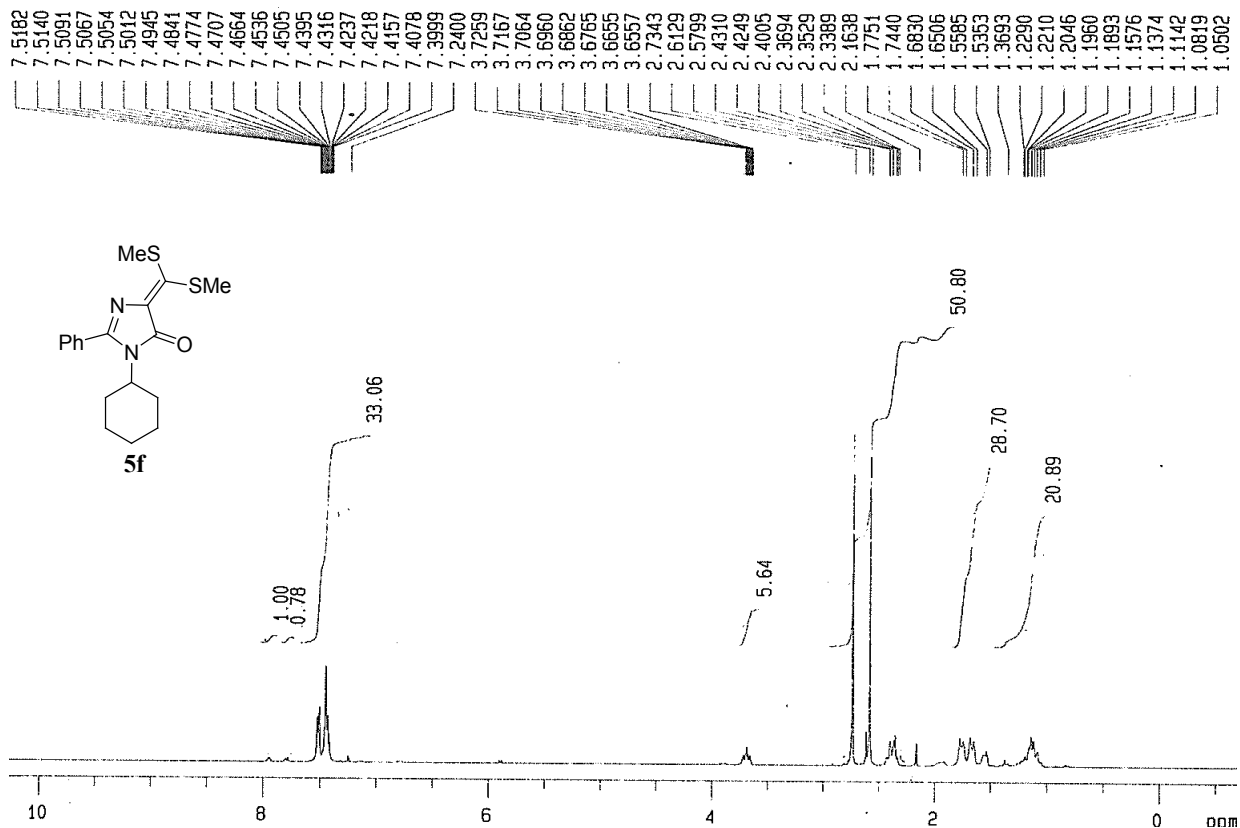



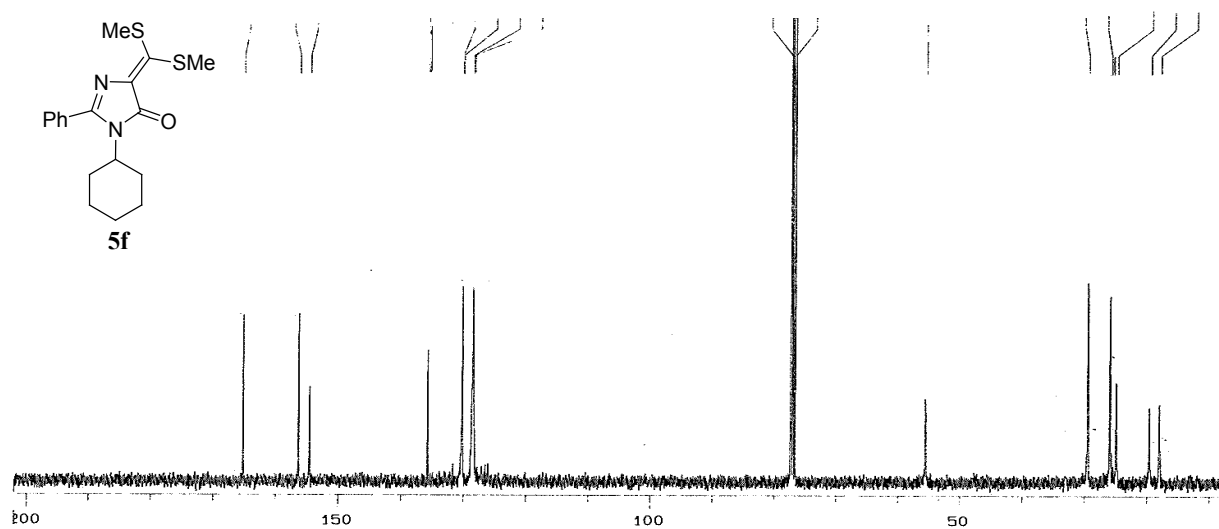

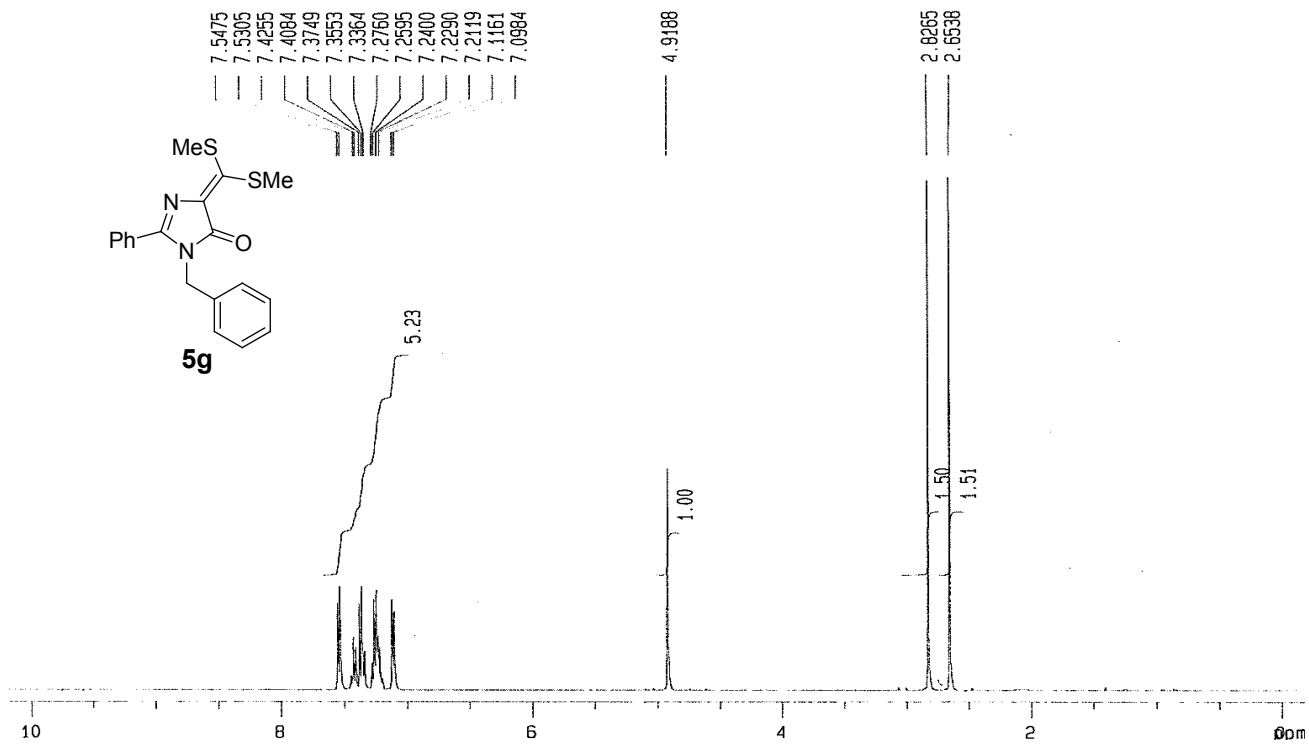

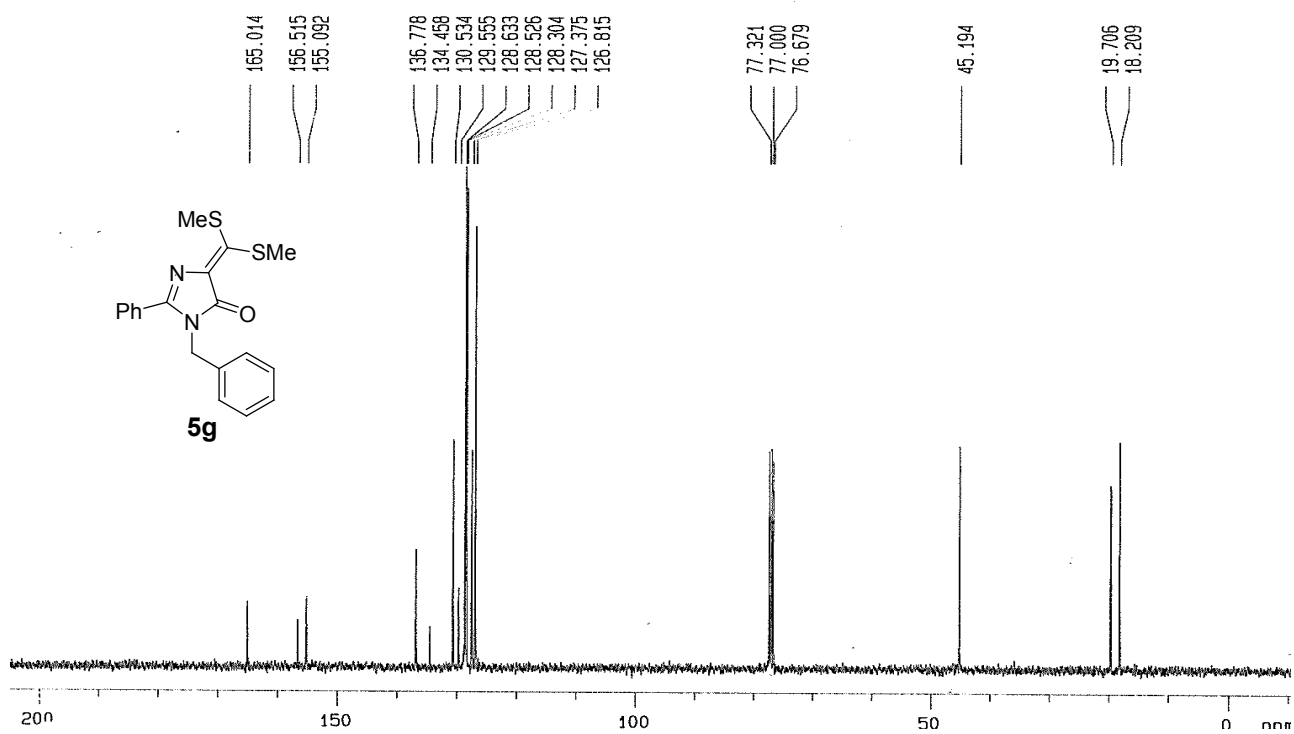

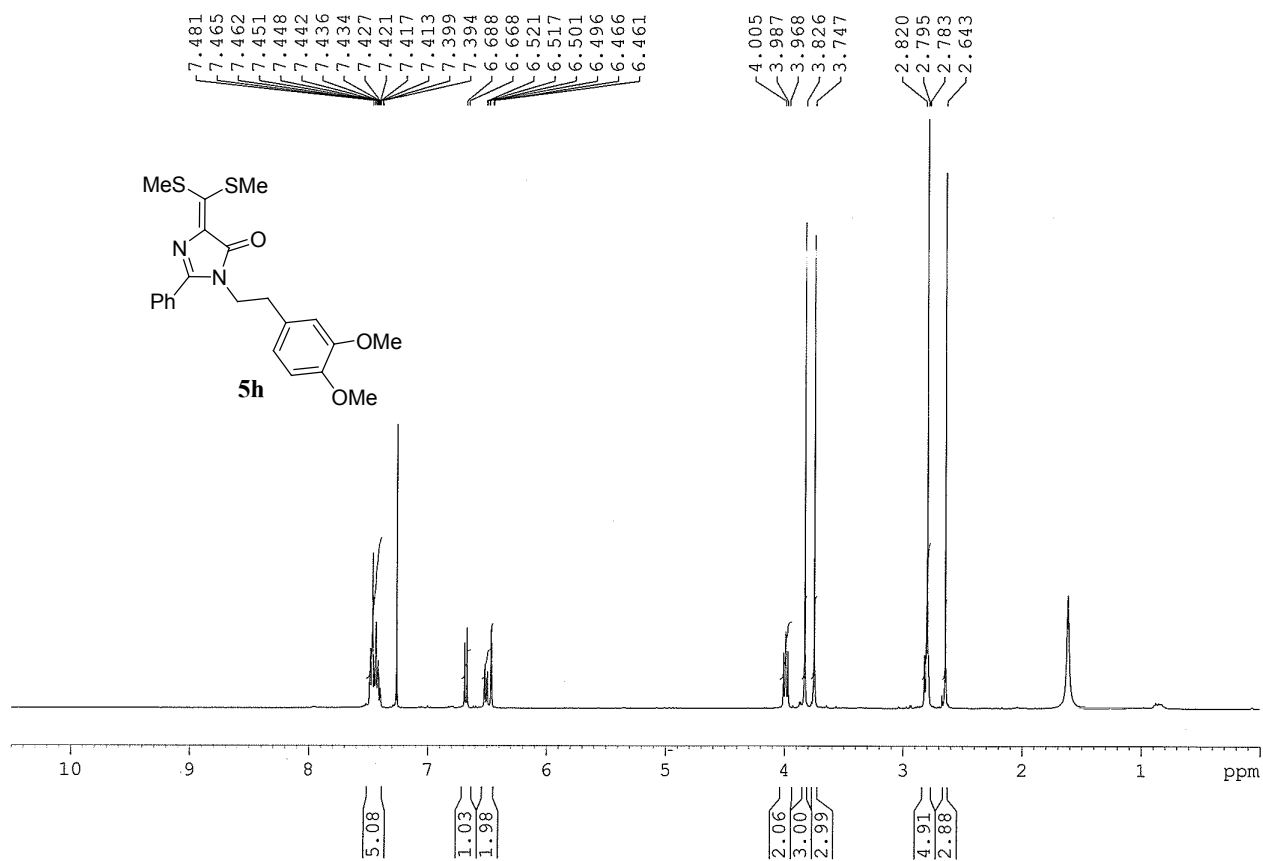

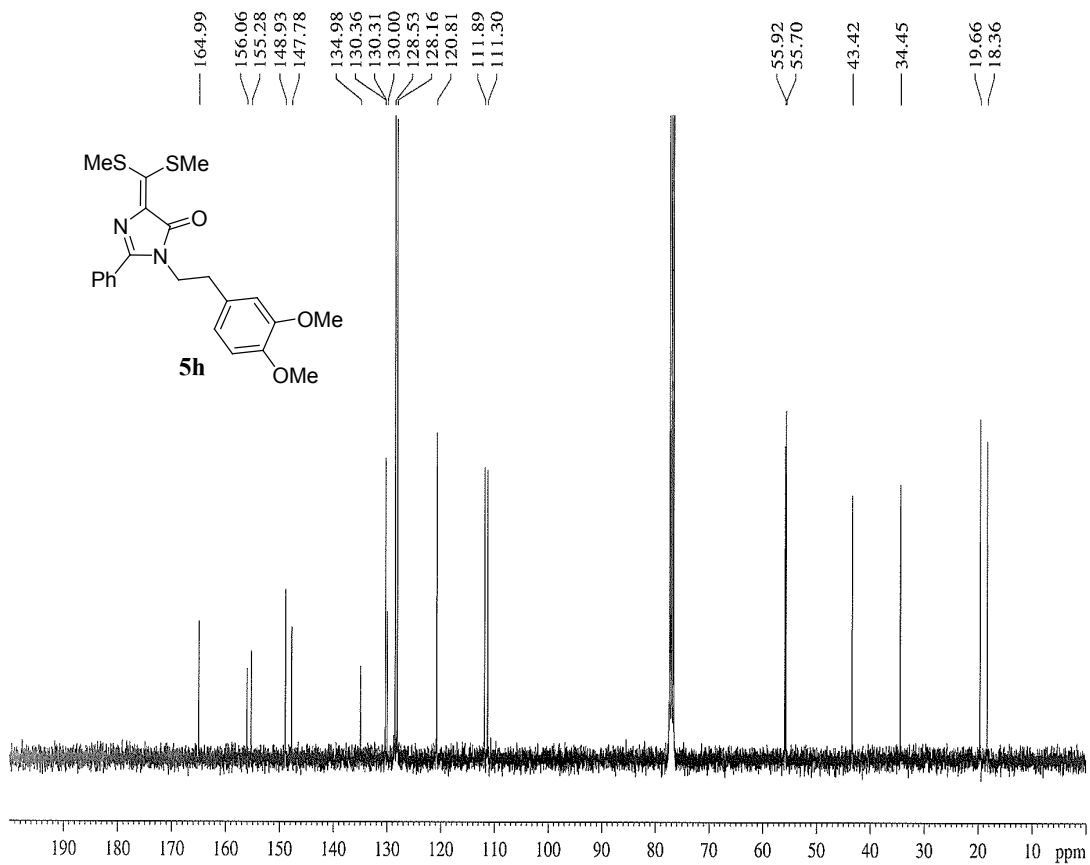

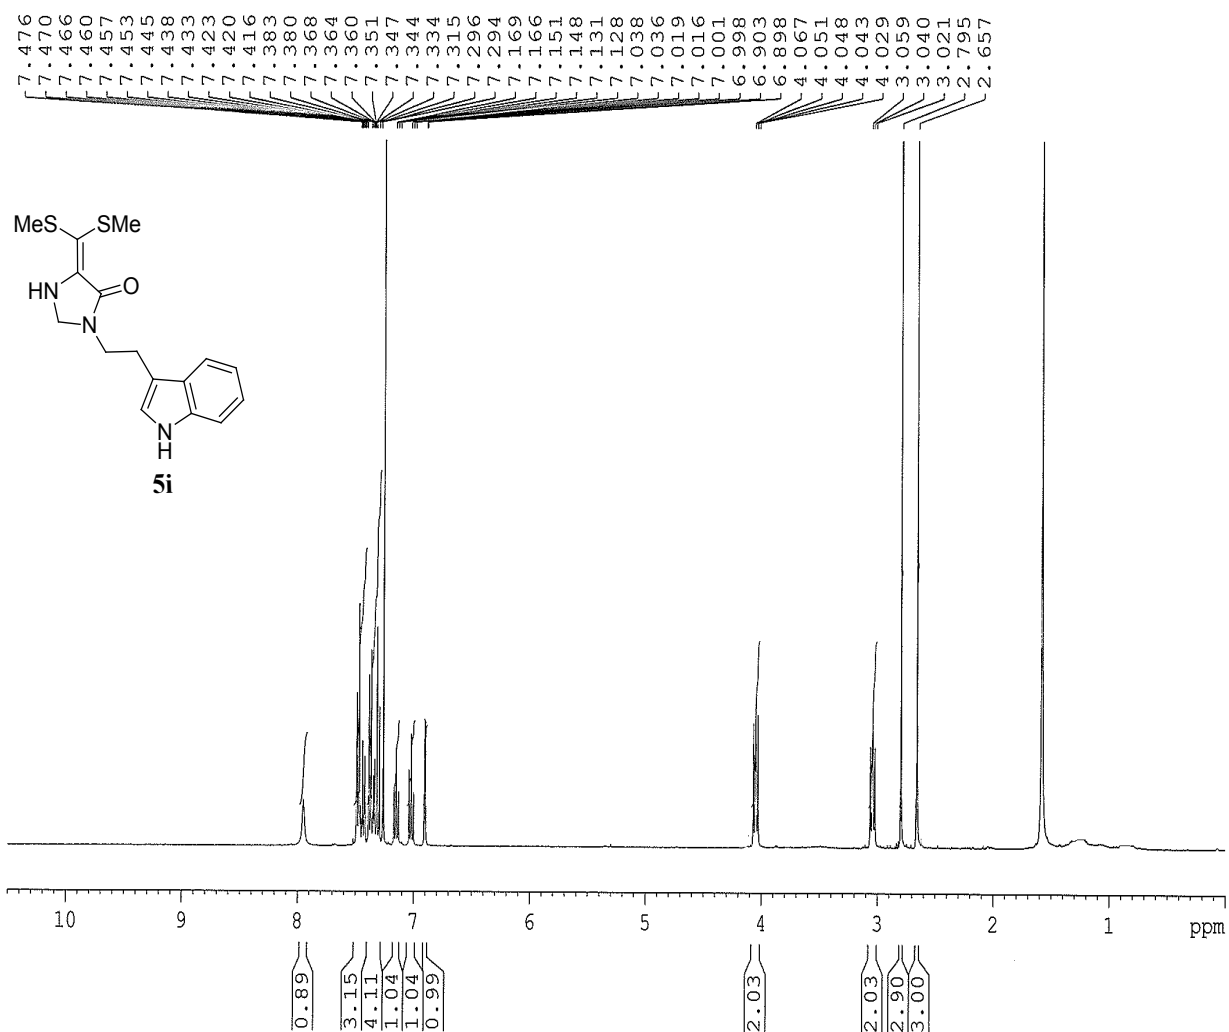

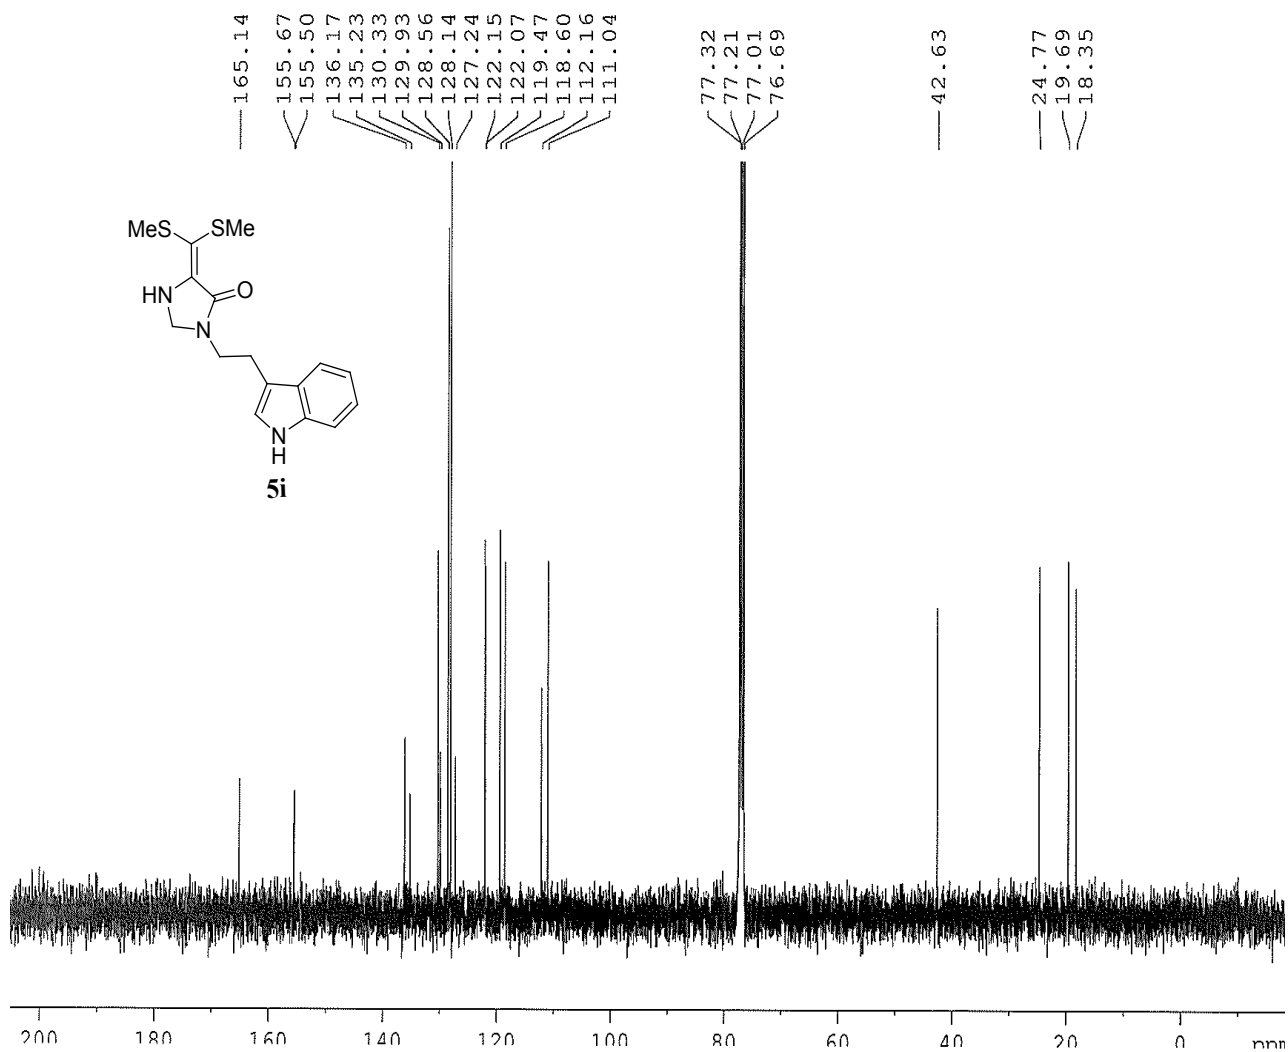

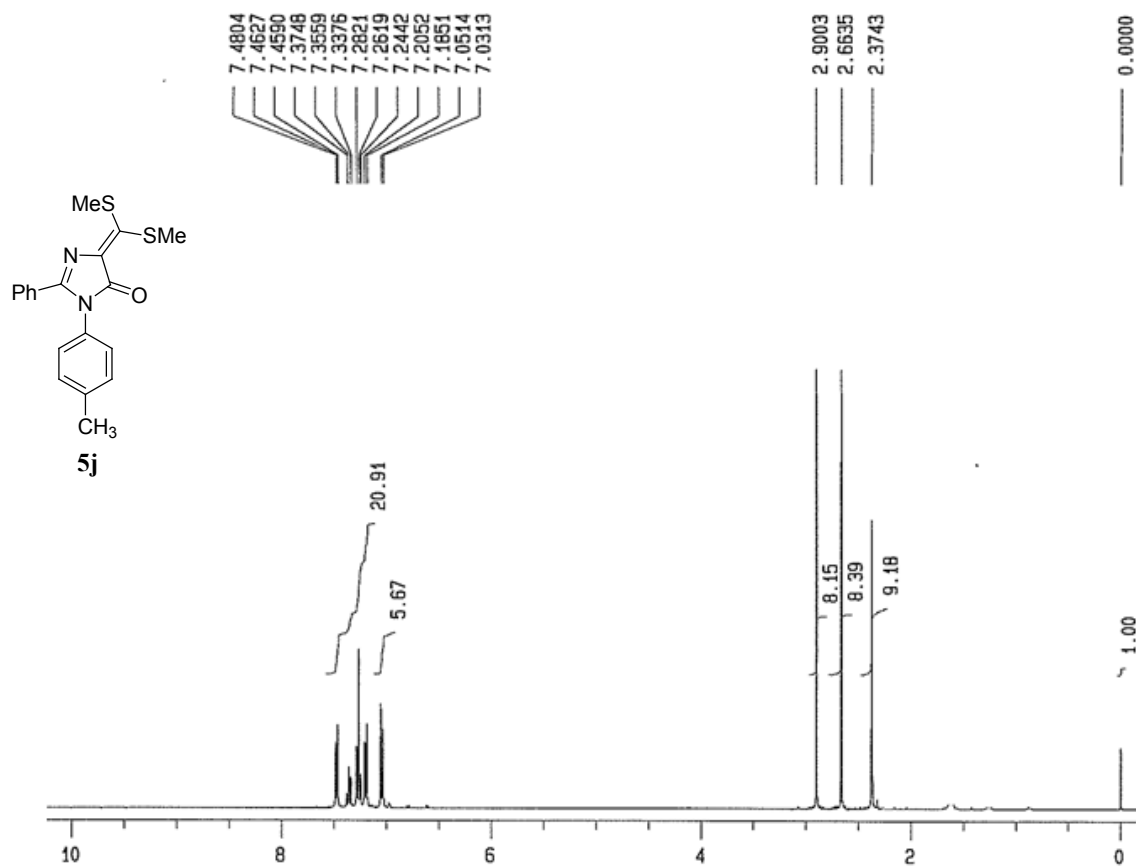



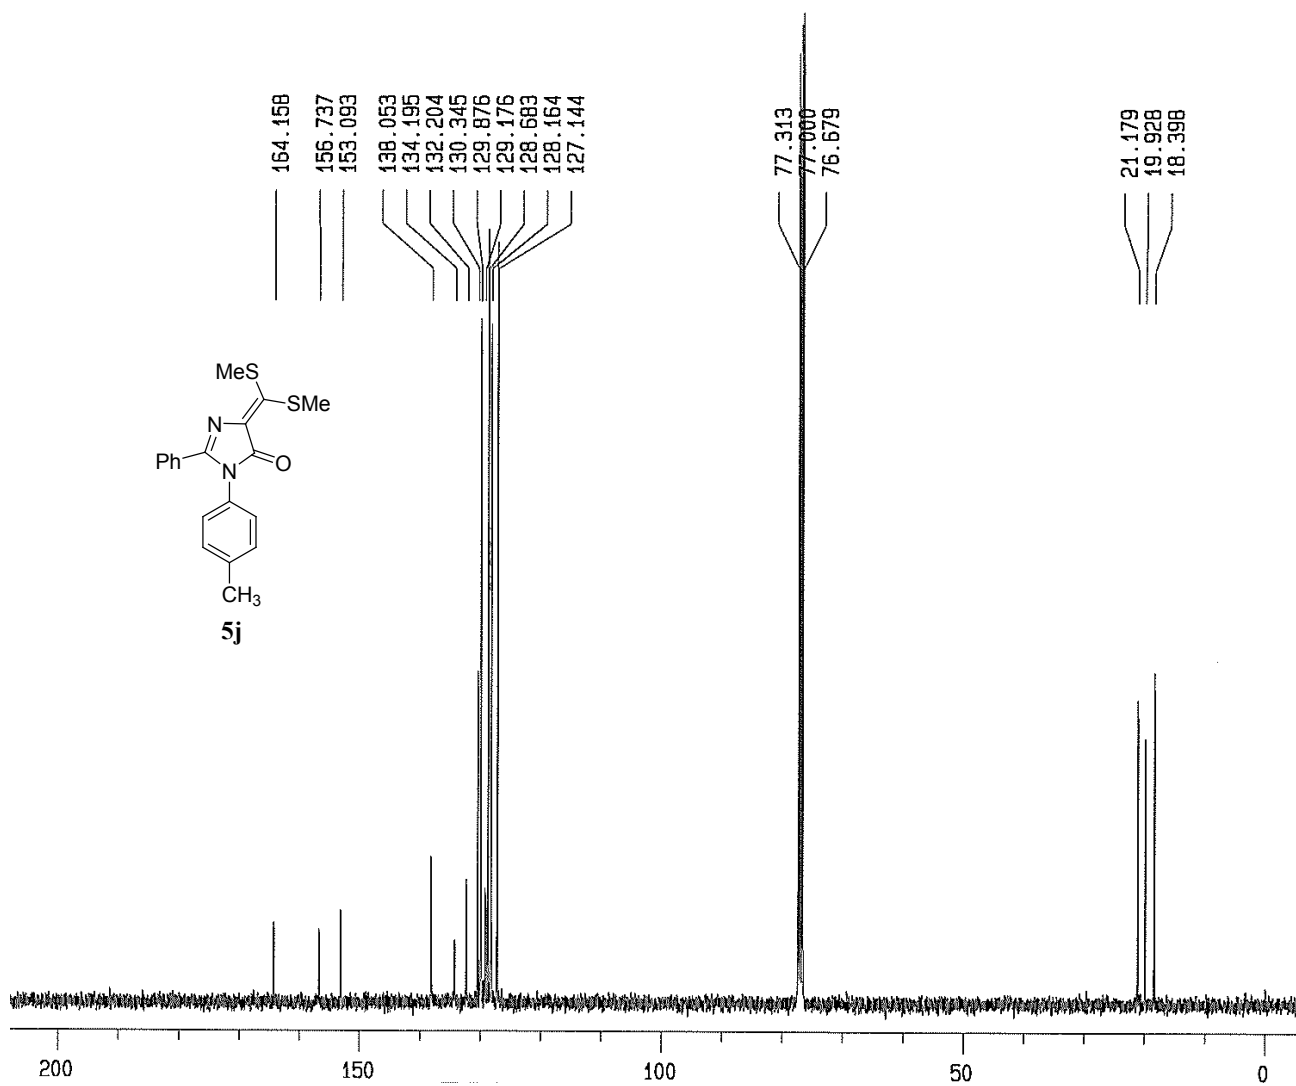

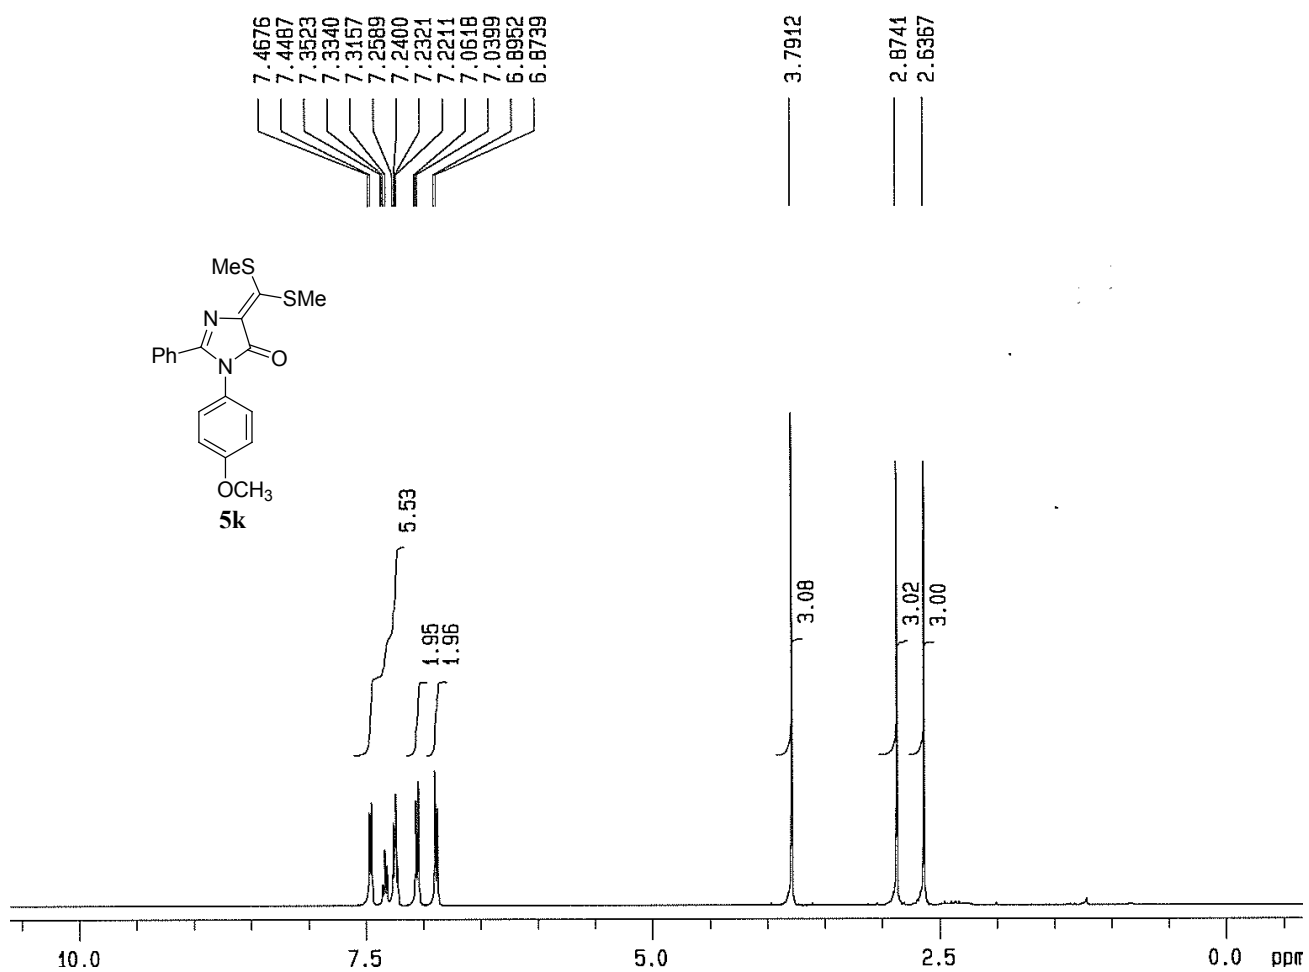

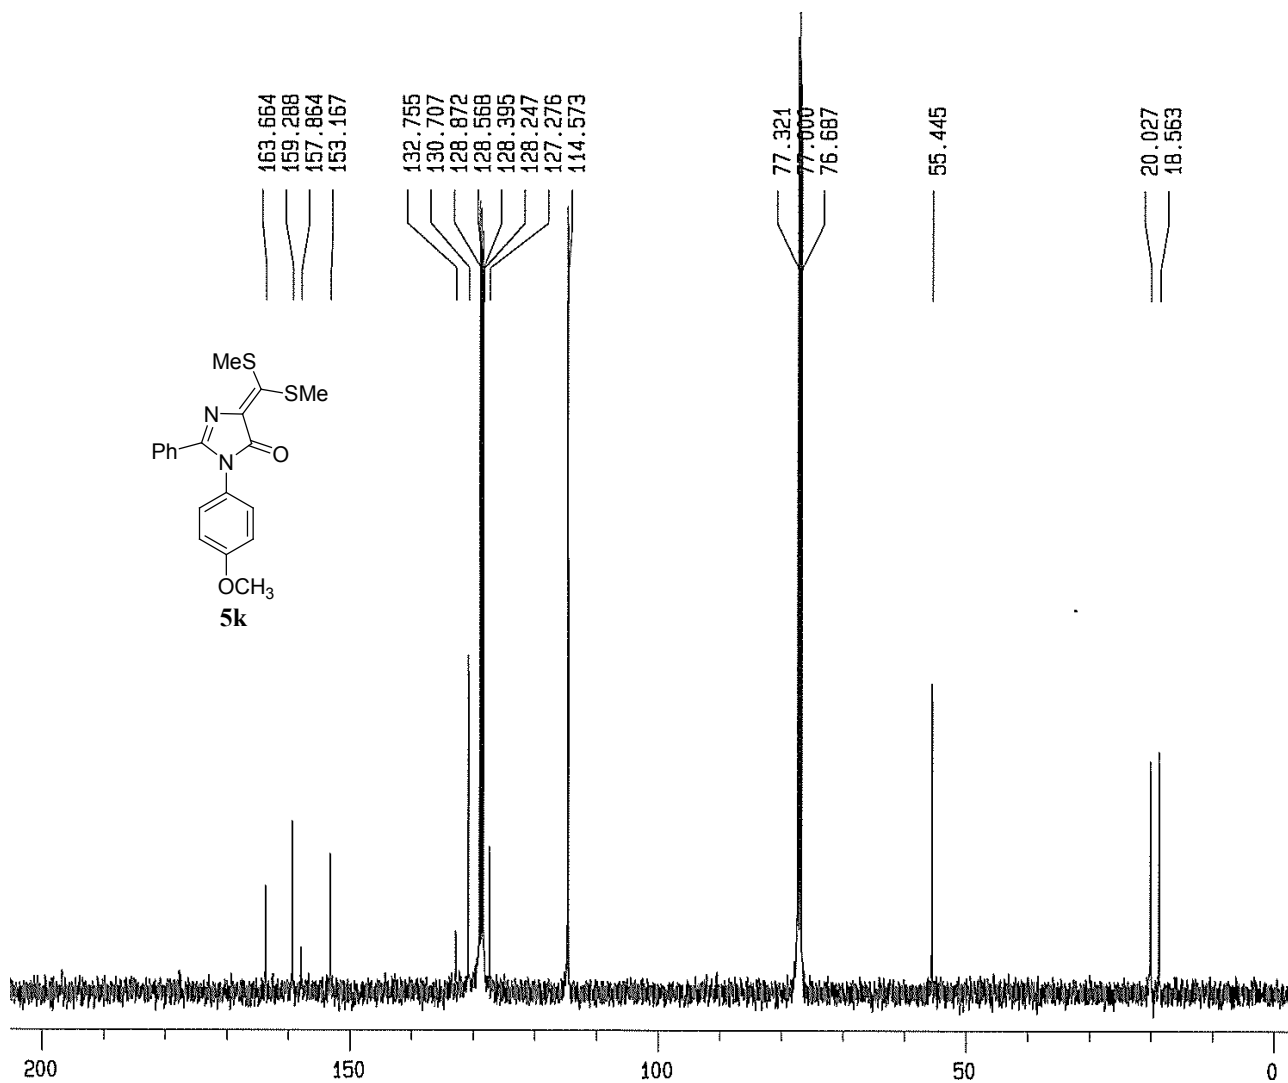

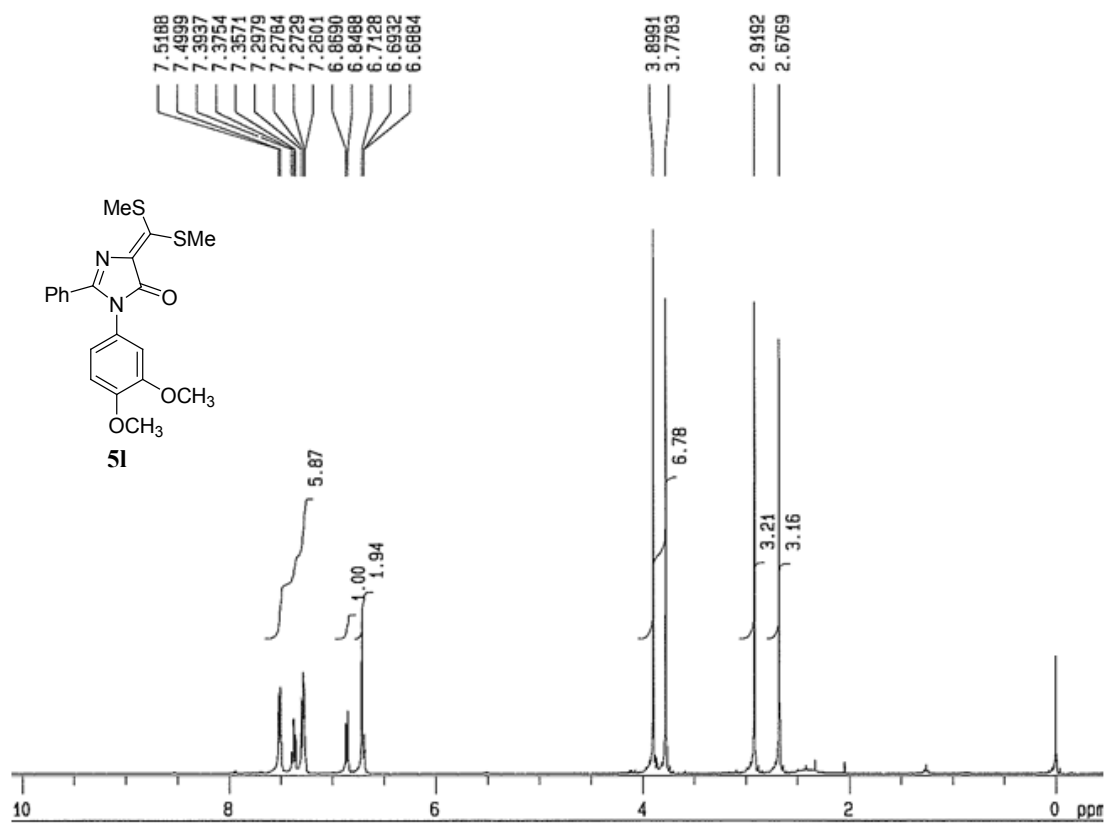

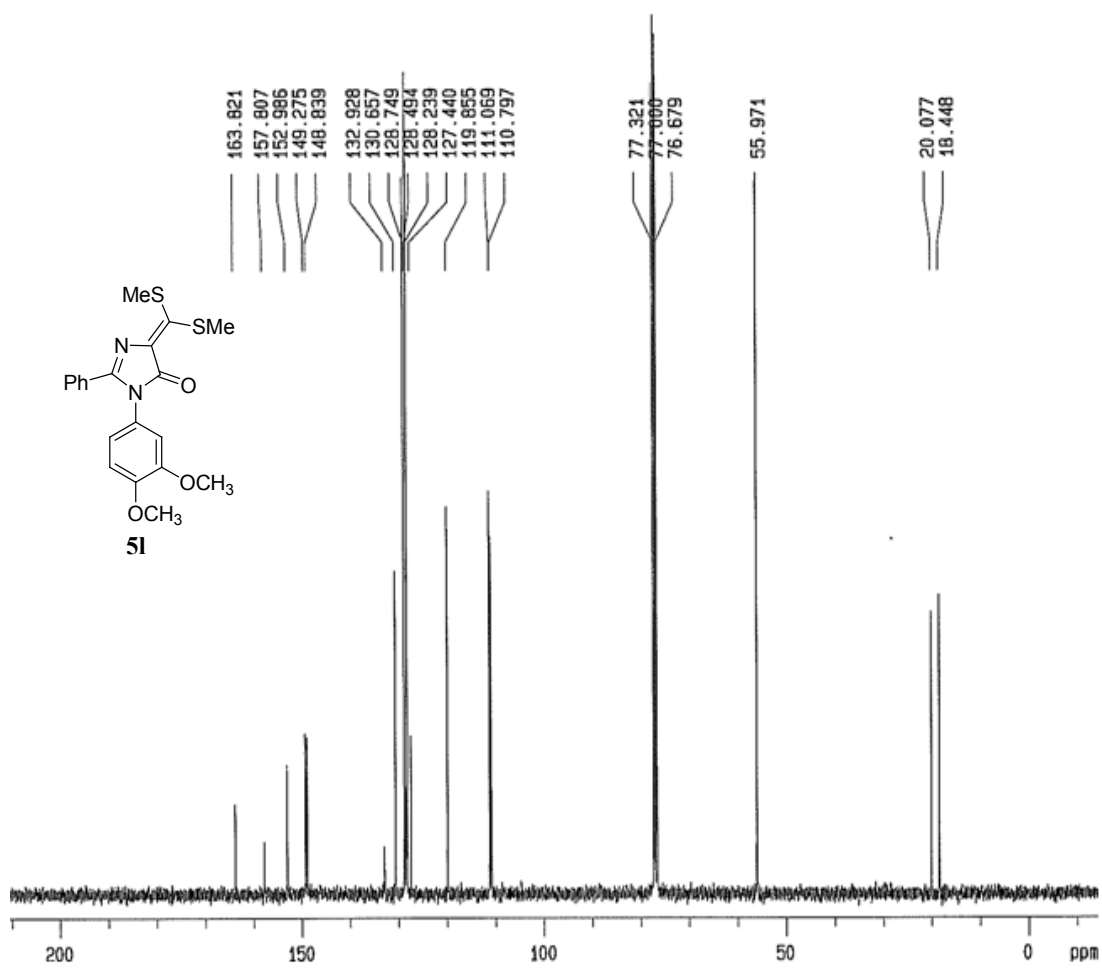

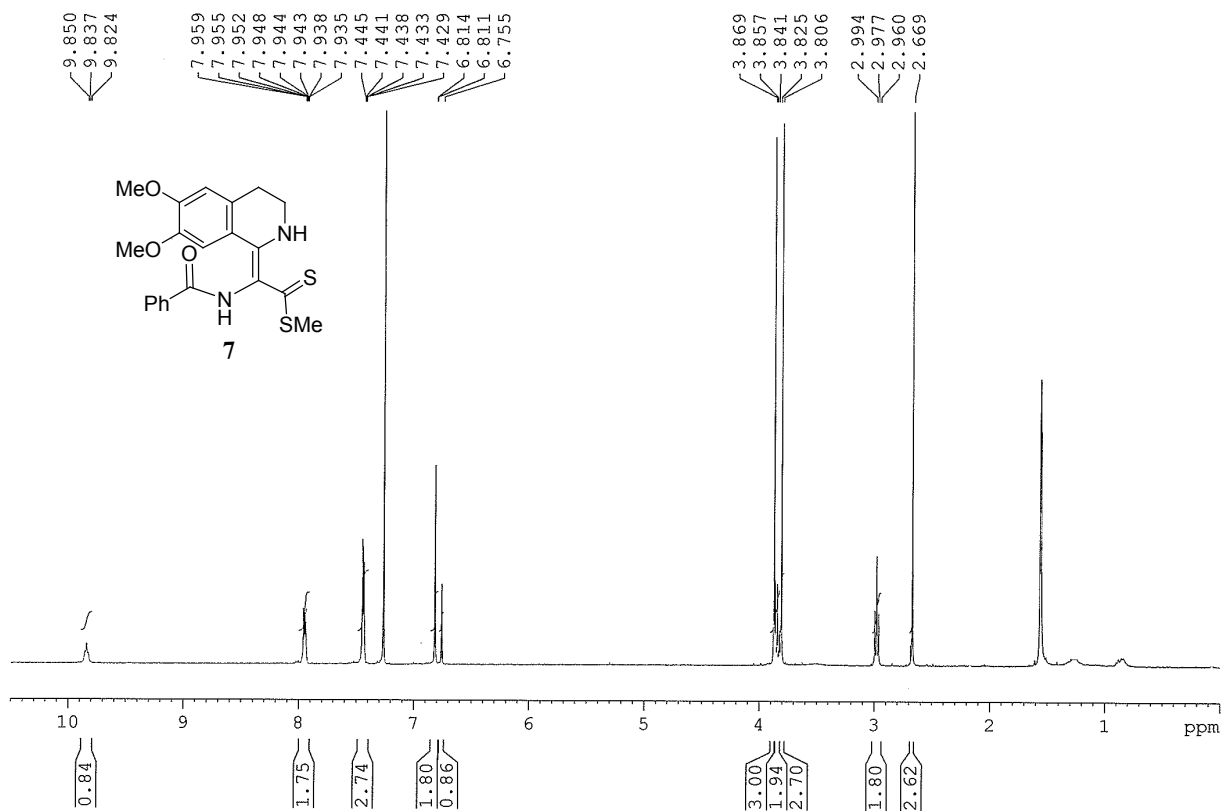

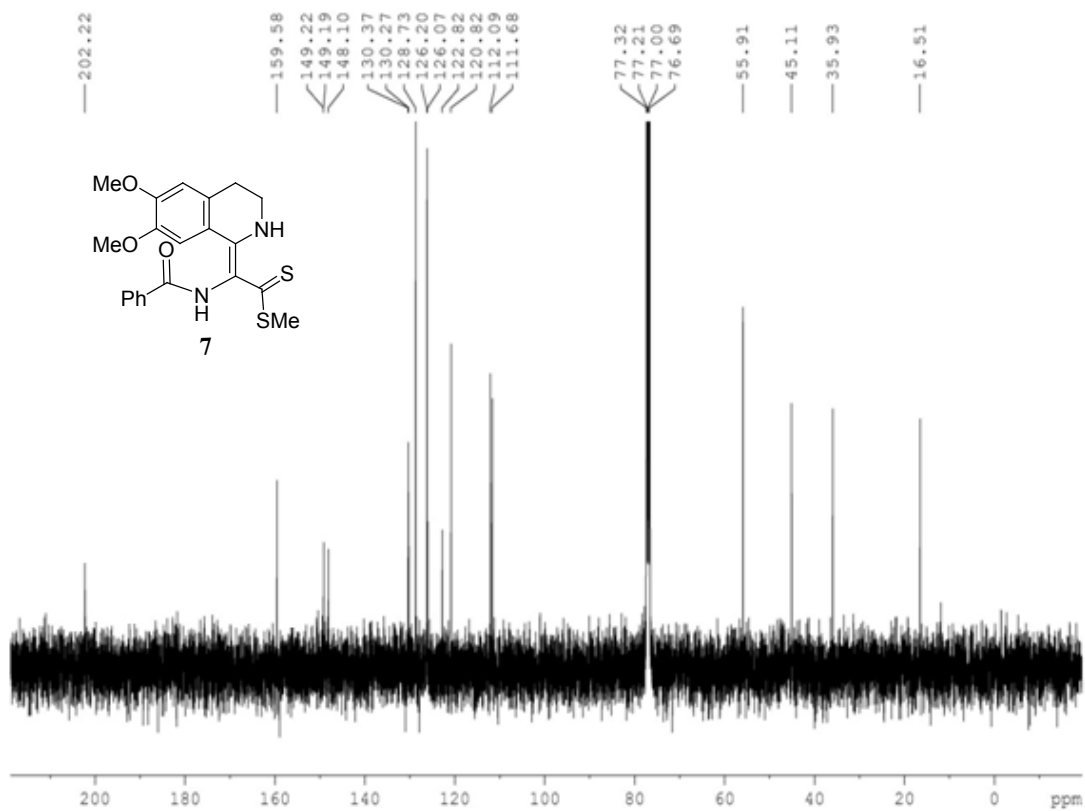

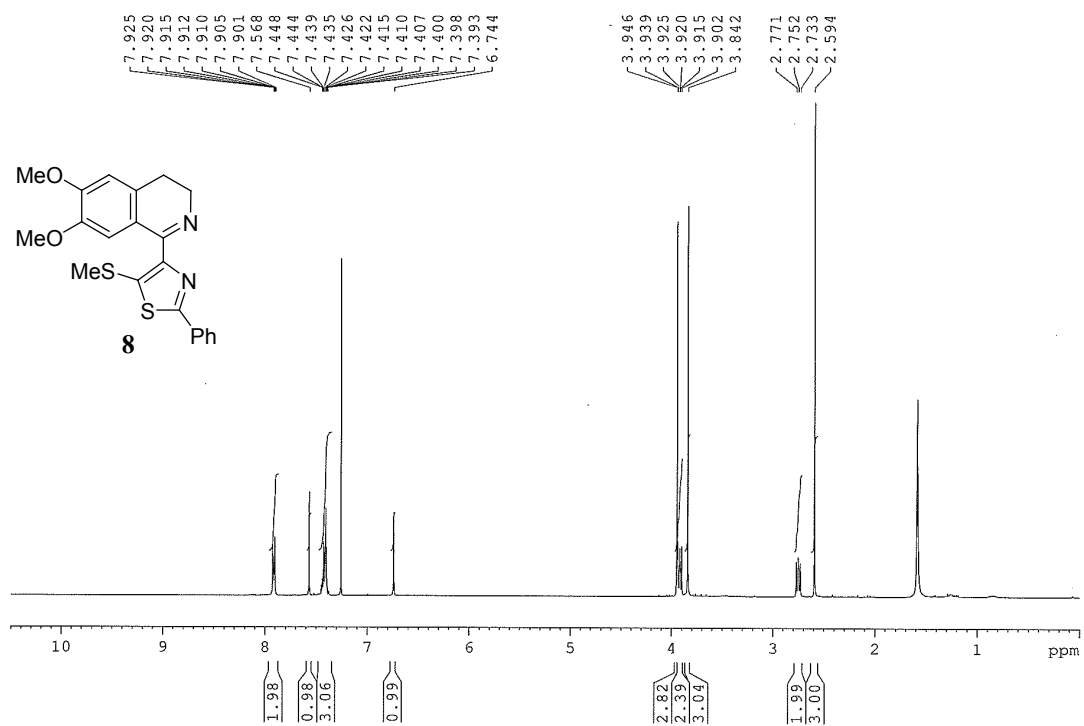



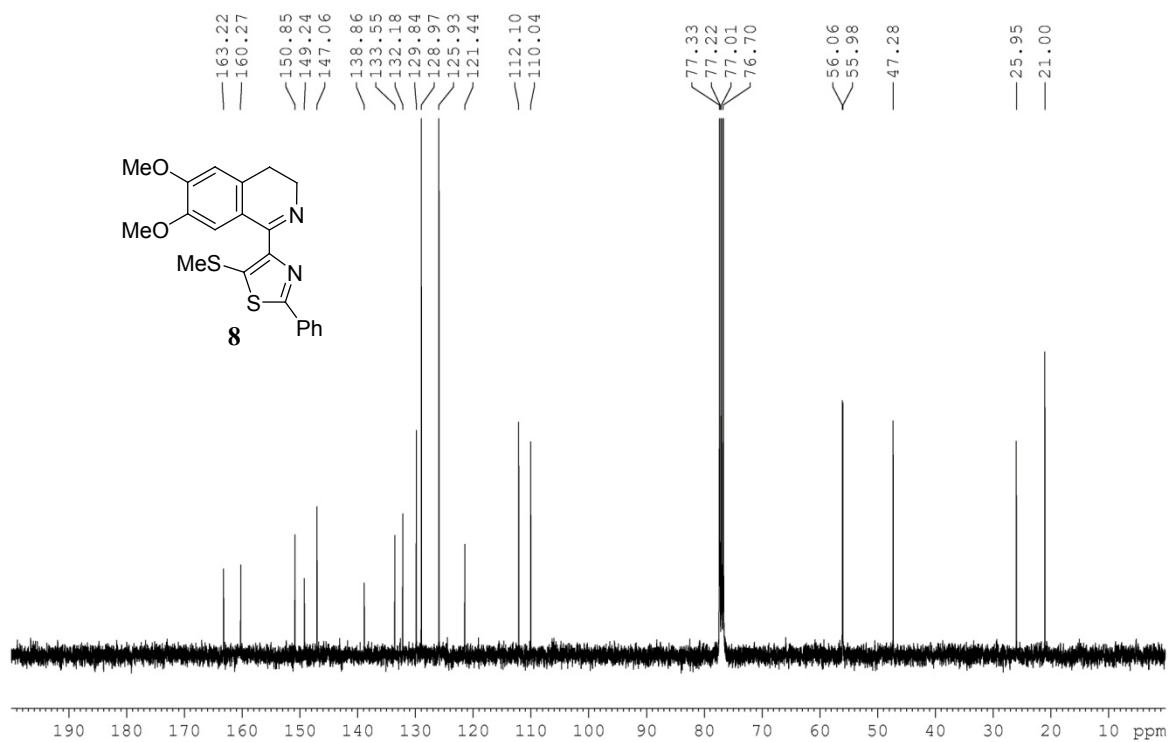

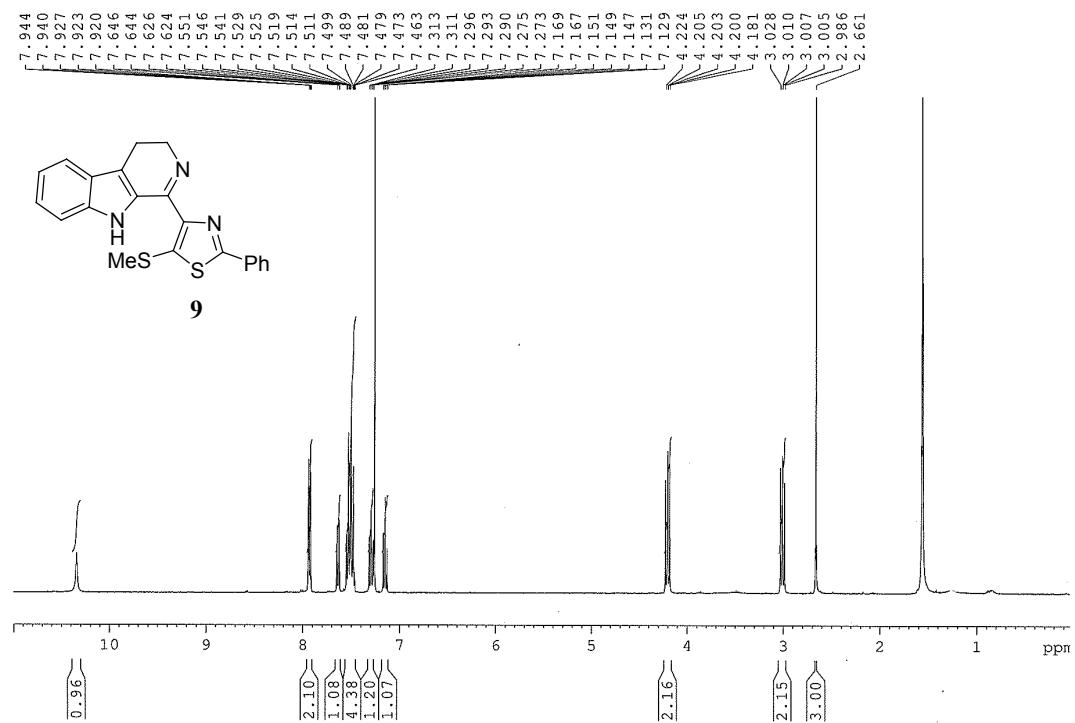

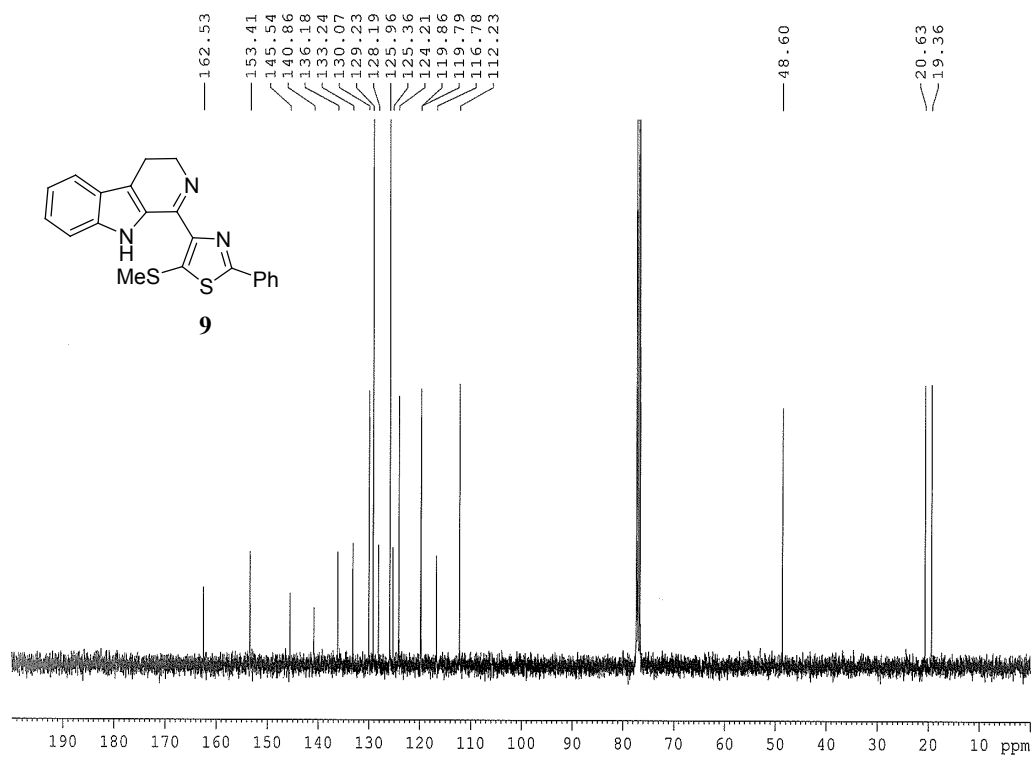

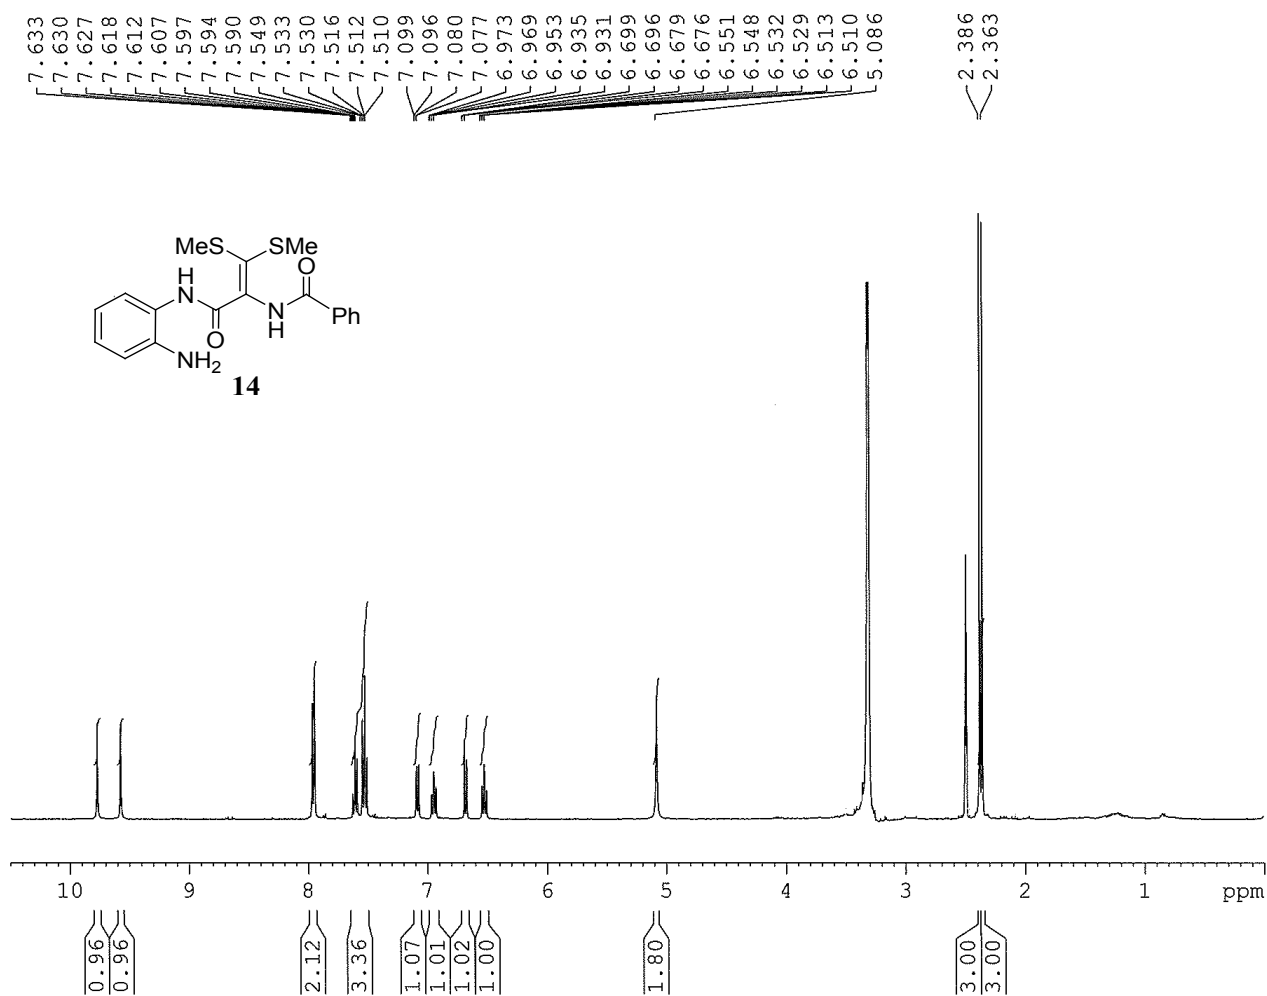

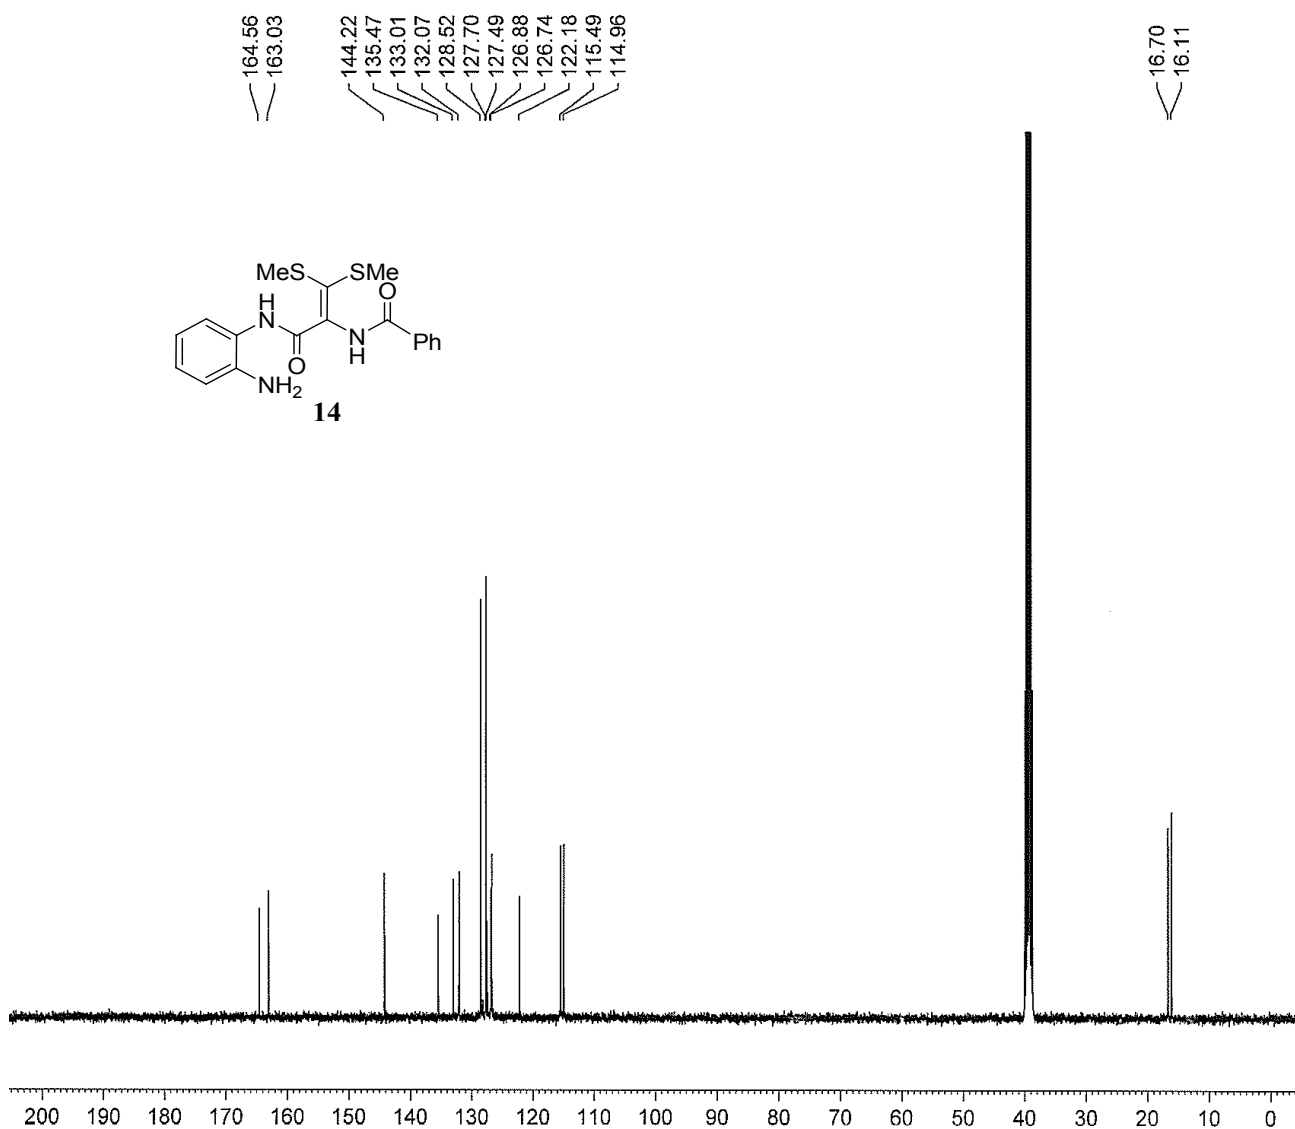

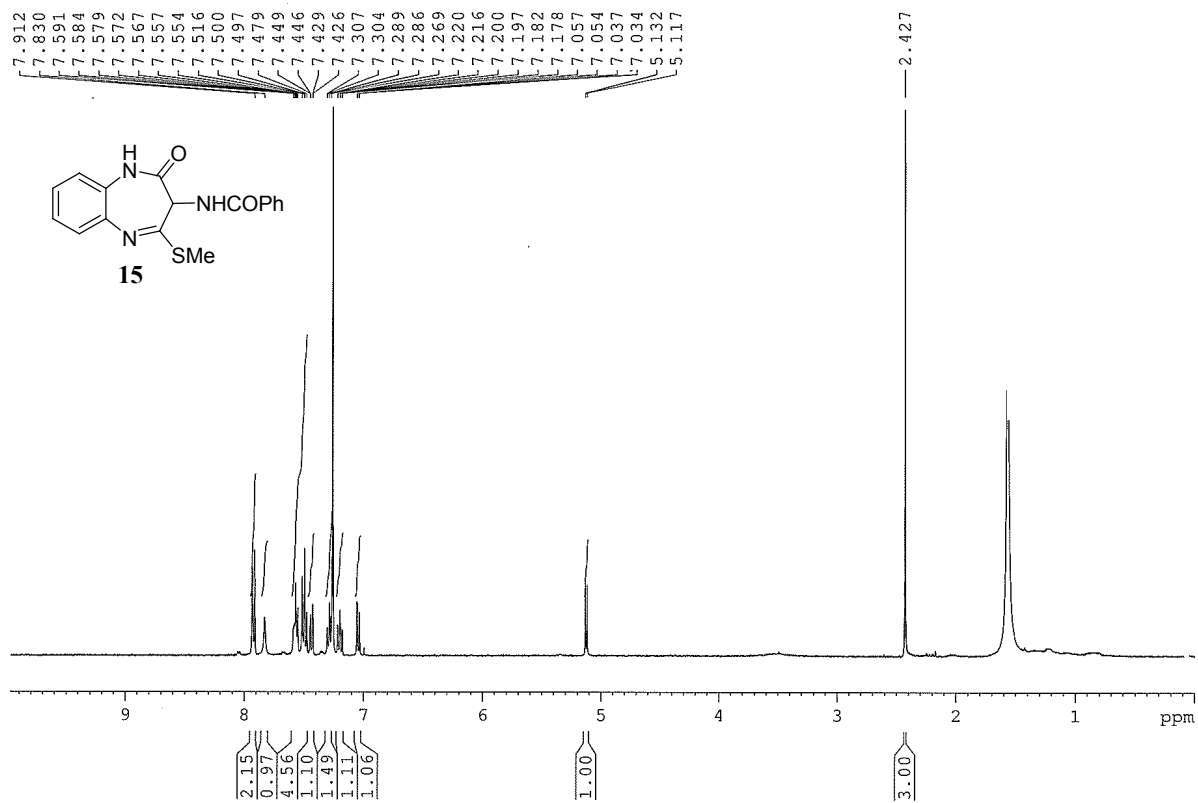

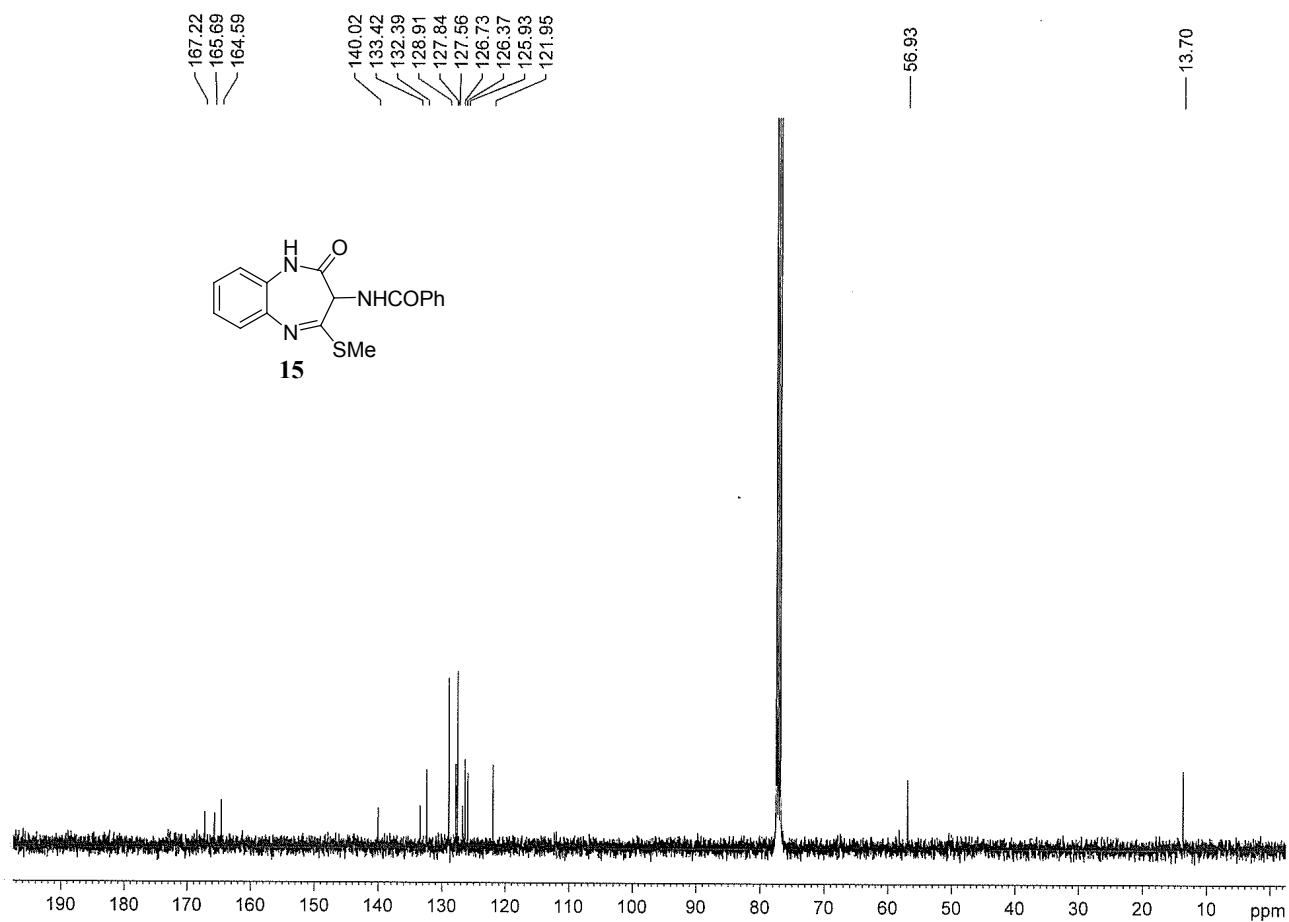

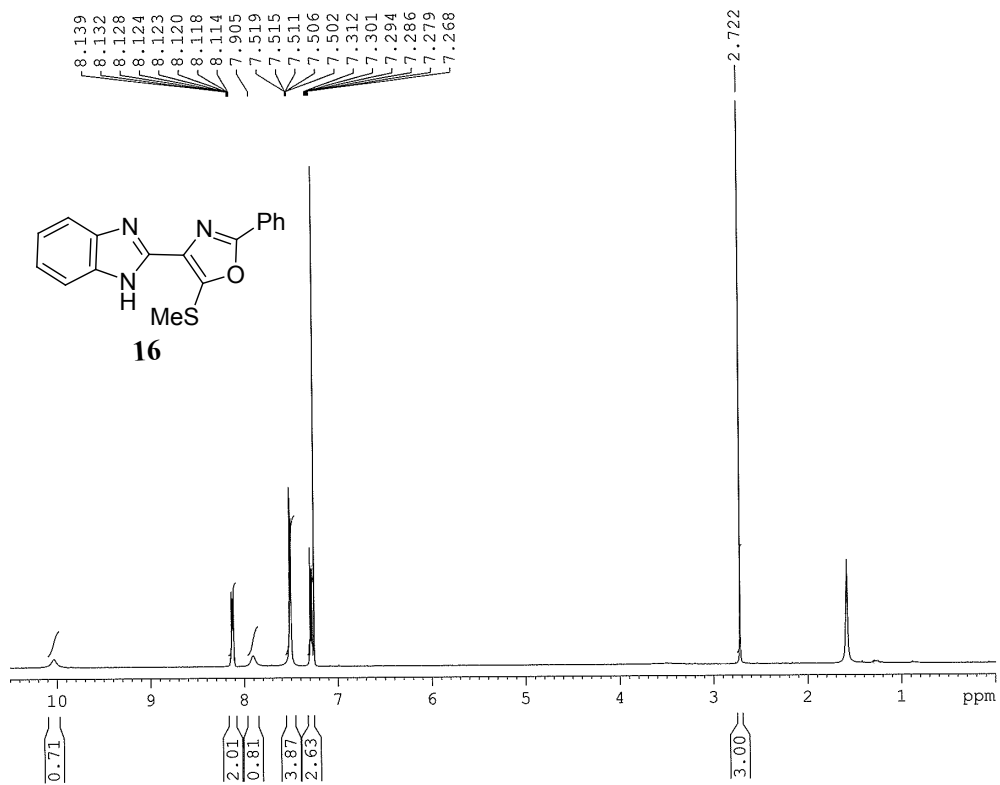



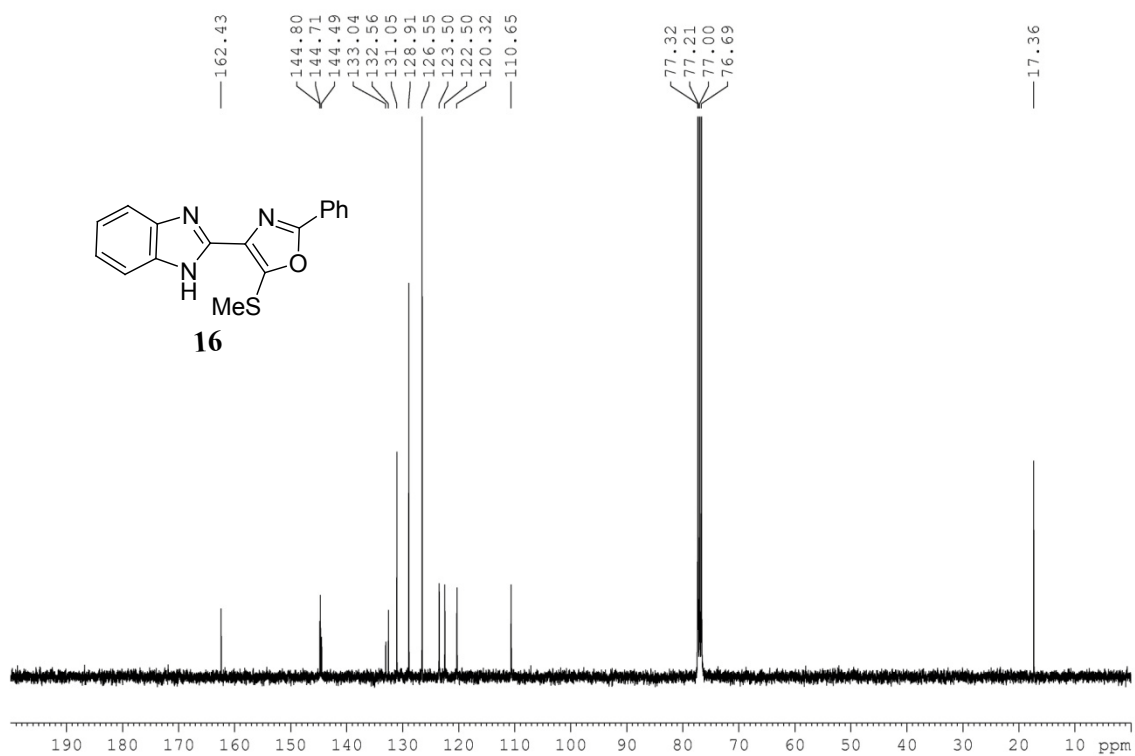

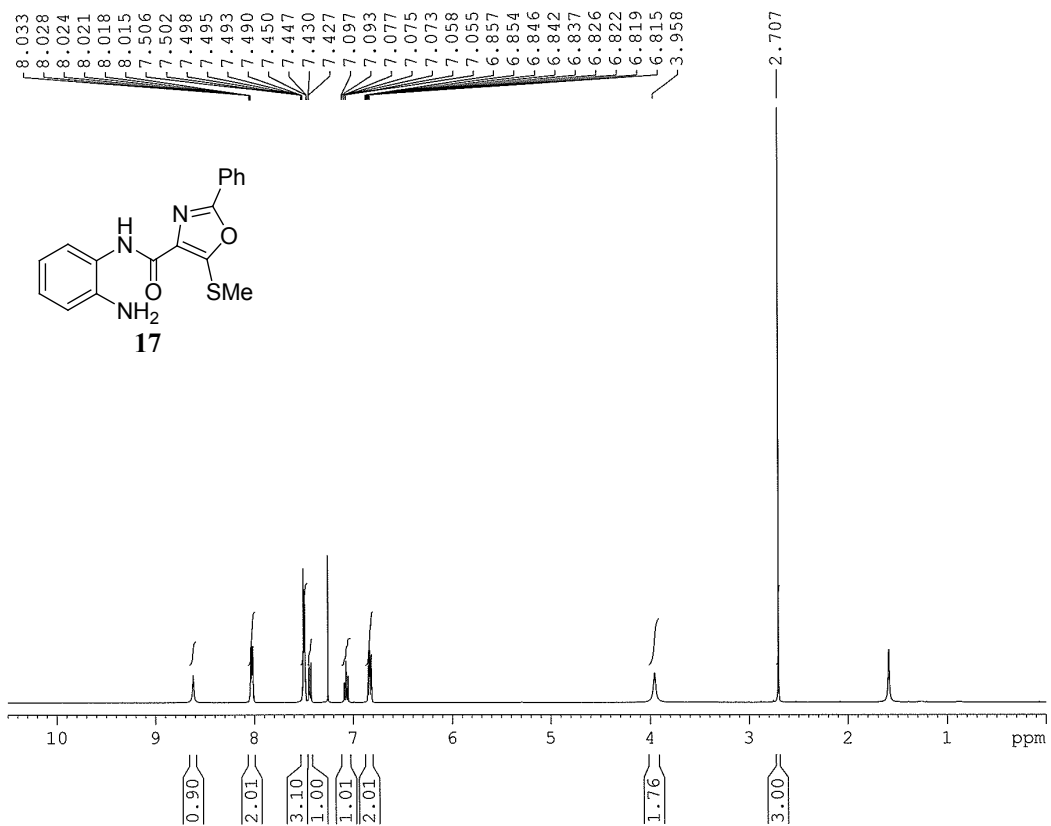

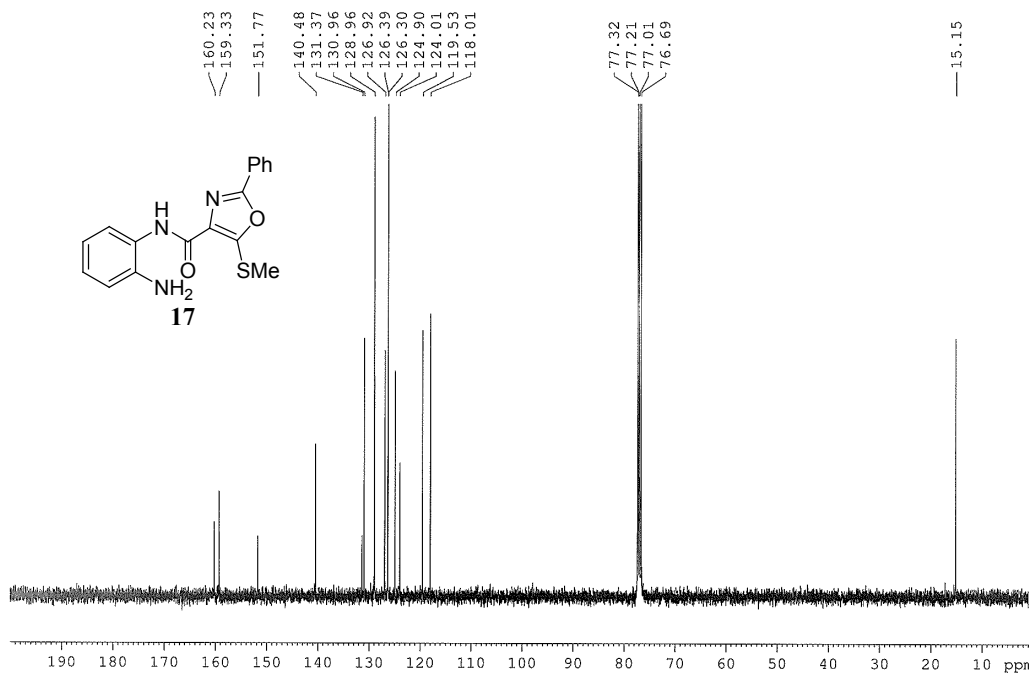

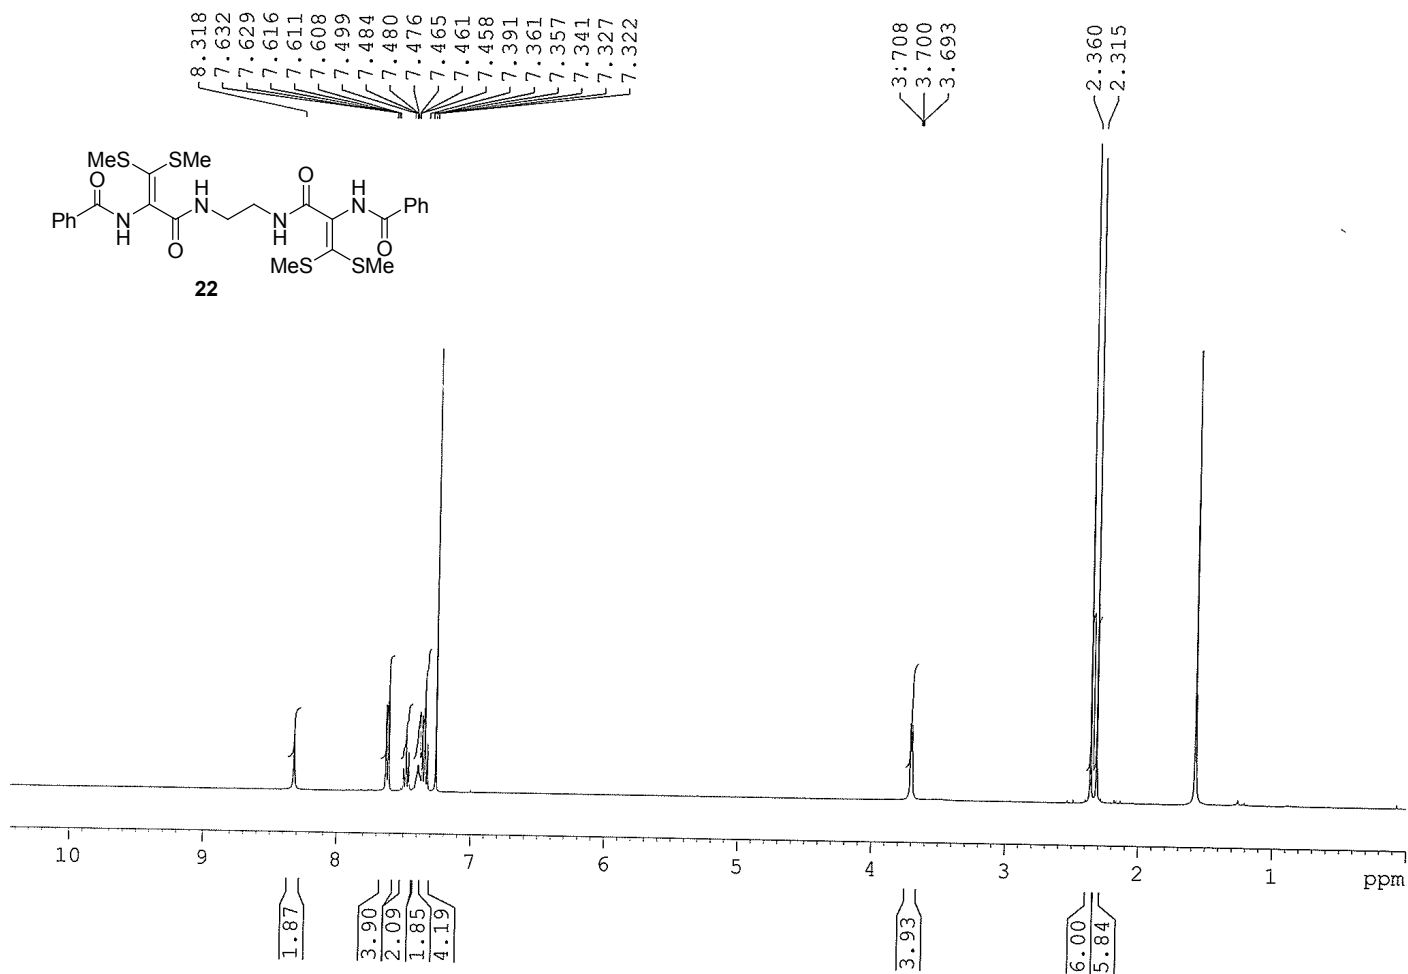

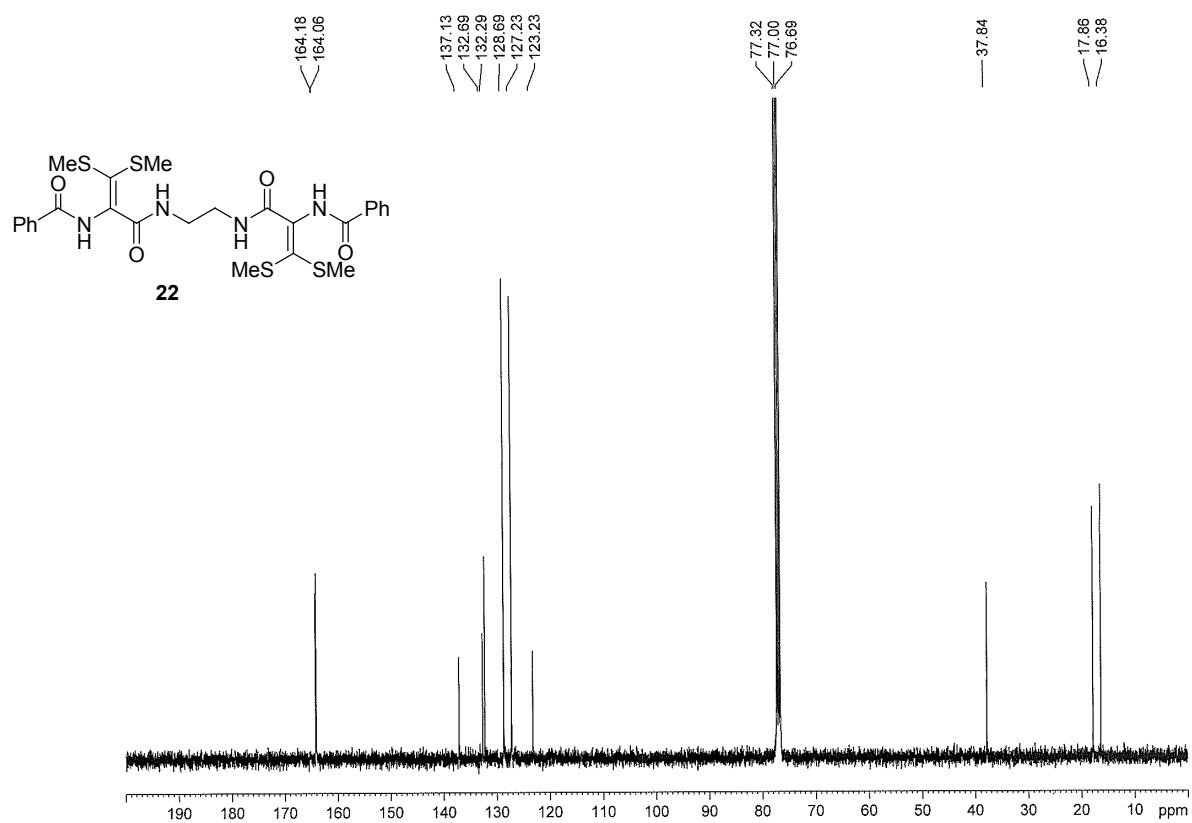

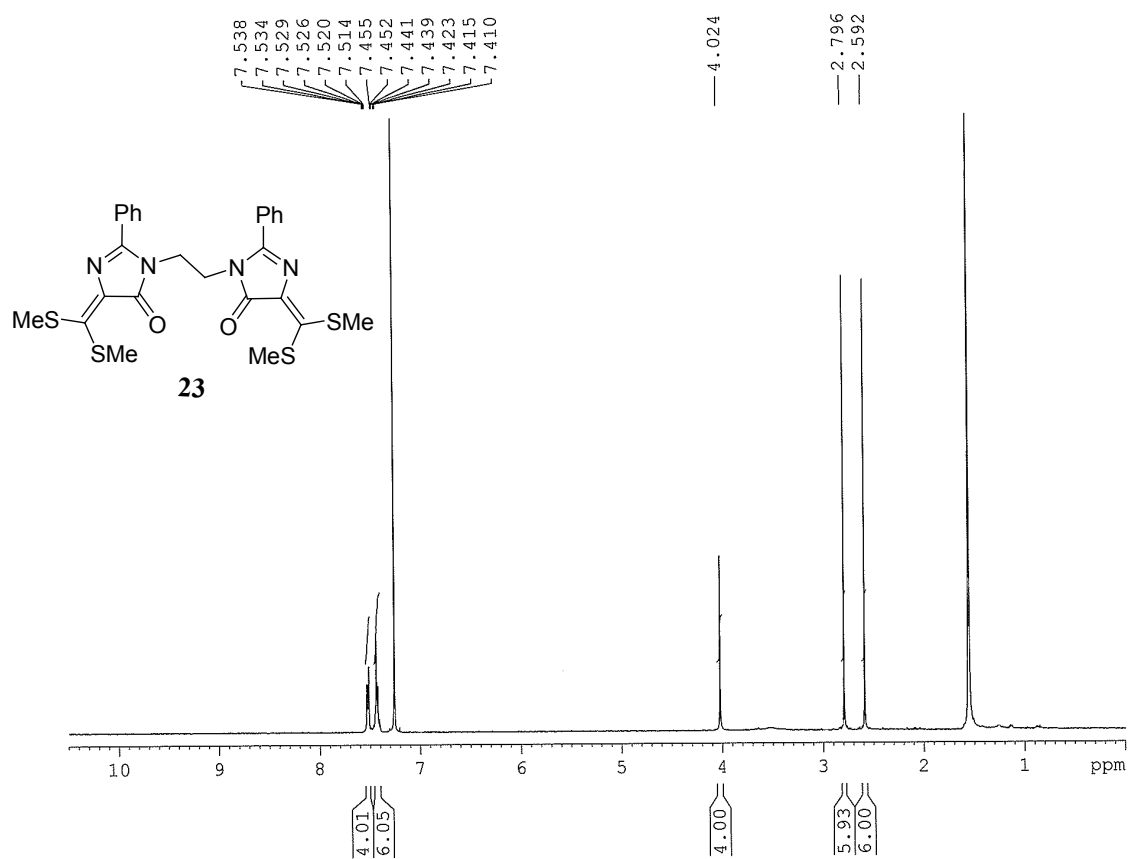

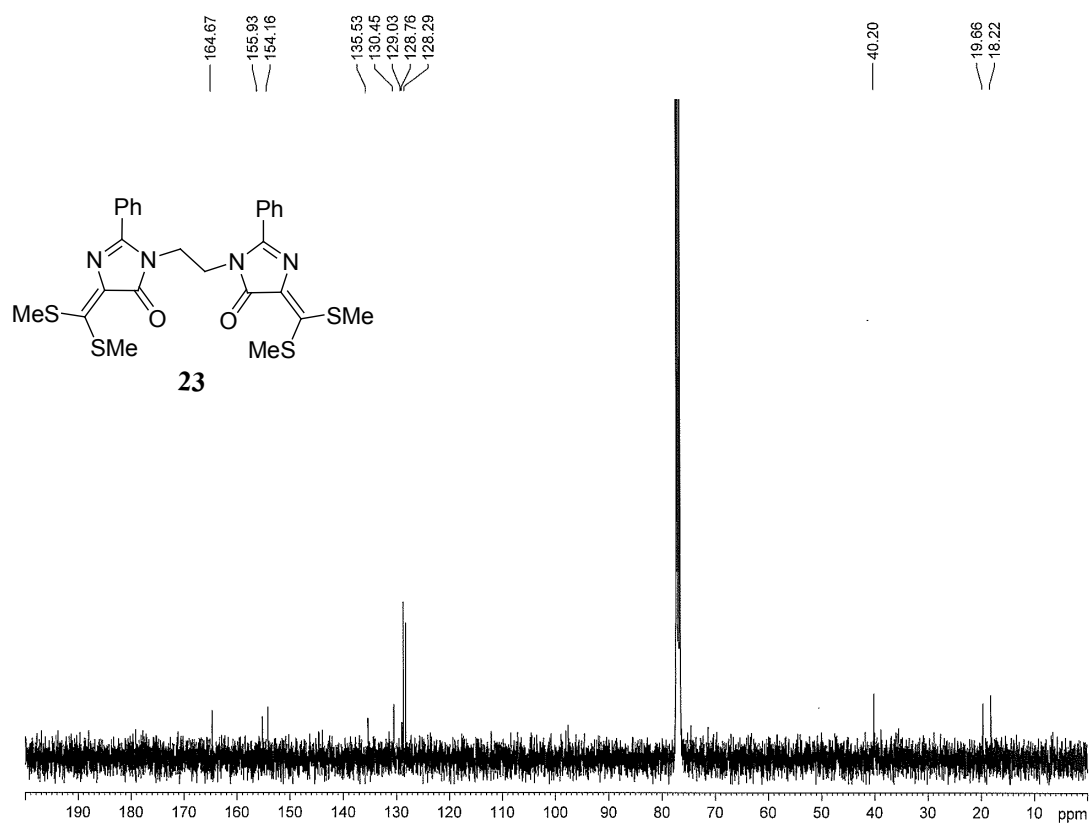

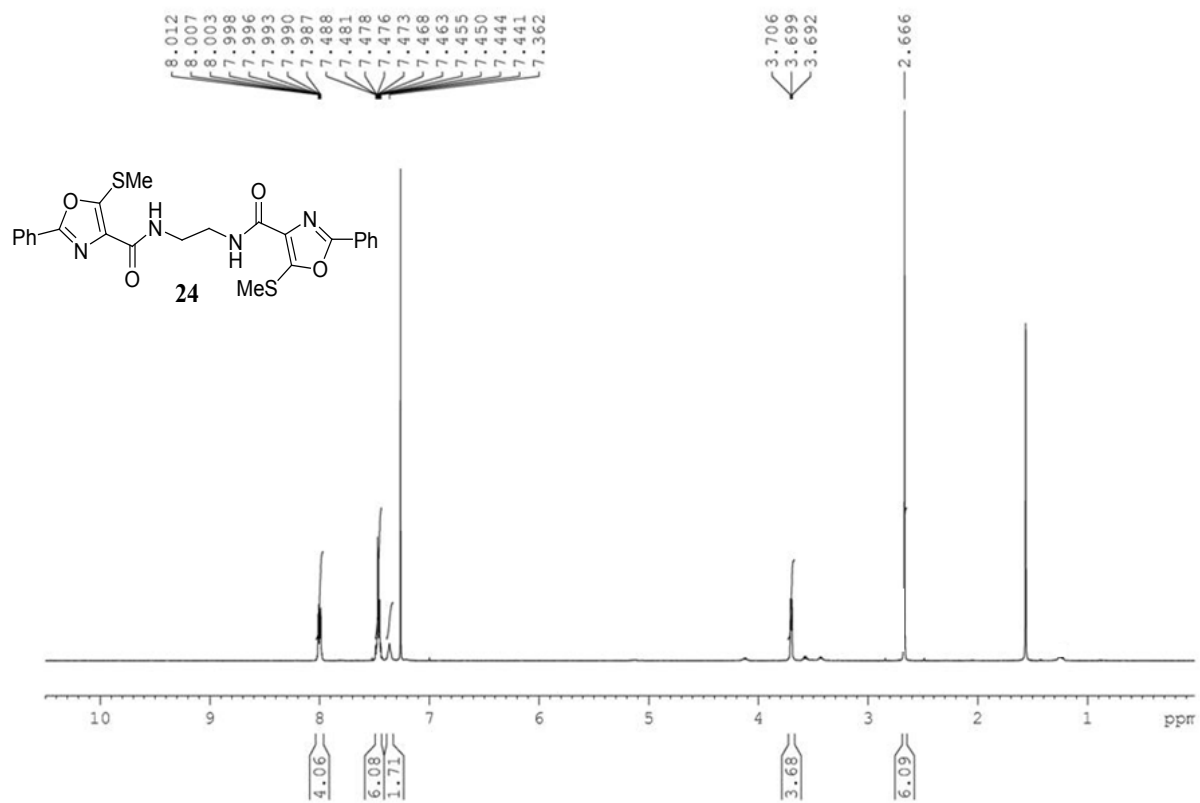



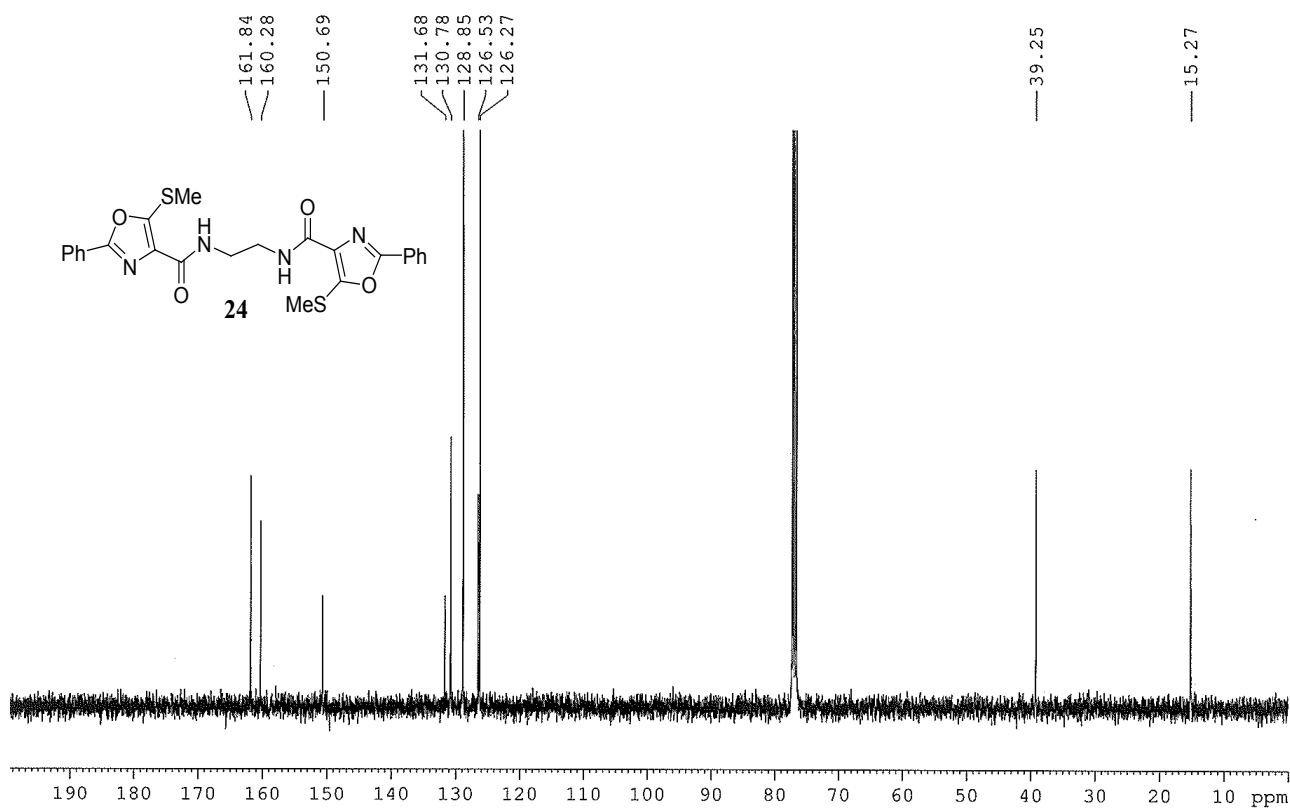

Supplement: c1ob05495c.pdf [file c1ob05495c.pdf]
